# Supplementary material for: Bayesian Disease Mapping to Identify High-Risk Population for Oral Cancer: A Retrospective Spatiotemporal Analysis
Source: Hindawi journal article supplement (doi:10.1155/2023/3243373), 2023-11-02
Supplement: f1 [file 3243373.f1.pdf]

**Table of Contents**

[Overall Incidence \(SIR\) based on Local Government Area](#)

[Incidence \(SIR\) in Males based on Local Government Area](#)

[Incidence \(SIR\) in Females based on Local Government Area](#)

[Incidence \(SIR\) of Oral Cavity Carcinoma \(OCC\) based on Local Government Area](#)

[Incidence \(SIR\) of Oro-pharyngeal carcinoma \(OPC\) based on Local Government Area](#)

[Overall Mortality \(SMR\) based on Local Government Area](#)

[5 Year Mortality \(SMR\) based on Local Government Area](#)

[3 Year Mortality \(SMR\) based on Local Government Area](#)

[Overall Incidence \(SIR\) based on Suburb](#)

**Abbreviations:**

INC - Incidence

OV - Overall

SIR - Standardized Incidence Ratio

SMR - Standardized Mortality Ratio

LGA - Local Government Area

LL - Lower Limit

UL- Upper limit

| LGA                             | SIR    | LL          | Median      | UL          | Population |
|---------------------------------|--------|-------------|-------------|-------------|------------|
| Aurukun Shire                   | RR[55] | 0.77        | 1.45        | 2.58        | 896        |
| Balonne Shire                   | RR[56] | 0.79        | 1.22        | 1.83        | 3433       |
| Banana Shire                    | RR[57] | 0.88        | 1.18        | 1.55        | 11152      |
| Barcaldine Regional             | RR[58] | 0.90        | 1.40        | 2.11        | 2281       |
| Barcoo Shire                    | RR[59] | 0.83        | 1.53        | 2.71        | 225        |
| Blackall Tambo Regional         | RR[60] | 0.94        | 1.52        | 2.39        | 1570       |
| Boulia Shire                    | RR[61] | <b>1.06</b> | <b>1.92</b> | <b>3.42</b> | 352        |
| Brisbane City                   | RR[62] | 0.88        | 0.92        | 0.96        | 931878     |
| Bulloo Shire                    | RR[63] | 0.70        | 1.35        | 2.50        | 297        |
| Bundaberg Regional              | RR[64] | <b>1.12</b> | <b>1.26</b> | <b>1.42</b> | 76491      |
| Burdekin Shire                  | RR[65] | <b>1.27</b> | <b>1.62</b> | <b>2.04</b> | 14040      |
| Burke Shire                     | RR[66] | <b>1.04</b> | <b>1.88</b> | <b>3.32</b> | 276        |
| Cairns Regional                 | RR[67] | <b>1.13</b> | <b>1.25</b> | <b>1.37</b> | 124800     |
| Carpentaria Shire               | RR[68] | <b>1.74</b> | <b>2.63</b> | <b>4.03</b> | 1553       |
| Cassowary Coast Regional        | RR[69] | <b>1.42</b> | <b>1.72</b> | <b>2.05</b> | 23460      |
| Central Highlands Regional      | RR[70] | 0.64        | 0.84        | 1.08        | 21079      |
| Charters Towers Regional        | RR[71] | <b>1.28</b> | <b>1.68</b> | <b>2.18</b> | 9321       |
| Cherbourg Aboriginal Shire      | RR[72] | 0.42        | 0.92        | 1.85        | 805        |
| Cloncurry Shire                 | RR[73] | <b>1.24</b> | <b>1.90</b> | <b>2.80</b> | 2418       |
| Cook Shire                      | RR[74] | <b>1.77</b> | <b>2.54</b> | <b>3.60</b> | 3442       |
| Croydon Shire                   | RR[75] | 0.85        | 1.58        | 2.83        | 237        |
| Diamantina Shire                | RR[76] | 0.92        | 1.74        | 3.27        | 237        |
| Doomadgee Aboriginal Shire      | RR[77] | 0.58        | 1.28        | 2.51        | 861        |
| Douglas Shire                   | RR[78] | <b>1.04</b> | <b>1.40</b> | <b>1.84</b> | 9781       |
| Etheridge Shire                 | RR[1]  | 0.94        | 1.58        | 2.61        | 647        |
| Flinders Shire                  | RR[2]  | 0.87        | 1.46        | 2.33        | 1270       |
| Fraser Coast Regional           | RR[3]  | <b>1.10</b> | <b>1.24</b> | <b>1.39</b> | 84462      |
| Gladstone Regional              | RR[4]  | 0.69        | 0.84        | 1.00        | 47696      |
| Gold Coast City                 | RR[5]  | 0.87        | 0.93        | 0.98        | 454869     |
| Goondiwindi Regional            | RR[6]  | 0.90        | 1.25        | 1.69        | 8360       |
| Gympie Regional                 | RR[7]  | 0.76        | 0.92        | 1.10        | 40504      |
| Hinchinbrook Shire              | RR[8]  | <b>1.57</b> | <b>2.04</b> | <b>2.62</b> | 9178       |
| Hope Vale Aboriginal Shire      | RR[9]  | 0.51        | 1.15        | 2.28        | 658        |
| Ipswich City                    | RR[10] | 0.83        | 0.92        | 1.02        | 147805     |
| Isaac Regional                  | RR[11] | 0.65        | 0.88        | 1.16        | 15636      |
| Kowanyama Aboriginal Shire      | RR[12] | 0.94        | 1.73        | 3.08        | 690        |
| Livingstone Shire               | RR[13] | <b>1.08</b> | <b>1.31</b> | <b>1.57</b> | 29422      |
| Lockhart River Aboriginal Shire | RR[14] | 0.54        | 1.23        | 2.52        | 488        |
| Lockyer Valley Regional         | RR[15] | 0.69        | 0.86        | 1.06        | 31066      |
| Logan City                      | RR[16] | 0.70        | 0.77        | 0.84        | 234853     |
| Longreach Regional              | RR[17] | <b>1.35</b> | <b>2.00</b> | <b>2.92</b> | 2961       |
| Mackay Regional                 | RR[18] | <b>1.04</b> | <b>1.17</b> | <b>1.31</b> | 91200      |
| Mapoon Aboriginal Shire         | RR[19] | 0.67        | 1.39        | 2.75        | 225        |
| Maranoa Regional                | RR[20] | <b>1.02</b> | <b>1.36</b> | <b>1.80</b> | 9908       |
| Mareeba Shire                   | RR[21] | <b>1.14</b> | <b>1.44</b> | <b>1.78</b> | 17681      |
| McKinlay Shire                  | RR[22] | <b>1.25</b> | <b>2.11</b> | <b>3.55</b> | 659        |
| Moreton Bay Regional            | RR[23] | 0.80        | 0.86        | 0.92        | 336169     |
| Mornington Shire                | RR[24] | 0.80        | 1.65        | 3.15        | 797        |
| Mount Isa City                  | RR[25] | <b>2.14</b> | <b>2.61</b> | <b>3.15</b> | 14196      |

|                                  |        |             |             |             |        |
|----------------------------------|--------|-------------|-------------|-------------|--------|
| Murweh Shire                     | RR[26] | <b>1.09</b> | <b>1.62</b> | <b>2.36</b> | 3404   |
| Napranum Aboriginal Shire        | RR[27] | 0.69        | 1.34        | 2.40        | 665    |
| Noosa Shire                      | RR[28] | 0.95        | 1.12        | 1.32        | 43701  |
| North Burnett Regional           | RR[29] | 0.84        | 1.16        | 1.57        | 8621   |
| Northern Peninsula Area Regional | RR[30] | 0.54        | 1.03        | 1.76        | 1769   |
| Palm Island Aboriginal Shire     | RR[31] | 0.37        | 0.82        | 1.55        | 1665   |
| Paroo Shire                      | RR[32] | 0.78        | 1.31        | 2.12        | 1329   |
| Pormpuraaw Aboriginal Shire      | RR[33] | <b>1.08</b> | <b>1.99</b> | <b>3.65</b> | 548    |
| Quilpie Shire                    | RR[34] | <b>1.03</b> | <b>1.72</b> | <b>2.93</b> | 644    |
| Redland City                     | RR[35] | 0.90        | 1.00        | 1.12        | 119406 |
| Richmond Shire                   | RR[36] | 0.77        | 1.40        | 2.36        | 644    |
| Rockhampton Regional             | RR[37] | <b>1.07</b> | <b>1.22</b> | <b>1.39</b> | 63150  |
| Scenic Rim Regional              | RR[38] | 0.79        | 0.97        | 1.18        | 32485  |
| Somerset Regional                | RR[39] | 0.98        | 1.23        | 1.54        | 19566  |
| South Burnett Regional           | RR[40] | 1.00        | 1.22        | 1.49        | 26057  |
| Southern Downs Regional          | RR[41] | 0.89        | 1.10        | 1.34        | 28497  |
| Sunshine Coast Regional          | RR[42] | 0.82        | 0.89        | 0.96        | 240988 |
| Tablelands Regional              | RR[43] | <b>1.17</b> | <b>1.44</b> | <b>1.76</b> | 20322  |
| Toowoomba Regional               | RR[44] | 0.83        | 0.93        | 1.03        | 128187 |
| Torres Shire                     | RR[45] | <b>1.06</b> | <b>1.66</b> | <b>2.53</b> | 2632   |
| Torres Strait Island Regional    | RR[46] | 0.92        | 1.53        | 2.41        | 2952   |
| Townsville City                  | RR[47] | 0.96        | 1.06        | 1.16        | 149049 |
| Weipa Town                       | RR[48] | 0.55        | 1.02        | 1.70        | 2868   |
| Western Downs Regional           | RR[49] | 0.89        | 1.11        | 1.35        | 26063  |
| Whitsunday Regional              | RR[50] | <b>1.01</b> | <b>1.24</b> | <b>1.50</b> | 27657  |
| Winton Shire                     | RR[51] | <b>1.49</b> | <b>2.34</b> | <b>3.82</b> | 950    |
| Woorabinda Aboriginal Shire      | RR[52] | 0.61        | 1.16        | 2.15        | 638    |
| Wujal Wujal Aboriginal Shire     | RR[53] | <b>1.13</b> | <b>2.16</b> | <b>4.34</b> | 220    |
| Yarrabah Aboriginal Shire        | RR[54] | <b>1.78</b> | <b>2.91</b> | <b>4.58</b> | 1692   |

| LGA                             | SIR    | LL          | Median      | UL          | Population |
|---------------------------------|--------|-------------|-------------|-------------|------------|
| Aurukun Shire                   | RR[55] | 0.89        | 1.69        | 3.04        | 444        |
| Balonne Shire                   | RR[56] | 0.79        | 1.24        | 1.88        | 1753       |
| Banana Shire                    | RR[57] | 0.90        | 1.23        | 1.65        | 5770       |
| Barcaldine Regional             | RR[58] | 0.98        | 1.52        | 2.28        | 1147       |
| Barcoo Shire                    | RR[59] | 0.94        | 1.68        | 2.93        | 132        |
| Blackall Tambo Regional         | RR[60] | <b>1.06</b> | <b>1.69</b> | <b>2.68</b> | 776        |
| Boulia Shire                    | RR[61] | <b>1.16</b> | <b>2.04</b> | <b>3.58</b> | 192        |
| Brisbane City                   | RR[62] | 0.84        | 0.89        | 0.93        | 454152     |
| Bulloo Shire                    | RR[63] | 0.80        | 1.51        | 2.77        | 164        |
| Bundaberg Regional              | RR[64] | <b>1.06</b> | <b>1.23</b> | <b>1.42</b> | 37236      |
| Burdekin Shire                  | RR[65] | <b>1.34</b> | <b>1.74</b> | <b>2.24</b> | 7078       |
| Burke Shire                     | RR[66] | <b>1.13</b> | <b>1.99</b> | <b>3.46</b> | 153        |
| Cairns Regional                 | RR[67] | <b>1.24</b> | <b>1.39</b> | <b>1.54</b> | 60894      |
| Carpentaria Shire               | RR[68] | <b>1.81</b> | <b>2.72</b> | <b>4.28</b> | 800        |
| Cassowary Coast Regional        | RR[69] | <b>1.29</b> | <b>1.60</b> | <b>1.97</b> | 11997      |
| Central Highlands Regional      | RR[70] | 0.76        | 1.00        | 1.28        | 11191      |
| Charters Towers Regional        | RR[71] | <b>1.43</b> | <b>1.90</b> | <b>2.51</b> | 4563       |
| Cherbourg Aboriginal Shire      | RR[72] | 0.44        | 0.99        | 2.06        | 378        |
| Cloncurry Shire                 | RR[73] | <b>1.33</b> | <b>2.03</b> | <b>3.00</b> | 1398       |
| Cook Shire                      | RR[74] | <b>1.67</b> | <b>2.38</b> | <b>3.45</b> | 1903       |
| Croydon Shire                   | RR[75] | 0.98        | 1.76        | 3.12        | 122        |
| Diamantina Shire                | RR[76] | 0.93        | 1.75        | 3.23        | 120        |
| Doomadgee Aboriginal Shire      | RR[77] | 0.57        | 1.34        | 2.74        | 393        |
| Douglas Shire                   | RR[78] | <b>1.21</b> | <b>1.65</b> | <b>2.20</b> | 4913       |
| Etheridge Shire                 | RR[1]  | <b>1.06</b> | <b>1.74</b> | <b>2.82</b> | 362        |
| Flinders Shire                  | RR[2]  | <b>1.03</b> | <b>1.67</b> | <b>2.67</b> | 648        |
| Fraser Coast Regional           | RR[3]  | <b>1.11</b> | <b>1.27</b> | <b>1.45</b> | 41026      |
| Gladstone Regional              | RR[4]  | 0.73        | 0.90        | 1.09        | 24578      |
| Gold Coast City                 | RR[5]  | 0.89        | 0.95        | 1.02        | 218486     |
| Goondiwindi Regional            | RR[6]  | 1.00        | 1.40        | 1.95        | 4159       |
| Gympie Regional                 | RR[7]  | 0.75        | 0.93        | 1.14        | 19888      |
| Hinchinbrook Shire              | RR[8]  | <b>1.54</b> | <b>2.06</b> | <b>2.72</b> | 4670       |
| Hope Vale Aboriginal Shire      | RR[9]  | 0.58        | 1.33        | 2.67        | 345        |
| Ipswich City                    | RR[10] | 0.79        | 0.89        | 1.00        | 72236      |
| Isaac Regional                  | RR[11] | 0.79        | 1.06        | 1.38        | 8704       |
| Kowanyama Aboriginal Shire      | RR[12] | <b>1.11</b> | <b>2.04</b> | <b>3.74</b> | 321        |
| Livingstone Shire               | RR[13] | <b>1.02</b> | <b>1.27</b> | <b>1.56</b> | 14982      |
| Lockhart River Aboriginal Shire | RR[14] | 0.63        | 1.44        | 2.97        | 238        |
| Lockyer Valley Regional         | RR[15] | 0.69        | 0.89        | 1.12        | 15349      |
| Logan City                      | RR[16] | 0.66        | 0.74        | 0.82        | 114884     |
| Longreach Regional              | RR[17] | <b>1.46</b> | <b>2.19</b> | <b>3.28</b> | 1434       |
| Mackay Regional                 | RR[18] | <b>1.08</b> | <b>1.23</b> | <b>1.40</b> | 46084      |
| Mapoon Aboriginal Shire         | RR[19] | 0.75        | 1.56        | 3.05        | 113        |
| Maranoa Regional                | RR[20] | <b>1.04</b> | <b>1.42</b> | <b>1.91</b> | 5037       |
| Mareeba Shire                   | RR[21] | <b>1.26</b> | <b>1.60</b> | <b>2.01</b> | 9327       |
| McKinlay Shire                  | RR[22] | <b>1.31</b> | <b>2.17</b> | <b>3.63</b> | 362        |
| Moreton Bay Regional            | RR[23] | 0.75        | 0.81        | 0.89        | 162423     |
| Mornington Shire                | RR[24] | 0.80        | 1.73        | 3.48        | 376        |
| Mount Isa City                  | RR[25] | <b>1.89</b> | <b>2.39</b> | <b>2.97</b> | 7372       |

|                                  |        |             |             |             |        |
|----------------------------------|--------|-------------|-------------|-------------|--------|
| Murweh Shire                     | RR[26] | <b>1.26</b> | <b>1.88</b> | <b>2.81</b> | 1663   |
| Napranum Aboriginal Shire        | RR[27] | 0.74        | 1.44        | 2.59        | 342    |
| Noosa Shire                      | RR[28] | 0.94        | 1.15        | 1.39        | 20977  |
| North Burnett Regional           | RR[29] | 0.74        | 1.06        | 1.46        | 4402   |
| Northern Peninsula Area Regional | RR[30] | 0.62        | 1.21        | 2.09        | 835    |
| Palm Island Aboriginal Shire     | RR[31] | 0.43        | 0.97        | 1.85        | 820    |
| Paroo Shire                      | RR[32] | 0.86        | 1.43        | 2.31        | 665    |
| Pormpuraaw Aboriginal Shire      | RR[33] | <b>1.14</b> | <b>2.11</b> | <b>3.93</b> | 273    |
| Quilpie Shire                    | RR[34] | <b>1.17</b> | <b>1.92</b> | <b>3.25</b> | 336    |
| Redland City                     | RR[35] | 0.89        | 1.01        | 1.15        | 57690  |
| Richmond Shire                   | RR[36] | 0.90        | 1.59        | 2.64        | 336    |
| Rockhampton Regional             | RR[37] | <b>1.13</b> | <b>1.32</b> | <b>1.53</b> | 30920  |
| Scenic Rim Regional              | RR[38] | 0.72        | 0.92        | 1.15        | 15912  |
| Somerset Regional                | RR[39] | 0.90        | 1.17        | 1.50        | 9828   |
| South Burnett Regional           | RR[40] | 0.91        | 1.15        | 1.44        | 12940  |
| Southern Downs Regional          | RR[41] | 0.88        | 1.12        | 1.40        | 13870  |
| Sunshine Coast Regional          | RR[42] | 0.77        | 0.85        | 0.94        | 114598 |
| Tablelands Regional              | RR[43] | <b>1.14</b> | <b>1.45</b> | <b>1.82</b> | 9880   |
| Toowoomba Regional               | RR[44] | 0.77        | 0.88        | 1.00        | 61753  |
| Torres Shire                     | RR[45] | <b>1.29</b> | <b>2.04</b> | <b>3.17</b> | 1279   |
| Torres Strait Island Regional    | RR[46] | 0.94        | 1.64        | 2.67        | 1506   |
| Townsville City                  | RR[47] | 0.95        | 1.06        | 1.19        | 74011  |
| Weipa Town                       | RR[48] | 0.60        | 1.13        | 1.92        | 1549   |
| Western Downs Regional           | RR[49] | 0.77        | 1.00        | 1.25        | 13292  |
| Whitsunday Regional              | RR[50] | <b>1.08</b> | <b>1.34</b> | <b>1.65</b> | 14285  |
| Winton Shire                     | RR[51] | <b>1.42</b> | <b>2.22</b> | <b>3.58</b> | 494    |
| Woorabinda Aboriginal Shire      | RR[52] | 0.69        | 1.30        | 2.41        | 311    |
| Wujal Wujal Aboriginal Shire     | RR[53] | <b>1.28</b> | <b>2.43</b> | <b>5.03</b> | 98     |
| Yarrabah Aboriginal Shire        | RR[54] | <b>1.55</b> | <b>2.69</b> | <b>4.53</b> | 837    |

| LGA                             | SIR    | LL          | Median      | UL          | Population |
|---------------------------------|--------|-------------|-------------|-------------|------------|
| Aurukun Shire                   | RR[55] | 0.45        | 1.00        | 2.06        | 456        |
| Balonne Shire                   | RR[56] | 0.59        | 1.03        | 1.75        | 1690       |
| Banana Shire                    | RR[57] | 0.59        | 0.94        | 1.42        | 5379       |
| Barcaldine Regional             | RR[58] | 0.58        | 1.00        | 1.68        | 1141       |
| Barcoo Shire                    | RR[59] | 0.56        | 1.07        | 1.97        | 106        |
| Blackall Tambo Regional         | RR[60] | 0.52        | 0.95        | 1.66        | 790        |
| Boulia Shire                    | RR[61] | 0.66        | 1.31        | 2.48        | 159        |
| Brisbane City                   | RR[62] | 0.93        | 1.01        | 1.08        | 477737     |
| Bulloo Shire                    | RR[63] | 0.49        | 1.00        | 1.95        | 134        |
| Bundaberg Regional              | RR[64] | <b>1.04</b> | <b>1.29</b> | <b>1.59</b> | 39257      |
| Burdekin Shire                  | RR[65] | 0.69        | 1.08        | 1.63        | 6962       |
| Burke Shire                     | RR[66] | 0.67        | 1.35        | 2.58        | 120        |
| Cairns Regional                 | RR[67] | 0.76        | 0.93        | 1.13        | 63903      |
| Carpentaria Shire               | RR[68] | 0.70        | 1.21        | 2.08        | 746        |
| Cassowary Coast Regional        | RR[69] | <b>1.21</b> | <b>1.69</b> | <b>2.32</b> | 11469      |
| Central Highlands Regional      | RR[70] | 0.37        | 0.65        | 0.98        | 9882       |
| Charters Towers Regional        | RR[71] | 0.62        | 0.98        | 1.47        | 4763       |
| Cherbourg Aboriginal Shire      | RR[72] | 0.41        | 0.99        | 2.21        | 429        |
| Cloncurry Shire                 | RR[73] | 0.67        | 1.25        | 2.12        | 1017       |
| Cook Shire                      | RR[74] | 0.77        | 1.28        | 2.34        | 1537       |
| Croydon Shire                   | RR[75] | 0.58        | 1.12        | 2.08        | 109        |
| Diamantina Shire                | RR[76] | 0.65        | 1.27        | 2.55        | 119        |
| Doomadgee Aboriginal Shire      | RR[77] | 0.56        | 1.36        | 3.21        | 461        |
| Douglas Shire                   | RR[78] | 0.51        | 0.88        | 1.39        | 4873       |
| Etheridge Shire                 | RR[1]  | 0.58        | 1.05        | 1.82        | 291        |
| Flinders Shire                  | RR[2]  | 0.54        | 1.00        | 1.72        | 627        |
| Fraser Coast Regional           | RR[3]  | 0.93        | 1.15        | 1.42        | 43437      |
| Gladstone Regional              | RR[4]  | 0.51        | 0.74        | 1.01        | 23115      |
| Gold Coast City                 | RR[5]  | 0.79        | 0.88        | 0.99        | 236380     |
| Goondiwindi Regional            | RR[6]  | 0.49        | 0.86        | 1.37        | 4201       |
| Gympie Regional                 | RR[7]  | 0.67        | 0.94        | 1.25        | 20627      |
| Hinchinbrook Shire              | RR[8]  | 0.89        | 1.37        | 2.13        | 4517       |
| Hope Vale Aboriginal Shire      | RR[9]  | 0.39        | 1.00        | 2.28        | 313        |
| Ipswich City                    | RR[10] | 0.83        | 0.99        | 1.18        | 75575      |
| Isaac Regional                  | RR[11] | 0.33        | 0.63        | 0.99        | 6939       |
| Kowanyama Aboriginal Shire      | RR[12] | 0.50        | 1.05        | 2.09        | 369        |
| Livingstone Shire               | RR[13] | 0.84        | 1.17        | 1.64        | 14439      |
| Lockhart River Aboriginal Shire | RR[14] | 0.40        | 1.01        | 2.33        | 251        |
| Lockyer Valley Regional         | RR[15] | 0.58        | 0.85        | 1.18        | 15707      |
| Logan City                      | RR[16] | 0.74        | 0.86        | 1.00        | 119960     |
| Longreach Regional              | RR[17] | 0.61        | 1.07        | 1.84        | 1535       |
| Mackay Regional                 | RR[18] | 0.74        | 0.94        | 1.18        | 45111      |
| Mapoon Aboriginal Shire         | RR[19] | 0.47        | 1.06        | 2.28        | 107        |
| Maranoa Regional                | RR[20] | 0.64        | 1.01        | 1.56        | 4870       |
| Mareeba Shire                   | RR[21] | 0.59        | 0.93        | 1.36        | 8361       |
| McKinlay Shire                  | RR[22] | 0.66        | 1.21        | 2.20        | 291        |
| Moreton Bay Regional            | RR[23] | 0.86        | 0.98        | 1.10        | 173749     |
| Mornington Shire                | RR[24] | 0.57        | 1.38        | 3.31        | 414        |
| Mount Isa City                  | RR[25] | <b>1.61</b> | <b>2.39</b> | <b>3.44</b> | 6814       |

|                                |        |      |      |      |        |
|--------------------------------|--------|------|------|------|--------|
| Murweh Shire                   | RR[26] | 0.47 | 0.87 | 1.46 | 1746   |
| Napranum Aboriginal Shire      | RR[27] | 0.53 | 1.10 | 2.24 | 332    |
| Noosa Shire                    | RR[28] | 0.78 | 1.07 | 1.42 | 22726  |
| North Burnett Regional         | RR[29] | 0.80 | 1.21 | 1.88 | 4214   |
| Northern Peninsula Area Region | RR[30] | 0.46 | 0.98 | 1.91 | 930    |
| Palm Island Aboriginal Shire   | RR[31] | 0.40 | 0.97 | 2.07 | 836    |
| Paroo Shire                    | RR[32] | 0.53 | 0.98 | 1.74 | 665    |
| Pormpuraaw Aboriginal Shire    | RR[33] | 0.58 | 1.19 | 2.42 | 276    |
| Quilpie Shire                  | RR[34] | 0.52 | 0.97 | 1.72 | 309    |
| Redland City                   | RR[35] | 0.81 | 0.99 | 1.20 | 61712  |
| Richmond Shire                 | RR[36] | 0.57 | 1.08 | 1.94 | 304    |
| Rockhampton Regional           | RR[37] | 0.72 | 0.94 | 1.21 | 32224  |
| Scenic Rim Regional            | RR[38] | 0.76 | 1.05 | 1.43 | 16567  |
| Somerset Regional              | RR[39] | 0.82 | 1.16 | 1.65 | 9734   |
| South Burnett Regional         | RR[40] | 0.90 | 1.25 | 1.72 | 13115  |
| Southern Downs Regional        | RR[41] | 0.71 | 1.01 | 1.40 | 14639  |
| Sunshine Coast Regional        | RR[42] | 0.89 | 1.02 | 1.17 | 126390 |
| Tablelands Regional            | RR[43] | 0.94 | 1.32 | 1.86 | 10440  |
| Toowoomba Regional             | RR[44] | 0.88 | 1.07 | 1.27 | 66432  |
| Torres Shire                   | RR[45] | 0.42 | 0.88 | 1.65 | 1346   |
| Torres Strait Island Regional  | RR[46] | 0.46 | 1.07 | 2.25 | 1450   |
| Townsville City                | RR[47] | 0.86 | 1.04 | 1.23 | 75031  |
| Weipa Town                     | RR[48] | 0.40 | 0.93 | 1.89 | 1320   |
| Western Downs Regional         | RR[49] | 0.90 | 1.25 | 1.73 | 12771  |
| Whitsunday Regional            | RR[50] | 0.59 | 0.87 | 1.24 | 13373  |
| Winton Shire                   | RR[51] | 0.76 | 1.29 | 2.32 | 449    |
| Woorabinda Aboriginal Shire    | RR[52] | 0.40 | 0.85 | 1.67 | 330    |
| Wujal Wujal Aboriginal Shire   | RR[53] | 0.47 | 1.01 | 2.07 | 114    |
| Yarrabah Aboriginal Shire      | RR[54] | 0.83 | 1.71 | 3.76 | 850    |

| LGA                             | SIR    | LL          | Median      | UL          | Population |
|---------------------------------|--------|-------------|-------------|-------------|------------|
| Aurukun Shire                   | RR[55] | 0.73        | 1.36        | 2.46        | 896        |
| Balonne Shire                   | RR[56] | 0.63        | 1.01        | 1.53        | 3433       |
| Banana Shire                    | RR[57] | 0.99        | 1.35        | 1.87        | 11152      |
| Barcaldine Regional             | RR[58] | 0.88        | 1.33        | 1.98        | 2281       |
| Barcoo Shire                    | RR[59] | 0.91        | 1.54        | 2.59        | 225        |
| Blackall Tambo Regional         | RR[60] | 0.93        | 1.45        | 2.29        | 1570       |
| Boulia Shire                    | RR[61] | <b>1.14</b> | <b>1.93</b> | <b>3.32</b> | 352        |
| Brisbane City                   | RR[62] | 0.94        | 0.99        | 1.05        | 931878     |
| Bulloo Shire                    | RR[63] | 0.79        | 1.40        | 2.47        | 297        |
| Bundaberg Regional              | RR[64] | <b>1.06</b> | <b>1.25</b> | <b>1.47</b> | 76491      |
| Burdekin Shire                  | RR[65] | <b>1.14</b> | <b>1.54</b> | <b>2.08</b> | 14040      |
| Burke Shire                     | RR[66] | 0.99        | 1.73        | 2.88        | 276        |
| Cairns Regional                 | RR[67] | 0.98        | 1.12        | 1.28        | 124800     |
| Carpentaria Shire               | RR[68] | <b>1.19</b> | <b>1.79</b> | <b>2.78</b> | 1553       |
| Cassowary Coast Regional        | RR[69] | <b>1.19</b> | <b>1.53</b> | <b>1.95</b> | 23460      |
| Central Highlands Regional      | RR[70] | 0.71        | 0.98        | 1.28        | 21079      |
| Charters Towers Regional        | RR[71] | 0.89        | 1.24        | 1.68        | 9321       |
| Cherbourg Aboriginal Shire      | RR[72] | 0.48        | 1.01        | 2.00        | 805        |
| Cloncurry Shire                 | RR[73] | <b>1.05</b> | <b>1.68</b> | <b>2.53</b> | 2418       |
| Cook Shire                      | RR[74] | <b>1.19</b> | <b>1.73</b> | <b>2.62</b> | 3442       |
| Croydon Shire                   | RR[75] | 0.88        | 1.50        | 2.53        | 237        |
| Diamantina Shire                | RR[76] | 0.98        | 1.73        | 3.11        | 237        |
| Doomadgee Aboriginal Shire      | RR[77] | 0.72        | 1.55        | 3.10        | 861        |
| Douglas Shire                   | RR[78] | 0.84        | 1.22        | 1.71        | 9781       |
| Etheridge Shire                 | RR[1]  | 0.91        | 1.43        | 2.27        | 647        |
| Flinders Shire                  | RR[2]  | 0.82        | 1.33        | 2.07        | 1270       |
| Fraser Coast Regional           | RR[3]  | <b>1.07</b> | <b>1.25</b> | <b>1.46</b> | 84462      |
| Gladstone Regional              | RR[4]  | 0.66        | 0.85        | 1.06        | 47696      |
| Gold Coast City                 | RR[5]  | 0.76        | 0.83        | 0.90        | 454869     |
| Goondiwindi Regional            | RR[6]  | 0.72        | 1.06        | 1.51        | 8360       |
| Gympie Regional                 | RR[7]  | 0.77        | 0.98        | 1.22        | 40504      |
| Hinchinbrook Shire              | RR[8]  | <b>1.14</b> | <b>1.58</b> | <b>2.21</b> | 9178       |
| Hope Vale Aboriginal Shire      | RR[9]  | 0.59        | 1.27        | 2.52        | 658        |
| Ipswich City                    | RR[10] | 0.79        | 0.91        | 1.04        | 147805     |
| Isaac Regional                  | RR[11] | 0.59        | 0.86        | 1.18        | 15636      |
| Kowanyama Aboriginal Shire      | RR[12] | 0.83        | 1.50        | 2.68        | 690        |
| Livingstone Shire               | RR[13] | <b>1.02</b> | <b>1.30</b> | <b>1.64</b> | 29422      |
| Lockhart River Aboriginal Shire | RR[14] | 0.61        | 1.32        | 2.66        | 488        |
| Lockyer Valley Regional         | RR[15] | 0.69        | 0.90        | 1.16        | 31066      |
| Logan City                      | RR[16] | 0.68        | 0.77        | 0.86        | 234853     |
| Longreach Regional              | RR[17] | <b>1.22</b> | <b>1.84</b> | <b>2.86</b> | 2961       |
| Mackay Regional                 | RR[18] | 0.94        | 1.11        | 1.29        | 91200      |
| Mapoon Aboriginal Shire         | RR[19] | 0.72        | 1.40        | 2.65        | 225        |
| Maranoa Regional                | RR[20] | 0.92        | 1.29        | 1.78        | 9908       |
| Mareeba Shire                   | RR[21] | <b>1.02</b> | <b>1.35</b> | <b>1.75</b> | 17681      |
| McKinlay Shire                  | RR[22] | <b>1.12</b> | <b>1.80</b> | <b>2.99</b> | 659        |
| Moreton Bay Regional            | RR[23] | 0.83        | 0.91        | 1.00        | 336169     |
| Mornington Shire                | RR[24] | 0.84        | 1.75        | 3.51        | 797        |
| Mount Isa City                  | RR[25] | <b>2.13</b> | <b>2.77</b> | <b>3.55</b> | 14196      |



|                                  |        |             |             |             |        |
|----------------------------------|--------|-------------|-------------|-------------|--------|
| Murweh Shire                     | RR[26] | <b>1.05</b> | <b>1.56</b> | <b>2.40</b> | 3404   |
| Napranum Aboriginal Shire        | RR[27] | 0.77        | 1.40        | 2.49        | 665    |
| Noosa Shire                      | RR[28] | 0.79        | 1.00        | 1.25        | 43701  |
| North Burnett Regional           | RR[29] | 0.87        | 1.21        | 1.68        | 8621   |
| Northern Peninsula Area Regional | RR[30] | 0.70        | 1.27        | 2.17        | 1769   |
| Palm Island Aboriginal Shire     | RR[31] | 0.48        | 1.01        | 1.90        | 1665   |
| Paroo Shire                      | RR[32] | 0.81        | 1.30        | 2.06        | 1329   |
| Pormpuraaw Aboriginal Shire      | RR[33] | 0.85        | 1.54        | 2.76        | 548    |
| Quilpie Shire                    | RR[34] | 0.98        | 1.57        | 2.58        | 644    |
| Redland City                     | RR[35] | 0.83        | 0.97        | 1.12        | 119406 |
| Richmond Shire                   | RR[36] | 0.86        | 1.43        | 2.31        | 644    |
| Rockhampton Regional             | RR[37] | 0.97        | 1.17        | 1.40        | 63150  |
| Scenic Rim Regional              | RR[38] | 0.72        | 0.94        | 1.20        | 32485  |
| Somerset Regional                | RR[39] | 0.93        | 1.22        | 1.61        | 19566  |
| South Burnett Regional           | RR[40] | <b>1.05</b> | <b>1.34</b> | <b>1.71</b> | 26057  |
| Southern Downs Regional          | RR[41] | 0.85        | 1.10        | 1.41        | 28497  |
| Sunshine Coast Regional          | RR[42] | 0.79        | 0.88        | 0.99        | 240988 |
| Tablelands Regional              | RR[43] | 0.97        | 1.27        | 1.64        | 20322  |
| Toowoomba Regional               | RR[44] | 0.87        | 1.00        | 1.15        | 128187 |
| Torres Shire                     | RR[45] | <b>1.01</b> | <b>1.64</b> | <b>2.64</b> | 2632   |
| Torres Strait Island Regional    | RR[46] | 0.81        | 1.50        | 2.59        | 2952   |
| Townsville City                  | RR[47] | 0.97        | 1.11        | 1.26        | 149049 |
| Weipa Town                       | RR[48] | 0.69        | 1.28        | 2.20        | 2868   |
| Western Downs Regional           | RR[49] | 0.80        | 1.04        | 1.34        | 26063  |
| Whitsunday Regional              | RR[50] | 0.81        | 1.06        | 1.37        | 27657  |
| Winton Shire                     | RR[51] | <b>1.16</b> | <b>1.77</b> | <b>2.78</b> | 950    |
| Woorabinda Aboriginal Shire      | RR[52] | 0.58        | 1.06        | 1.86        | 638    |
| Wujal Wujal Aboriginal Shire     | RR[53] | 0.87        | 1.57        | 2.96        | 220    |
| Yarrabah Aboriginal Shire        | RR[54] | 0.56        | 1.12        | 2.07        | 1692   |

| LGA                             | SIR    | LL          | Median      | UL          | Population |
|---------------------------------|--------|-------------|-------------|-------------|------------|
| Aurukun Shire                   | RR[55] | 0.76        | 1.48        | 2.84        | 896        |
| Balonne Shire                   | RR[56] | 1.00        | 1.70        | 2.84        | 3433       |
| Banana Shire                    | RR[57] | 0.50        | 0.83        | 1.31        | 11152      |
| Barcaldine Regional             | RR[58] | 0.71        | 1.31        | 2.35        | 2281       |
| Barcoo Shire                    | RR[59] | 0.40        | 0.97        | 2.21        | 225        |
| Blackall Tambo Regional         | RR[60] | 0.74        | 1.47        | 2.78        | 1570       |
| Boulia Shire                    | RR[61] | 0.47        | 0.96        | 1.95        | 352        |
| Brisbane City                   | RR[62] | 0.79        | 0.84        | 0.90        | 931878     |
| Bulloo Shire                    | RR[63] | 0.39        | 1.24        | 3.41        | 297        |
| Bundaberg Regional              | RR[64] | <b>1.05</b> | <b>1.26</b> | <b>1.49</b> | 76491      |
| Burdekin Shire                  | RR[65] | <b>1.09</b> | <b>1.55</b> | <b>2.14</b> | 14040      |
| Burke Shire                     | RR[66] | 0.59        | 1.43        | 3.40        | 276        |
| Cairns Regional                 | RR[67] | <b>1.20</b> | <b>1.37</b> | <b>1.57</b> | 124800     |
| Carpentaria Shire               | RR[68] | <b>1.80</b> | <b>3.57</b> | <b>6.63</b> | 1553       |
| Cassowary Coast Regional        | RR[69] | <b>1.33</b> | <b>1.74</b> | <b>2.25</b> | 23460      |
| Central Highlands Regional      | RR[70] | 0.53        | 0.79        | 1.13        | 21079      |
| Charters Towers Regional        | RR[71] | <b>1.35</b> | <b>1.98</b> | <b>2.82</b> | 9321       |
| Cherbourg Aboriginal Shire      | RR[72] | 0.53        | 1.26        | 2.80        | 805        |
| Cloncurry Shire                 | RR[73] | <b>1.06</b> | <b>2.01</b> | <b>3.61</b> | 2418       |
| Cook Shire                      | RR[74] | <b>1.76</b> | <b>2.82</b> | <b>4.45</b> | 3442       |
| Croydon Shire                   | RR[75] | 0.68        | 1.40        | 2.81        | 237        |
| Diamantina Shire                | RR[76] | 0.62        | 1.30        | 2.70        | 237        |
| Doomadgee Aboriginal Shire      | RR[77] | 0.40        | 0.89        | 1.88        | 861        |
| Douglas Shire                   | RR[78] | <b>1.01</b> | <b>1.58</b> | <b>2.35</b> | 9781       |
| Etheridge Shire                 | RR[1]  | 0.56        | 1.22        | 2.62        | 647        |
| Flinders Shire                  | RR[2]  | 0.84        | 1.62        | 3.00        | 1270       |
| Fraser Coast Regional           | RR[3]  | <b>1.03</b> | <b>1.23</b> | <b>1.45</b> | 84462      |
| Gladstone Regional              | RR[4]  | 0.68        | 0.89        | 1.15        | 47696      |
| Gold Coast City                 | RR[5]  | 0.96        | 1.04        | 1.13        | 454869     |
| Goondiwindi Regional            | RR[6]  | <b>1.02</b> | <b>1.60</b> | <b>2.40</b> | 8360       |
| Gympie Regional                 | RR[7]  | 0.64        | 0.86        | 1.14        | 40504      |
| Hinchinbrook Shire              | RR[8]  | <b>1.64</b> | <b>2.35</b> | <b>3.27</b> | 9178       |
| Hope Vale Aboriginal Shire      | RR[9]  | 0.43        | 1.08        | 2.43        | 658        |
| Ipswich City                    | RR[10] | 0.82        | 0.96        | 1.11        | 147805     |
| Isaac Regional                  | RR[11] | 0.65        | 0.99        | 1.44        | 15636      |
| Kowanyama Aboriginal Shire      | RR[12] | 0.78        | 1.57        | 3.14        | 690        |
| Livingstone Shire               | RR[13] | 1.00        | 1.32        | 1.71        | 29422      |
| Lockhart River Aboriginal Shire | RR[14] | 0.50        | 1.06        | 2.15        | 488        |
| Lockyer Valley Regional         | RR[15] | 0.65        | 0.90        | 1.20        | 31066      |
| Logan City                      | RR[16] | 0.69        | 0.79        | 0.89        | 234853     |
| Longreach Regional              | RR[17] | 0.86        | 1.55        | 2.68        | 2961       |
| Mackay Regional                 | RR[18] | <b>1.04</b> | <b>1.23</b> | <b>1.45</b> | 91200      |
| Mapoon Aboriginal Shire         | RR[19] | 0.59        | 1.23        | 2.45        | 225        |
| Maranoa Regional                | RR[20] | 0.92        | 1.42        | 2.09        | 9908       |
| Mareeba Shire                   | RR[21] | <b>1.04</b> | <b>1.48</b> | <b>2.03</b> | 17681      |
| McKinlay Shire                  | RR[22] | 0.73        | 1.42        | 2.82        | 659        |
| Moreton Bay Regional            | RR[23] | 0.71        | 0.79        | 0.88        | 336169     |
| Mornington Shire                | RR[24] | 0.46        | 1.29        | 3.14        | 797        |
| Mount Isa City                  | RR[25] | <b>1.53</b> | <b>2.09</b> | <b>2.79</b> | 14196      |

|                                  |        |             |             |             |        |
|----------------------------------|--------|-------------|-------------|-------------|--------|
| Murweh Shire                     | RR[26] | 0.72        | 1.31        | 2.28        | 3404   |
| Napranum Aboriginal Shire        | RR[27] | 0.63        | 1.24        | 2.30        | 665    |
| Noosa Shire                      | RR[28] | 1.00        | 1.27        | 1.59        | 43701  |
| North Burnett Regional           | RR[29] | 0.73        | 1.21        | 1.90        | 8621   |
| Northern Peninsula Area Regional | RR[30] | 0.28        | 0.81        | 1.89        | 1769   |
| Palm Island Aboriginal Shire     | RR[31] | 0.39        | 0.93        | 1.93        | 1665   |
| Paroo Shire                      | RR[32] | 0.75        | 1.55        | 2.98        | 1329   |
| Pormpuraaw Aboriginal Shire      | RR[33] | 0.91        | 1.76        | 3.49        | 548    |
| Quilpie Shire                    | RR[34] | 0.79        | 1.51        | 2.91        | 644    |
| Redland City                     | RR[35] | 0.90        | 1.06        | 1.23        | 119406 |
| Richmond Shire                   | RR[36] | 0.61        | 1.26        | 2.48        | 644    |
| Rockhampton Regional             | RR[37] | <b>1.06</b> | <b>1.29</b> | <b>1.55</b> | 63150  |
| Scenic Rim Regional              | RR[38] | 0.71        | 0.97        | 1.28        | 32485  |
| Somerset Regional                | RR[39] | 0.88        | 1.24        | 1.70        | 19566  |
| South Burnett Regional           | RR[40] | 0.69        | 0.97        | 1.32        | 26057  |
| Southern Downs Regional          | RR[41] | 0.80        | 1.10        | 1.46        | 28497  |
| Sunshine Coast Regional          | RR[42] | 0.80        | 0.91        | 1.02        | 240988 |
| Tablelands Regional              | RR[43] | <b>1.16</b> | <b>1.57</b> | <b>2.08</b> | 20322  |
| Toowoomba Regional               | RR[44] | 0.71        | 0.84        | 0.99        | 128187 |
| Torres Shire                     | RR[45] | 0.71        | 1.36        | 2.47        | 2632   |
| Torres Strait Island Regional    | RR[46] | 0.82        | 1.43        | 2.37        | 2952   |
| Townsville City                  | RR[47] | 0.87        | 1.00        | 1.15        | 149049 |
| Weipa Town                       | RR[48] | 0.23        | 0.64        | 1.43        | 2868   |
| Western Downs Regional           | RR[49] | 0.89        | 1.20        | 1.59        | 26063  |
| Whitsunday Regional              | RR[50] | <b>1.06</b> | <b>1.38</b> | <b>1.78</b> | 27657  |
| Winton Shire                     | RR[51] | <b>1.09</b> | <b>2.15</b> | <b>4.36</b> | 950    |
| Woorabinda Aboriginal Shire      | RR[52] | 0.68        | 1.46        | 3.10        | 638    |
| Wujal Wujal Aboriginal Shire     | RR[53] | 0.62        | 1.81        | 5.49        | 220    |
| Yarrabah Aboriginal Shire        | RR[54] | <b>2.09</b> | <b>3.76</b> | <b>6.61</b> | 1692   |

| LGA                              | SMR    | LL          | Median      | UL          | Population |
|----------------------------------|--------|-------------|-------------|-------------|------------|
| Aurukun Shire                    | RR[55] | 0.93        | 1.91        | 3.75        | 896        |
| Balonne Shire                    | RR[56] | 0.79        | 1.34        | 2.16        | 3433       |
| Banana Shire                     | RR[57] | <b>1.03</b> | <b>1.45</b> | <b>2.01</b> | 11152      |
| Barcaldine Regional              | RR[58] | <b>1.08</b> | <b>1.78</b> | <b>2.86</b> | 2281       |
| Barcoo Shire                     | RR[59] | 0.90        | 1.82        | 3.55        | 225        |
| Blackall Tambo Regional          | RR[60] | <b>1.11</b> | <b>1.92</b> | <b>3.27</b> | 1570       |
| Boulia Shire                     | RR[61] | <b>1.20</b> | <b>2.37</b> | <b>4.61</b> | 352        |
| Brisbane City                    | RR[62] | 0.94        | 0.99        | 1.05        | 931878     |
| Bulloo Shire                     | RR[63] | 0.77        | 1.64        | 3.36        | 297        |
| Bundaberg Regional               | RR[64] | <b>1.06</b> | <b>1.25</b> | <b>1.45</b> | 76491      |
| Burdekin Shire                   | RR[65] | <b>1.53</b> | <b>2.03</b> | <b>2.65</b> | 14040      |
| Burke Shire                      | RR[66] | <b>1.13</b> | <b>2.23</b> | <b>4.34</b> | 276        |
| Cairns Regional                  | RR[67] | <b>1.05</b> | <b>1.20</b> | <b>1.35</b> | 124800     |
| Carpentaria Shire                | RR[68] | <b>1.55</b> | <b>2.55</b> | <b>4.17</b> | 1553       |
| Cassowary Coast Regional         | RR[69] | <b>1.54</b> | <b>1.94</b> | <b>2.40</b> | 23460      |
| Central Highlands Regional       | RR[70] | 0.64        | 0.90        | 1.22        | 21079      |
| Charters Towers Regional         | RR[71] | <b>1.50</b> | <b>2.06</b> | <b>2.79</b> | 9321       |
| Cherbourg Aboriginal Shire       | RR[72] | 0.41        | 1.03        | 2.37        | 805        |
| Cloncurry Shire                  | RR[73] | <b>1.22</b> | <b>2.06</b> | <b>3.27</b> | 2418       |
| Cook Shire                       | RR[74] | <b>2.21</b> | <b>3.37</b> | <b>5.06</b> | 3442       |
| Croydon Shire                    | RR[75] | 0.90        | 1.83        | 3.61        | 237        |
| Diamantina Shire                 | RR[76] | 0.89        | 1.91        | 3.95        | 237        |
| Doomadgee Aboriginal Shire       | RR[77] | 0.50        | 1.33        | 2.97        | 861        |
| Douglas Shire                    | RR[78] | 0.92        | 1.36        | 1.93        | 9781       |
| Etheridge Shire                  | RR[1]  | 0.98        | 1.80        | 3.23        | 647        |
| Flinders Shire                   | RR[2]  | <b>1.05</b> | <b>1.88</b> | <b>3.23</b> | 1270       |
| Fraser Coast Regional            | RR[3]  | <b>1.11</b> | <b>1.29</b> | <b>1.49</b> | 84462      |
| Gladstone Regional               | RR[4]  | 0.71        | 0.89        | 1.11        | 47696      |
| Gold Coast City                  | RR[5]  | 0.77        | 0.84        | 0.91        | 454869     |
| Goondiwindi Regional             | RR[6]  | 0.79        | 1.20        | 1.77        | 8360       |
| Gympie Regional                  | RR[7]  | 0.68        | 0.87        | 1.10        | 40504      |
| Hinchinbrook Shire               | RR[8]  | <b>1.62</b> | <b>2.23</b> | <b>3.02</b> | 9178       |
| Hope Vale Aboriginal Shire       | RR[9]  | 0.53        | 1.36        | 3.07        | 658        |
| Ipswich City                     | RR[10] | 0.70        | 0.81        | 0.93        | 147805     |
| Isaac Regional                   | RR[11] | 0.70        | 1.01        | 1.40        | 15636      |
| Kowanyama Aboriginal Shire       | RR[12] | 0.95        | 1.97        | 3.89        | 690        |
| Livingstone Shire                | RR[13] | 0.92        | 1.19        | 1.51        | 29422      |
| Lockhart River Aboriginal Shire  | RR[14] | 0.56        | 1.46        | 3.38        | 488        |
| Lockyer Valley Regional          | RR[15] | 0.71        | 0.94        | 1.21        | 31066      |
| Logan City                       | RR[16] | 0.57        | 0.65        | 0.73        | 234853     |
| Longreach Regional               | RR[17] | <b>1.38</b> | <b>2.22</b> | <b>3.45</b> | 2961       |
| Mackay Regional                  | RR[18] | <b>1.03</b> | <b>1.20</b> | <b>1.39</b> | 91200      |
| Mapoon Aboriginal Shire          | RR[19] | 0.72        | 1.68        | 3.74        | 225        |
| Maranoa Regional                 | RR[20] | <b>1.20</b> | <b>1.68</b> | <b>2.32</b> | 9908       |
| Mareeba Shire                    | RR[21] | <b>1.04</b> | <b>1.40</b> | <b>1.84</b> | 17681      |
| McKinlay Shire                   | RR[22] | <b>1.41</b> | <b>2.57</b> | <b>4.74</b> | 659        |
| Moreton Bay Regional             | RR[23] | 0.72        | 0.80        | 0.88        | 336169     |
| Mornington Shire                 | RR[24] | 0.78        | 1.87        | 4.02        | 797        |
| Mount Isa City                   | RR[25] | <b>2.40</b> | <b>3.04</b> | <b>3.80</b> | 14196      |
| Murweh Shire                     | RR[26] | <b>1.33</b> | <b>2.10</b> | <b>3.24</b> | 3404       |
| Napranum Aboriginal Shire        | RR[27] | 0.79        | 1.68        | 3.31        | 665        |
| Noosa Shire                      | RR[28] | 0.71        | 0.91        | 1.15        | 43701      |
| North Burnett Regional           | RR[29] | 0.85        | 1.26        | 1.82        | 8621       |
| Northern Peninsula Area Regional | RR[30] | 0.50        | 1.09        | 2.07        | 1769       |
| Palm Island Aboriginal Shire     | RR[31] | 0.38        | 0.95        | 1.98        | 1665       |
| Paroo Shire                      | RR[32] | 0.94        | 1.70        | 2.97        | 1329       |
| Porpuraaw Aboriginal Shire       | RR[33] | <b>1.14</b> | <b>2.33</b> | <b>4.73</b> | 548        |
| Quilpie Shire                    | RR[34] | <b>1.16</b> | <b>2.13</b> | <b>3.92</b> | 644        |

|                               |        |             |             |             |        |
|-------------------------------|--------|-------------|-------------|-------------|--------|
| Redland City                  | RR[35] | 0.70        | 0.83        | 0.96        | 119406 |
| Richmond Shire                | RR[36] | 0.84        | 1.66        | 3.04        | 644    |
| Rockhampton Regional          | RR[37] | <b>1.14</b> | <b>1.35</b> | <b>1.58</b> | 63150  |
| Scenic Rim Regional           | RR[38] | 0.69        | 0.91        | 1.17        | 32485  |
| Somerset Regional             | RR[39] | 0.82        | 1.12        | 1.49        | 19566  |
| South Burnett Regional        | RR[40] | 0.96        | 1.24        | 1.59        | 26057  |
| Southern Downs Regional       | RR[41] | 0.91        | 1.19        | 1.51        | 28497  |
| Sunshine Coast Regional       | RR[42] | 0.73        | 0.82        | 0.91        | 240988 |
| Tablelands Regional           | RR[43] | <b>1.23</b> | <b>1.60</b> | <b>2.04</b> | 20322  |
| Toowoomba Regional            | RR[44] | 0.85        | 0.98        | 1.12        | 128187 |
| Torres Shire                  | RR[45] | 0.90        | 1.61        | 2.69        | 2632   |
| Torres Strait Island Regional | RR[46] | 0.70        | 1.38        | 2.49        | 2952   |
| Townsville City               | RR[47] | 0.99        | 1.12        | 1.26        | 149049 |
| Weipa Town                    | RR[48] | 0.63        | 1.26        | 2.28        | 2868   |
| Western Downs Regional        | RR[49] | 0.91        | 1.19        | 1.53        | 26063  |
| Whitsunday Regional           | RR[50] | <b>1.08</b> | <b>1.38</b> | <b>1.74</b> | 27657  |
| Winton Shire                  | RR[51] | <b>1.73</b> | <b>2.92</b> | <b>5.12</b> | 950    |
| Woorabinda Aboriginal Shire   | RR[52] | 0.57        | 1.23        | 2.53        | 638    |
| Wujal Wujal Aboriginal Shire  | RR[53] | <b>1.33</b> | <b>2.81</b> | <b>6.44</b> | 220    |
| Yarrabah Aboriginal Shire     | RR[54] | <b>2.16</b> | <b>3.80</b> | <b>6.39</b> | 1692   |

| LGA                              | SMR    | LL   | Median | UL   | Population |
|----------------------------------|--------|------|--------|------|------------|
| Aurukun Shire                    | RR[55] | 1.14 | 2.47   | 5.09 | 896        |
| Balonne Shire                    | RR[56] | 0.84 | 1.48   | 2.53 | 3433       |
| Banana Shire                     | RR[57] | 1.14 | 1.68   | 2.40 | 11152      |
| Barcaldine Regional              | RR[58] | 1.16 | 2.00   | 3.37 | 2281       |
| Barcoo Shire                     | RR[59] | 0.94 | 2.01   | 4.14 | 225        |
| Blackall Tambo Regional          | RR[60] | 1.05 | 1.95   | 3.48 | 1570       |
| Boulia Shire                     | RR[61] | 1.36 | 2.83   | 5.81 | 352        |
| Brisbane City                    | RR[62] | 0.89 | 0.95   | 1.01 | 931878     |
| Bulloo Shire                     | RR[63] | 0.78 | 1.78   | 3.93 | 297        |
| Bundaberg Regional               | RR[64] | 1.04 | 1.25   | 1.50 | 76491      |
| Burdekin Shire                   | RR[65] | 1.72 | 2.36   | 3.16 | 14040      |
| Burke Shire                      | RR[66] | 1.14 | 2.42   | 4.95 | 276        |
| Cairns Regional                  | RR[67] | 1.12 | 1.30   | 1.50 | 124800     |
| Carpentaria Shire                | RR[68] | 1.79 | 3.07   | 5.24 | 1553       |
| Cassowary Coast Regional         | RR[69] | 1.59 | 2.07   | 2.65 | 23460      |
| Central Highlands Regional       | RR[70] | 0.62 | 0.92   | 1.31 | 21079      |
| Charters Towers Regional         | RR[71] | 1.59 | 2.26   | 3.17 | 9321       |
| Cherbourg Aboriginal Shire       | RR[72] | 0.41 | 1.11   | 2.78 | 805        |
| Cloncurry Shire                  | RR[73] | 1.39 | 2.43   | 4.02 | 2418       |
| Cook Shire                       | RR[74] | 2.66 | 4.18   | 6.43 | 3442       |
| Croydon Shire                    | RR[75] | 0.97 | 2.09   | 4.35 | 237        |
| Diamantina Shire                 | RR[76] | 0.95 | 2.18   | 4.80 | 237        |
| Doomadgee Aboriginal Shire       | RR[77] | 0.53 | 1.53   | 3.69 | 861        |
| Douglas Shire                    | RR[78] | 1.03 | 1.59   | 2.33 | 9781       |
| Etheridge Shire                  | RR[1]  | 0.96 | 1.88   | 3.54 | 647        |
| Flinders Shire                   | RR[2]  | 1.20 | 2.23   | 4.03 | 1270       |
| Fraser Coast Regional            | RR[3]  | 1.04 | 1.25   | 1.49 | 84462      |
| Gladstone Regional               | RR[4]  | 0.66 | 0.87   | 1.13 | 47696      |
| Gold Coast City                  | RR[5]  | 0.74 | 0.82   | 0.90 | 454869     |
| Goondiwindi Regional             | RR[6]  | 0.69 | 1.13   | 1.78 | 8360       |
| Gympie Regional                  | RR[7]  | 0.62 | 0.84   | 1.11 | 40504      |
| Hinchinbrook Shire               | RR[8]  | 1.57 | 2.28   | 3.23 | 9178       |
| Hope Vale Aboriginal Shire       | RR[9]  | 0.59 | 1.64   | 3.96 | 658        |
| Ipswich City                     | RR[10] | 0.66 | 0.78   | 0.92 | 147805     |
| Isaac Regional                   | RR[11] | 0.67 | 1.02   | 1.48 | 15636      |
| Kowanyama Aboriginal Shire       | RR[12] | 1.12 | 2.45   | 5.14 | 690        |
| Livingstone Shire                | RR[13] | 0.88 | 1.20   | 1.58 | 29422      |
| Lockhart River Aboriginal Shire  | RR[14] | 0.63 | 1.76   | 4.41 | 488        |
| Lockyer Valley Regional          | RR[15] | 0.75 | 1.02   | 1.37 | 31066      |
| Logan City                       | RR[16] | 0.54 | 0.63   | 0.73 | 234853     |
| Longreach Regional               | RR[17] | 1.48 | 2.50   | 4.08 | 2961       |
| Mackay Regional                  | RR[18] | 0.99 | 1.19   | 1.41 | 91200      |
| Mapoon Aboriginal Shire          | RR[19] | 0.82 | 2.06   | 4.91 | 225        |
| Maranoa Regional                 | RR[20] | 1.12 | 1.66   | 2.40 | 9908       |
| Mareeba Shire                    | RR[21] | 1.02 | 1.45   | 1.98 | 17681      |
| McKinlay Shire                   | RR[22] | 1.51 | 2.90   | 5.59 | 659        |
| Moreton Bay Regional             | RR[23] | 0.72 | 0.81   | 0.90 | 336169     |
| Mornington Shire                 | RR[24] | 0.88 | 2.29   | 5.26 | 797        |
| Mount Isa City                   | RR[25] | 2.75 | 3.58   | 4.57 | 14196      |
| Murweh Shire                     | RR[26] | 1.35 | 2.25   | 3.66 | 3404       |
| Napranum Aboriginal Shire        | RR[27] | 0.94 | 2.09   | 4.38 | 665        |
| Noosa Shire                      | RR[28] | 0.72 | 0.96   | 1.25 | 43701      |
| North Burnett Regional           | RR[29] | 0.78 | 1.22   | 1.86 | 8621       |
| Northern Peninsula Area Regional | RR[30] | 0.58 | 1.34   | 2.67 | 1769       |
| Palm Island Aboriginal Shire     | RR[31] | 0.39 | 1.05   | 2.37 | 1665       |
| Paroo Shire                      | RR[32] | 1.04 | 1.96   | 3.62 | 1329       |
| Pormpuraaw Aboriginal Shire      | RR[33] | 1.36 | 2.97   | 6.36 | 548        |
| Quilpie Shire                    | RR[34] | 1.04 | 2.05   | 3.96 | 644        |

|                               |        |             |             |             |        |
|-------------------------------|--------|-------------|-------------|-------------|--------|
| Redland City                  | RR[35] | 0.61        | 0.74        | 0.90        | 119406 |
| Richmond Shire                | RR[36] | 0.91        | 1.89        | 3.66        | 644    |
| Rockhampton Regional          | RR[37] | <b>1.18</b> | <b>1.44</b> | <b>1.73</b> | 63150  |
| Scenic Rim Regional           | RR[38] | 0.69        | 0.95        | 1.27        | 32485  |
| Somerset Regional             | RR[39] | 0.85        | 1.20        | 1.66        | 19566  |
| South Burnett Regional        | RR[40] | 0.85        | 1.17        | 1.57        | 26057  |
| Southern Downs Regional       | RR[41] | 0.89        | 1.21        | 1.61        | 28497  |
| Sunshine Coast Regional       | RR[42] | 0.70        | 0.80        | 0.91        | 240988 |
| Tablelands Regional           | RR[43] | <b>1.20</b> | <b>1.63</b> | <b>2.16</b> | 20322  |
| Toowoomba Regional            | RR[44] | 0.82        | 0.97        | 1.14        | 128187 |
| Torres Shire                  | RR[45] | <b>1.15</b> | <b>2.11</b> | <b>3.66</b> | 2632   |
| Torres Strait Island Regional | RR[46] | 0.80        | 1.68        | 3.17        | 2952   |
| Townsville City               | RR[47] | <b>1.02</b> | <b>1.18</b> | <b>1.35</b> | 149049 |
| Weipa Town                    | RR[48] | 0.78        | 1.64        | 3.08        | 2868   |
| Western Downs Regional        | RR[49] | 0.91        | 1.24        | 1.64        | 26063  |
| Whitsunday Regional           | RR[50] | <b>1.04</b> | <b>1.39</b> | <b>1.82</b> | 27657  |
| Winton Shire                  | RR[51] | <b>1.79</b> | <b>3.18</b> | <b>5.80</b> | 950    |
| Woorabinda Aboriginal Shire   | RR[52] | 0.58        | 1.35        | 2.96        | 638    |
| Wujal Wujal Aboriginal Shire  | RR[53] | <b>1.15</b> | <b>2.65</b> | <b>6.25</b> | 220    |
| Yarrabah Aboriginal Shire     | RR[54] | <b>2.92</b> | <b>5.32</b> | <b>9.02</b> | 1692   |

| LGA                              | SMR    | LL          | Median      | UL          | Population |
|----------------------------------|--------|-------------|-------------|-------------|------------|
| Aurukun Shire                    | RR[55] | <b>1.23</b> | <b>2.76</b> | <b>5.83</b> | 896        |
| Balonne Shire                    | RR[56] | 0.79        | 1.46        | 2.56        | 3433       |
| Banana Shire                     | RR[57] | <b>1.23</b> | <b>1.82</b> | <b>2.64</b> | 11152      |
| Barcaldine Regional              | RR[58] | <b>1.11</b> | <b>1.97</b> | <b>3.42</b> | 2281       |
| Barcoo Shire                     | RR[59] | 0.90        | 1.99        | 4.23        | 225        |
| Blackall Tambo Regional          | RR[60] | <b>1.05</b> | <b>1.99</b> | <b>3.70</b> | 1570       |
| Boulia Shire                     | RR[61] | <b>1.41</b> | <b>3.02</b> | <b>6.45</b> | 352        |
| Brisbane City                    | RR[62] | 0.89        | 0.96        | 1.02        | 931878     |
| Bulloo Shire                     | RR[63] | 0.74        | 1.73        | 3.96        | 297        |
| Bundaberg Regional               | RR[64] | <b>1.08</b> | <b>1.32</b> | <b>1.60</b> | 76491      |
| Burdekin Shire                   | RR[65] | <b>1.82</b> | <b>2.54</b> | <b>3.45</b> | 14040      |
| Burke Shire                      | RR[66] | <b>1.20</b> | <b>2.62</b> | <b>5.53</b> | 276        |
| Cairns Regional                  | RR[67] | <b>1.11</b> | <b>1.31</b> | <b>1.52</b> | 124800     |
| Carpentaria Shire                | RR[68] | <b>1.83</b> | <b>3.22</b> | <b>5.61</b> | 1553       |
| Cassowary Coast Regional         | RR[69] | <b>1.66</b> | <b>2.20</b> | <b>2.85</b> | 23460      |
| Central Highlands Regional       | RR[70] | 0.54        | 0.85        | 1.25        | 21079      |
| Charters Towers Regional         | RR[71] | <b>1.59</b> | <b>2.33</b> | <b>3.33</b> | 9321       |
| Cherbourg Aboriginal Shire       | RR[72] | 0.40        | 1.14        | 3.01        | 805        |
| Cloncurry Shire                  | RR[73] | <b>1.38</b> | <b>2.51</b> | <b>4.26</b> | 2418       |
| Cook Shire                       | RR[74] | <b>2.72</b> | <b>4.32</b> | <b>6.76</b> | 3442       |
| Croydon Shire                    | RR[75] | 0.99        | 2.21        | 4.77        | 237        |
| Diamantina Shire                 | RR[76] | 0.95        | 2.24        | 5.13        | 237        |
| Doomadgee Aboriginal Shire       | RR[77] | 0.54        | 1.65        | 4.14        | 861        |
| Douglas Shire                    | RR[78] | <b>1.17</b> | <b>1.81</b> | <b>2.67</b> | 9781       |
| Etheridge Shire                  | RR[1]  | 0.99        | 1.98        | 3.85        | 647        |
| Flinders Shire                   | RR[2]  | <b>1.12</b> | <b>2.18</b> | <b>4.08</b> | 1270       |
| Fraser Coast Regional            | RR[3]  | <b>1.05</b> | <b>1.28</b> | <b>1.54</b> | 84462      |
| Gladstone Regional               | RR[4]  | 0.63        | 0.86        | 1.15        | 47696      |
| Gold Coast City                  | RR[5]  | 0.69        | 0.77        | 0.86        | 454869     |
| Goondiwindi Regional             | RR[6]  | 0.60        | 1.03        | 1.68        | 8360       |
| Gympie Regional                  | RR[7]  | 0.57        | 0.80        | 1.09        | 40504      |
| Hinchinbrook Shire               | RR[8]  | <b>1.52</b> | <b>2.28</b> | <b>3.30</b> | 9178       |
| Hope Vale Aboriginal Shire       | RR[9]  | 0.61        | 1.77        | 4.40        | 658        |
| Ipswich City                     | RR[10] | 0.66        | 0.80        | 0.95        | 147805     |
| Isaac Regional                   | RR[11] | 0.63        | 0.99        | 1.48        | 15636      |
| Kowanyama Aboriginal Shire       | RR[12] | <b>1.20</b> | <b>2.70</b> | <b>5.83</b> | 690        |
| Livingstone Shire                | RR[13] | 0.83        | 1.15        | 1.57        | 29422      |
| Lockhart River Aboriginal Shire  | RR[14] | 0.64        | 1.89        | 4.92        | 488        |
| Lockyer Valley Regional          | RR[15] | 0.76        | 1.06        | 1.44        | 31066      |
| Logan City                       | RR[16] | 0.54        | 0.64        | 0.75        | 234853     |
| Longreach Regional               | RR[17] | <b>1.26</b> | <b>2.22</b> | <b>3.79</b> | 2961       |
| Mackay Regional                  | RR[18] | 0.96        | 1.17        | 1.41        | 91200      |
| Mapoon Aboriginal Shire          | RR[19] | 0.86        | 2.23        | 5.52        | 225        |
| Maranoa Regional                 | RR[20] | <b>1.12</b> | <b>1.71</b> | <b>2.53</b> | 9908       |
| Mareeba Shire                    | RR[21] | <b>1.16</b> | <b>1.65</b> | <b>2.28</b> | 17681      |
| McKinlay Shire                   | RR[22] | <b>1.60</b> | <b>3.16</b> | <b>6.27</b> | 659        |
| Moreton Bay Regional             | RR[23] | 0.68        | 0.77        | 0.87        | 336169     |
| Mornington Shire                 | RR[24] | 0.95        | 2.54        | 6.03        | 797        |
| Mount Isa City                   | RR[25] | <b>2.92</b> | <b>3.84</b> | <b>4.96</b> | 14196      |
| Murweh Shire                     | RR[26] | <b>1.23</b> | <b>2.14</b> | <b>3.62</b> | 3404       |
| Napranum Aboriginal Shire        | RR[27] | 0.99        | 2.30        | 4.97        | 665        |
| Noosa Shire                      | RR[28] | 0.61        | 0.85        | 1.14        | 43701      |
| North Burnett Regional           | RR[29] | 0.80        | 1.28        | 1.99        | 8621       |
| Northern Peninsula Area Regional | RR[30] | 0.62        | 1.46        | 3.00        | 1769       |
| Palm Island Aboriginal Shire     | RR[31] | 0.38        | 1.09        | 2.55        | 1665       |
| Paroo Shire                      | RR[32] | 0.93        | 1.84        | 3.51        | 1329       |
| Porpuraaw Aboriginal Shire       | RR[33] | <b>1.47</b> | <b>3.32</b> | <b>7.32</b> | 548        |
| Quilpie Shire                    | RR[34] | 0.89        | 1.85        | 3.69        | 644        |



|                               |        |             |             |             |        |
|-------------------------------|--------|-------------|-------------|-------------|--------|
| Redland City                  | RR[35] | 0.57        | 0.71        | 0.87        | 119406 |
| Richmond Shire                | RR[36] | 0.92        | 1.99        | 3.97        | 644    |
| Rockhampton Regional          | RR[37] | <b>1.11</b> | <b>1.37</b> | <b>1.69</b> | 63150  |
| Scenic Rim Regional           | RR[38] | 0.71        | 1.00        | 1.36        | 32485  |
| Somerset Regional             | RR[39] | 0.88        | 1.27        | 1.79        | 19566  |
| South Burnett Regional        | RR[40] | 0.81        | 1.15        | 1.57        | 26057  |
| Southern Downs Regional       | RR[41] | 0.79        | 1.11        | 1.52        | 28497  |
| Sunshine Coast Regional       | RR[42] | 0.66        | 0.77        | 0.89        | 240988 |
| Tablelands Regional           | RR[43] | <b>1.19</b> | <b>1.66</b> | <b>2.24</b> | 20322  |
| Toowoomba Regional            | RR[44] | 0.85        | 1.02        | 1.21        | 128187 |
| Torres Shire                  | RR[45] | <b>1.29</b> | <b>2.42</b> | <b>4.26</b> | 2632   |
| Torres Strait Island Regional | RR[46] | 0.91        | 1.93        | 3.67        | 2952   |
| Townsville City               | RR[47] | <b>1.03</b> | <b>1.20</b> | <b>1.39</b> | 149049 |
| Weipa Town                    | RR[48] | 0.72        | 1.61        | 3.16        | 2868   |
| Western Downs Regional        | RR[49] | 1.00        | 1.37        | 1.84        | 26063  |
| Whitsunday Regional           | RR[50] | <b>1.05</b> | <b>1.43</b> | <b>1.91</b> | 27657  |
| Winton Shire                  | RR[51] | <b>1.89</b> | <b>3.43</b> | <b>6.47</b> | 950    |
| Woorabinda Aboriginal Shire   | RR[52] | 0.56        | 1.35        | 3.09        | 638    |
| Wujal Wujal Aboriginal Shire  | RR[53] | <b>1.24</b> | <b>2.95</b> | <b>7.26</b> | 220    |
| Yarrabah Aboriginal Shire     | RR[54] | <b>3.07</b> | <b>5.74</b> | <b>9.98</b> | 1692   |

| <b>LGA</b>                         | <b>SIR</b> | <b>LL</b> | <b>Median</b> | <b>UL</b> | <b>Population</b> |
|------------------------------------|------------|-----------|---------------|-----------|-------------------|
| Abbeywood                          | RR[1]      | 0.29      | 0.91          | 2.80      | 20                |
| Abbotsford (Qld)                   | RR[2]      | 0.29      | 0.87          | 2.46      | 3                 |
| Abercorn                           | RR[3]      | 0.27      | 0.82          | 2.34      | 34                |
| Abergowrie                         | RR[4]      | 0.44      | 1.22          | 2.96      | 327               |
| Abingdon Downs                     | RR[5]      | 0.49      | 1.35          | 4.00      | 0                 |
| Abington (Qld)                     | RR[6]      | 0.36      | 1.03          | 3.01      | 53                |
| Acacia Ridge                       | RR[7]      | 0.81      | 1.27          | 1.91      | 5949              |
| Acland                             | RR[8]      | 0.28      | 0.76          | 2.20      | 27                |
| Adare                              | RR[9]      | 0.22      | 0.57          | 1.33      | 670               |
| Adavale                            | RR[10]     | 0.43      | 1.16          | 3.16      | 80                |
| Adelaide Park                      | RR[11]     | 0.35      | 0.96          | 2.42      | 334               |
| Advancetown                        | RR[12]     | 0.23      | 0.62          | 1.46      | 380               |
| Aeroglen                           | RR[13]     | 0.73      | 1.88          | 4.65      | 314               |
| Agnes Water                        | RR[14]     | 0.48      | 1.08          | 2.19      | 1801              |
| Airdmillan                         | RR[15]     | 0.33      | 1.06          | 3.17      | 82                |
| Airlie Beach                       | RR[16]     | 0.42      | 0.94          | 1.89      | 1150              |
| Airville                           | RR[17]     | 0.33      | 0.90          | 2.19      | 283               |
| Aitkenvale                         | RR[18]     | 0.60      | 1.03          | 1.73      | 3856              |
| Alabama Hill                       | RR[19]     | 0.51      | 1.54          | 4.23      | 99                |
| Albany Creek                       | RR[20]     | 0.43      | 0.64          | 0.94      | 12566             |
| Alberta                            | RR[21]     | 0.33      | 0.95          | 2.69      | 48                |
| Alberton (Qld)                     | RR[22]     | 0.34      | 0.88          | 2.07      | 485               |
| Albinia                            | RR[23]     | 0.30      | 0.91          | 2.61      | 109               |
| Albion (Brisbane - Qld)            | RR[24]     | 0.94      | 1.68          | 2.89      | 2054              |
| Albion (Richmond - Qld)            | RR[25]     | 0.49      | 1.43          | 4.03      | 13                |
| Alderley                           | RR[26]     | 0.78      | 1.21          | 1.84      | 5008              |
| Aldershot                          | RR[27]     | 0.28      | 0.68          | 1.65      | 1049              |
| Aldoga                             | RR[28]     | 0.33      | 0.92          | 2.95      | 0                 |
| Alexandra (Qld)                    | RR[29]     | 0.35      | 0.92          | 2.53      | 168               |
| Alexandra Headland                 | RR[30]     | 0.19      | 0.40          | 0.85      | 3541              |
| Alexandra Hills                    | RR[31]     | 0.58      | 0.84          | 1.18      | 12995             |
| Algester                           | RR[32]     | 0.35      | 0.62          | 1.02      | 6766              |
| Alice Creek                        | RR[33]     | 0.30      | 0.87          | 2.22      | 48                |
| Alice River                        | RR[34]     | 0.28      | 0.64          | 1.31      | 1811              |
| Allan                              | RR[35]     | 0.25      | 0.75          | 2.33      | 73                |
| Allandale (Qld)                    | RR[36]     | 0.27      | 0.74          | 2.15      | 44                |
| Allenstown                         | RR[37]     | 0.62      | 1.17          | 2.05      | 2313              |
| Allenview                          | RR[38]     | 0.22      | 0.61          | 1.69      | 154               |
| Alligator Creek (Mackay - Qld)     | RR[39]     | 0.37      | 0.95          | 2.04      | 617               |
| Alligator Creek (Townsville - Qld) | RR[40]     | 0.38      | 0.91          | 1.97      | 1064              |
| Allora                             | RR[41]     | 0.73      | 1.57          | 3.07      | 1017              |
| Alloway                            | RR[42]     | 0.30      | 0.82          | 2.10      | 390               |
| Almaden                            | RR[43]     | 0.39      | 1.15          | 3.56      | 58                |
| Aloomba                            | RR[44]     | 0.35      | 0.94          | 2.29      | 408               |
| Alpha                              | RR[45]     | 0.41      | 1.08          | 2.66      | 276               |
| Alsace                             | RR[46]     | 0.34      | 0.93          | 2.92      | 3                 |
| Alton Downs                        | RR[47]     | 0.32      | 0.74          | 1.62      | 1025              |
| Alva                               | RR[48]     | 0.33      | 0.92          | 2.52      | 238               |
| Amamoor                            | RR[49]     | 0.37      | 0.90          | 2.21      | 511               |

|                         |        |             |             |             |       |
|-------------------------|--------|-------------|-------------|-------------|-------|
| Amamoor Creek           | RR[50] | 0.31        | 0.99        | 2.92        | 43    |
| Amaroo (Qld)            | RR[51] | 0.42        | 1.42        | 4.44        | 22    |
| Amber                   | RR[52] | 0.45        | 1.26        | 3.83        | 0     |
| Amberley                | RR[53] | 0.24        | 0.67        | 1.68        | 246   |
| Ambrose                 | RR[54] | 0.29        | 0.89        | 2.34        | 177   |
| Amby                    | RR[55] | 0.32        | 1.05        | 3.21        | 74    |
| Amiens                  | RR[56] | 0.28        | 0.75        | 1.99        | 232   |
| Amity                   | RR[57] | 0.65        | 2.17        | 5.31        | 341   |
| Andergrove              | RR[58] | 0.62        | 0.94        | 1.40        | 7353  |
| Anderleigh              | RR[59] | 0.30        | 0.86        | 2.33        | 80    |
| Andromache              | RR[60] | 0.36        | 1.00        | 2.98        | 48    |
| Anduramba               | RR[61] | 0.30        | 0.81        | 2.46        | 68    |
| Annandale (Qld)         | RR[62] | 0.41        | 0.70        | 1.13        | 6750  |
| Annerley                | RR[63] | 0.79        | 1.14        | 1.58        | 9924  |
| Anstead                 | RR[64] | 0.19        | 0.47        | 1.16        | 1185  |
| Anthony                 | RR[65] | 0.22        | 0.68        | 1.94        | 85    |
| Antigua                 | RR[66] | 0.38        | 1.08        | 2.90        | 120   |
| Apple Tree Creek        | RR[67] | 0.60        | 1.43        | 3.27        | 525   |
| Applethorpe             | RR[68] | 0.26        | 0.73        | 1.94        | 422   |
| Arafura Sea             | RR[69] | 0.19        | 0.76        | 2.99        | 0     |
| Araluen (Qld)           | RR[70] | 0.23        | 0.61        | 1.61        | 511   |
| Aramac                  | RR[71] | 0.81        | 2.12        | 5.63        | 224   |
| Aramara                 | RR[72] | 0.30        | 0.86        | 2.59        | 54    |
| Arana Hills             | RR[73] | 0.49        | 0.83        | 1.30        | 5346  |
| Aranbanga               | RR[74] | 0.30        | 0.90        | 2.52        | 7     |
| Aratula (Qld)           | RR[75] | 0.20        | 0.58        | 1.61        | 413   |
| Arbouin                 | RR[76] | 0.42        | 1.31        | 3.90        | 0     |
| Arcadia (Qld)           | RR[77] | <b>1.48</b> | <b>3.96</b> | <b>9.31</b> | 235   |
| Arcadia Valley          | RR[78] | 0.34        | 0.94        | 2.46        | 81    |
| Archer River            | RR[79] | 0.41        | 1.19        | 3.62        | 22    |
| Archerfield             | RR[80] | 0.50        | 1.29        | 3.03        | 471   |
| Arcturus                | RR[81] | 0.31        | 0.92        | 2.61        | 60    |
| Argoon (Qld)            | RR[82] | 0.30        | 0.85        | 2.35        | 123   |
| Argyll                  | RR[83] | 0.30        | 0.95        | 2.58        | 26    |
| Armstrong Beach         | RR[84] | 0.20        | 0.61        | 1.58        | 686   |
| Armstrong Creek (Qld)   | RR[85] | 0.21        | 0.58        | 1.67        | 270   |
| Aroona                  | RR[86] | 0.19        | 0.46        | 0.92        | 2662  |
| Arriga                  | RR[87] | 0.26        | 0.68        | 1.43        | 1031  |
| Arundel                 | RR[88] | 0.42        | 0.69        | 1.06        | 8464  |
| Ascot (Brisbane - Qld)  | RR[89] | 0.67        | 1.12        | 1.71        | 4871  |
| Ascot (Toowoomba - Qld) | RR[90] | 0.25        | 0.73        | 2.12        | 23    |
| Ashfield (Qld)          | RR[91] | 0.30        | 0.81        | 1.97        | 594   |
| Ashgrove                | RR[92] | 0.73        | 1.02        | 1.42        | 10177 |
| Ashmore                 | RR[93] | 0.97        | 1.35        | 1.81        | 9873  |
| Ashwell                 | RR[94] | 0.25        | 0.71        | 2.04        | 64    |
| Aspley                  | RR[95] | 0.70        | 1.00        | 1.42        | 10077 |
| Atherton                | RR[96] | <b>1.01</b> | <b>1.49</b> | <b>2.14</b> | 6005  |
| Athol                   | RR[97] | 0.23        | 0.69        | 1.92        | 113   |
| Atkinsons Dam           | RR[98] | 0.60        | 1.58        | 4.01        | 178   |
| Aubigny                 | RR[99] | 0.24        | 0.69        | 1.85        | 203   |

|                    |         |             |             |             |      |
|--------------------|---------|-------------|-------------|-------------|------|
| Auburn (Qld)       | RR[100] | 0.29        | 0.91        | 2.78        | 23   |
| Auchenflower       | RR[101] | 0.30        | 0.59        | 0.99        | 5106 |
| Augathella         | RR[102] | 0.62        | 1.67        | 4.04        | 360  |
| Augustine Heights  | RR[103] | 0.12        | 0.28        | 0.60        | 3419 |
| Aurukun            | RR[104] | 0.54        | 1.25        | 2.77        | 896  |
| Austinville        | RR[105] | 0.23        | 0.64        | 1.61        | 290  |
| Avenell Heights    | RR[106] | 0.56        | 1.00        | 1.61        | 4081 |
| Avoca (Qld)        | RR[107] | 0.42        | 0.76        | 1.42        | 4002 |
| Avoca Vale         | RR[108] | 0.30        | 0.85        | 2.46        | 28   |
| Avondale (Qld)     | RR[109] | 0.25        | 0.62        | 1.57        | 547  |
| Ayr                | RR[110] | <b>1.45</b> | <b>1.99</b> | <b>2.65</b> | 7203 |
| Babinda (Qld)      | RR[111] | 0.95        | 1.93        | 3.69        | 1031 |
| Back Plains        | RR[112] | 0.27        | 0.78        | 2.30        | 63   |
| Badu Island        | RR[113] | 0.51        | 1.41        | 3.43        | 526  |
| Baffle Creek       | RR[114] | 0.28        | 0.79        | 2.21        | 145  |
| Baffle West        | RR[115] | 0.36        | 1.12        | 3.38        | 10   |
| Bahrs Scrub        | RR[116] | 0.17        | 0.41        | 0.93        | 1450 |
| Bajool             | RR[117] | 0.63        | 1.55        | 3.84        | 334  |
| Bakers Bend        | RR[118] | 0.39        | 1.16        | 3.51        | 23   |
| Bakers Creek (Qld) | RR[119] | 0.21        | 0.61        | 1.41        | 925  |
| Baking Board       | RR[120] | 0.29        | 0.82        | 2.36        | 74   |
| Balberra           | RR[121] | 0.34        | 0.88        | 2.14        | 366  |
| Balcomba           | RR[122] | 0.36        | 0.98        | 2.65        | 9    |
| Bald Hills (Qld)   | RR[123] | 0.42        | 0.74        | 1.21        | 5165 |
| Bald Knob          | RR[124] | 0.28        | 0.79        | 2.16        | 231  |
| Balgol Beach       | RR[125] | 0.44        | 1.21        | 2.80        | 816  |
| Balgowan (Qld)     | RR[126] | 0.24        | 0.75        | 2.40        | 11   |
| Ball Bay           | RR[127] | 0.25        | 0.71        | 2.06        | 319  |
| Ballandean         | RR[128] | 0.38        | 1.06        | 2.80        | 281  |
| Ballard            | RR[129] | 0.41        | 1.10        | 2.92        | 125  |
| Ballaroo           | RR[130] | 0.32        | 0.94        | 2.64        | 34   |
| Ballogie           | RR[131] | 0.49        | 1.25        | 3.09        | 246  |
| Balmoral (Qld)     | RR[132] | 0.70        | 1.23        | 2.06        | 3127 |
| Balmoral Ridge     | RR[133] | 0.24        | 0.64        | 1.66        | 246  |
| Balnagowan         | RR[134] | 0.24        | 0.66        | 1.85        | 293  |
| Bamaga             | RR[135] | 0.23        | 0.71        | 1.87        | 767  |
| Bambaroo           | RR[136] | 0.34        | 1.03        | 2.93        | 108  |
| Bamboo             | RR[137] | 0.42        | 1.25        | 3.67        | 104  |
| Bamboo Creek       | RR[138] | 0.45        | 1.24        | 3.28        | 75   |
| Ban Ban            | RR[139] | 0.30        | 0.85        | 2.61        | 20   |
| Ban Ban Springs    | RR[140] | 0.21        | 0.88        | 3.68        | 4    |
| Banana             | RR[141] | 0.29        | 0.81        | 2.18        | 275  |
| Bancroft           | RR[142] | 0.26        | 0.79        | 2.28        | 74   |
| Bangalee (Qld)     | RR[143] | 0.19        | 0.77        | 2.65        | 148  |
| Bangall            | RR[144] | 0.47        | 1.46        | 4.15        | 4    |
| Banks Creek        | RR[145] | 0.26        | 0.78        | 2.39        | 5    |
| Banks Pocket       | RR[146] | 0.23        | 0.71        | 1.95        | 126  |
| Banksia Beach      | RR[147] | 0.42        | 0.75        | 1.26        | 5141 |
| Bannockburn (Qld)  | RR[148] | 0.24        | 0.64        | 1.60        | 591  |
| Banyo              | RR[149] | 1.00        | 1.49        | 2.23        | 4780 |

|                    |         |      |      |      |      |
|--------------------|---------|------|------|------|------|
| Bapaume            | RR[150] | 0.26 | 0.82 | 2.36 | 94   |
| Barakula           | RR[151] | 0.30 | 0.90 | 2.72 | 10   |
| Baralaba           | RR[152] | 0.49 | 1.26 | 3.39 | 283  |
| Barambah           | RR[153] | 0.28 | 0.84 | 2.28 | 36   |
| Barcaldine         | RR[154] | 0.51 | 1.12 | 2.27 | 1129 |
| Barcaldine Downs   | RR[155] | 0.45 | 1.26 | 3.79 | 14   |
| Bardon             | RR[156] | 0.49 | 0.80 | 1.24 | 7370 |
| Baree              | RR[157] | 0.49 | 1.37 | 3.97 | 143  |
| Barellan Point     | RR[158] | 0.38 | 0.92 | 2.04 | 939  |
| Bargara            | RR[159] | 0.78 | 1.22 | 1.81 | 6328 |
| Bargunyah          | RR[160] | 0.32 | 1.01 | 3.03 | 22   |
| Barker Creek Flat  | RR[161] | 0.30 | 0.91 | 2.54 | 43   |
| Barkly (Qld)       | RR[162] | 0.53 | 1.59 | 4.57 | 28   |
| Barlil             | RR[163] | 0.27 | 0.82 | 2.20 | 30   |
| Barlows Hill       | RR[164] | 0.51 | 1.25 | 2.77 | 649  |
| Barlyne            | RR[165] | 0.30 | 0.91 | 2.89 | 3    |
| Barmaryee          | RR[166] | 0.33 | 0.86 | 1.92 | 672  |
| Barmoya            | RR[167] | 0.44 | 1.26 | 3.51 | 57   |
| Barnard            | RR[168] | 0.30 | 0.95 | 2.57 | 25   |
| Barney Point       | RR[169] | 0.41 | 1.01 | 2.19 | 927  |
| Barney View        | RR[170] | 0.24 | 0.78 | 2.24 | 53   |
| Baroondah          | RR[171] | 0.34 | 0.99 | 2.85 | 1    |
| Barramornie        | RR[172] | 0.29 | 0.95 | 2.72 | 15   |
| Barratta (Qld)     | RR[173] | 0.37 | 1.05 | 2.84 | 54   |
| Barrine            | RR[174] | 0.43 | 1.16 | 3.17 | 211  |
| Barringha          | RR[175] | 0.33 | 1.01 | 2.99 | 50   |
| Barringun          | RR[176] | 0.33 | 1.15 | 3.80 | 7    |
| Barron             | RR[177] | 0.41 | 1.14 | 3.36 | 36   |
| Barron Gorge       | RR[178] | 0.42 | 1.09 | 3.21 | 0    |
| Bartle Frere       | RR[179] | 0.39 | 1.09 | 3.02 | 115  |
| Barwidgi           | RR[180] | 0.41 | 1.23 | 3.72 | 0    |
| Basalt (Qld)       | RR[181] | 0.40 | 1.06 | 2.81 | 160  |
| Basilisk           | RR[182] | 0.41 | 1.27 | 3.71 | 0    |
| Basin Pocket       | RR[183] | 0.45 | 1.02 | 2.26 | 730  |
| Battery Hill       | RR[184] | 0.56 | 1.08 | 2.06 | 2083 |
| Bauhinia           | RR[185] | 0.33 | 0.95 | 2.77 | 36   |
| Bauple             | RR[186] | 0.62 | 1.51 | 3.46 | 567  |
| Bauple Forest      | RR[187] | 0.34 | 0.93 | 2.67 | 7    |
| Bayrick            | RR[188] | 0.37 | 1.18 | 3.41 | 9    |
| Bayview Heights    | RR[189] | 0.52 | 0.94 | 1.56 | 3384 |
| Beach Holm         | RR[190] | 0.28 | 0.80 | 2.39 | 32   |
| Beachmere          | RR[191] | 0.58 | 1.06 | 1.77 | 3455 |
| Beaconsfield (Qld) | RR[192] | 0.48 | 0.85 | 1.38 | 4303 |
| Beatrice           | RR[193] | 0.37 | 1.09 | 3.02 | 79   |
| Beaudesert         | RR[194] | 0.88 | 1.34 | 2.05 | 5132 |
| Beaufort (Qld)     | RR[195] | 0.34 | 1.00 | 2.82 | 39   |
| Beaver Rock        | RR[196] | 0.29 | 0.90 | 2.81 | 46   |
| Bedourie           | RR[197] | 0.43 | 1.33 | 3.76 | 88   |
| Beebo              | RR[198] | 0.29 | 0.92 | 2.81 | 67   |
| Beecher            | RR[199] | 0.41 | 1.04 | 2.45 | 670  |

|                 |         |             |             |             |      |
|-----------------|---------|-------------|-------------|-------------|------|
| Beechmont       | RR[200] | 0.27        | 0.67        | 1.48        | 704  |
| Beelbee         | RR[201] | 0.26        | 0.81        | 2.61        | 14   |
| Beelbi Creek    | RR[202] | 0.40        | 1.22        | 3.29        | 111  |
| Beenaam Valley  | RR[203] | 0.26        | 0.78        | 2.40        | 46   |
| Beenleigh       | RR[204] | 0.92        | 1.38        | 1.96        | 6670 |
| Beerburrum      | RR[205] | 0.33        | 0.89        | 2.13        | 622  |
| Beeron          | RR[206] | 0.31        | 0.89        | 2.62        | 11   |
| Beerwah         | RR[207] | 0.41        | 0.71        | 1.18        | 5382 |
| Begonia         | RR[208] | 0.30        | 0.96        | 2.89        | 33   |
| Beilba          | RR[209] | 0.37        | 1.06        | 2.85        | 46   |
| Belcong         | RR[210] | 0.28        | 0.79        | 2.37        | 35   |
| Belgian Gardens | RR[211] | 0.50        | 1.05        | 1.93        | 1693 |
| Belivah         | RR[212] | 0.21        | 0.58        | 1.61        | 273  |
| Bell (Qld)      | RR[213] | 0.38        | 1.02        | 2.56        | 405  |
| Bella Creek     | RR[214] | 0.35        | 1.12        | 3.55        | 40   |
| Bellara         | RR[215] | <b>2.07</b> | <b>3.15</b> | <b>4.58</b> | 2869 |
| Bellbird Park   | RR[216] | 0.58        | 0.98        | 1.52        | 5106 |
| Bellbowrie      | RR[217] | 0.25        | 0.51        | 0.99        | 4327 |
| Bellenden Ker   | RR[218] | 0.36        | 1.06        | 2.82        | 204  |
| Bellevue (Qld)  | RR[219] | 0.43        | 1.30        | 3.66        | 0    |
| Bellfield (Qld) | RR[220] | 0.45        | 1.42        | 4.66        | 0    |
| Belli Park      | RR[221] | 0.23        | 0.63        | 1.55        | 555  |
| Bellmere        | RR[222] | 0.36        | 0.68        | 1.19        | 4386 |
| Bells Bridge    | RR[223] | 0.26        | 0.72        | 2.01        | 166  |
| Bells Creek     | RR[224] | 0.26        | 0.70        | 1.97        | 85   |
| Bellthorpe      | RR[225] | 0.27        | 0.72        | 1.88        | 115  |
| Belmont (Qld)   | RR[226] | 0.35        | 0.66        | 1.19        | 3482 |
| Belmunda        | RR[227] | 0.22        | 0.88        | 3.15        | 7    |
| Belvedere       | RR[228] | 0.57        | 1.42        | 2.95        | 699  |
| Belyando        | RR[229] | 0.37        | 0.99        | 2.71        | 50   |
| Bemerside       | RR[230] | 0.58        | 1.52        | 4.07        | 190  |
| Benair          | RR[231] | 0.29        | 0.83        | 2.38        | 116  |
| Benaraby        | RR[232] | 0.47        | 1.05        | 2.26        | 911  |
| Benarkin        | RR[233] | 0.27        | 0.81        | 2.54        | 51   |
| Benarkin North  | RR[234] | 0.34        | 0.92        | 2.40        | 273  |
| Benholme        | RR[235] | 0.27        | 0.81        | 2.43        | 76   |
| Benobble        | RR[236] | 0.26        | 0.75        | 2.26        | 32   |
| Benowa          | RR[237] | 0.76        | 1.18        | 1.73        | 7088 |
| Bentley Park    | RR[238] | 0.32        | 0.59        | 0.94        | 5788 |
| Berajondo       | RR[239] | 0.26        | 0.82        | 2.37        | 54   |
| Berat           | RR[240] | 0.24        | 0.76        | 2.18        | 87   |
| Bergen          | RR[241] | 0.29        | 0.79        | 2.13        | 54   |
| Berrinba        | RR[242] | 0.18        | 0.46        | 1.06        | 982  |
| Berserker       | RR[243] | 0.78        | 1.21        | 1.83        | 5554 |
| Bethania        | RR[244] | 0.64        | 1.06        | 1.70        | 4543 |
| Biarra          | RR[245] | 0.28        | 0.78        | 2.10        | 199  |
| Biboohra        | RR[246] | 0.42        | 1.06        | 2.58        | 469  |
| Biddaddaba      | RR[247] | 0.35        | 0.94        | 2.57        | 152  |
| Biddeston       | RR[248] | 0.23        | 0.66        | 1.75        | 228  |
| Bidwill (Qld)   | RR[249] | 0.27        | 0.71        | 1.96        | 396  |

|                           |         |      |      |      |       |
|---------------------------|---------|------|------|------|-------|
| Biggenden                 | RR[250] | 0.84 | 1.81 | 3.67 | 714   |
| Biggera Waters            | RR[251] | 0.63 | 0.97 | 1.44 | 7397  |
| Bilinga                   | RR[252] | 0.25 | 0.64 | 1.45 | 1615  |
| Billa Billa               | RR[253] | 0.29 | 0.84 | 2.76 | 74    |
| Biloela                   | RR[254] | 0.57 | 0.99 | 1.61 | 4410  |
| Bilyana                   | RR[255] | 0.32 | 0.99 | 2.91 | 164   |
| Bindebango                | RR[256] | 0.37 | 1.05 | 2.70 | 10    |
| Bingegang                 | RR[257] | 0.31 | 0.90 | 2.96 | 18    |
| Bingil Bay                | RR[258] | 0.54 | 1.44 | 3.52 | 347   |
| Binjour                   | RR[259] | 0.51 | 1.47 | 4.21 | 77    |
| Binna Burra (Qld)         | RR[260] | 0.24 | 0.73 | 2.33 | 4     |
| Birdsville                | RR[261] | 0.50 | 1.48 | 4.06 | 121   |
| Birkalla                  | RR[262] | 0.40 | 1.08 | 3.36 | 108   |
| Birkdale                  | RR[263] | 0.56 | 0.83 | 1.16 | 11769 |
| Birnam (Scenic Rim - Qld) | RR[264] | 0.24 | 0.67 | 1.98 | 88    |
| Birnam (Toowoomba - Qld)  | RR[265] | 0.21 | 0.68 | 1.98 | 53    |
| Birtinya                  | RR[266] | 0.34 | 0.73 | 1.52 | 1578  |
| Black Duck Creek          | RR[267] | 0.22 | 0.69 | 2.17 | 18    |
| Black Jack                | RR[268] | 0.37 | 1.06 | 2.99 | 125   |
| Black Mountain (Qld)      | RR[269] | 0.39 | 0.88 | 1.78 | 1213  |
| Black River (Qld)         | RR[270] | 0.31 | 0.76 | 1.66 | 1192  |
| Black Snake               | RR[271] | 0.28 | 0.82 | 2.32 | 65    |
| Blackall                  | RR[272] | 0.77 | 1.57 | 3.07 | 1176  |
| Blackbull                 | RR[273] | 0.49 | 1.54 | 4.84 | 3     |
| Blackbutt (Qld)           | RR[274] | 0.52 | 1.27 | 2.86 | 713   |
| Blackbutt North           | RR[275] | 0.25 | 0.71 | 2.09 | 351   |
| Blackbutt South           | RR[276] | 0.25 | 0.80 | 2.33 | 146   |
| Blackdown                 | RR[277] | 0.29 | 0.96 | 3.01 | 0     |
| Blackrock                 | RR[278] | 0.69 | 1.74 | 4.15 | 264   |
| Blacks Beach              | RR[279] | 0.18 | 0.41 | 0.83 | 2826  |
| Blacksoil                 | RR[280] | 0.34 | 1.01 | 2.87 | 98    |
| Blackstone                | RR[281] | 0.56 | 1.21 | 2.77 | 837   |
| Blackswamp                | RR[282] | 0.30 | 0.86 | 2.64 | 47    |
| Blackwater                | RR[283] | 0.53 | 0.94 | 1.58 | 3536  |
| Blairmore                 | RR[284] | 0.28 | 0.90 | 2.89 | 0     |
| Blanchview                | RR[285] | 0.23 | 0.67 | 1.75 | 158   |
| Blantyre                  | RR[286] | 0.20 | 0.66 | 2.01 | 49    |
| Blaxland (Qld)            | RR[287] | 0.24 | 0.76 | 2.41 | 24    |
| Blenheim                  | RR[288] | 0.28 | 0.77 | 2.04 | 240   |
| Bli Bli                   | RR[289] | 0.36 | 0.63 | 1.00 | 6255  |
| Bloomfield                | RR[290] | 0.58 | 1.60 | 4.17 | 178   |
| Bloomsbury                | RR[291] | 0.53 | 1.39 | 3.20 | 477   |
| Blue Mountain             | RR[292] | 0.27 | 0.80 | 2.21 | 72    |
| Blue Mountain Heights     | RR[293] | 0.28 | 0.78 | 1.82 | 753   |
| Bluewater                 | RR[294] | 0.36 | 0.90 | 2.16 | 826   |
| Bluewater Park            | RR[295] | 0.30 | 0.80 | 1.83 | 751   |
| Bluff                     | RR[296] | 0.48 | 1.20 | 2.92 | 317   |
| Blythdale                 | RR[297] | 0.33 | 1.00 | 2.84 | 33    |
| Boatman                   | RR[298] | 0.37 | 1.09 | 2.98 | 6     |
| Bogandilla                | RR[299] | 0.30 | 0.95 | 2.90 | 24    |

|                   |         |             |             |             |      |
|-------------------|---------|-------------|-------------|-------------|------|
| Bogie             | RR[300] | 0.36        | 0.99        | 2.40        | 141  |
| Bohle             | RR[301] | 0.60        | 1.81        | 4.92        | 76   |
| Bohle Plains      | RR[302] | 0.22        | 0.48        | 1.04        | 2288 |
| Boigu Island      | RR[303] | 0.32        | 1.18        | 3.63        | 174  |
| Bokarina          | RR[304] | 0.28        | 0.77        | 1.70        | 1038 |
| Bollier           | RR[305] | 0.28        | 0.75        | 2.01        | 172  |
| Bollon            | RR[306] | 0.32        | 0.89        | 2.54        | 168  |
| Bolwarra (Qld)    | RR[307] | 0.44        | 1.32        | 4.19        | 0    |
| Bombeeta          | RR[308] | 0.37        | 1.08        | 3.11        | 112  |
| Bon Accord        | RR[309] | 0.31        | 0.92        | 2.56        | 15   |
| Bondoola          | RR[310] | 0.30        | 0.78        | 1.86        | 432  |
| Bongaree          | RR[311] | <b>1.80</b> | <b>2.46</b> | <b>3.29</b> | 6400 |
| Bongeen           | RR[312] | 0.26        | 0.76        | 2.11        | 50   |
| Bonnie Doon (Qld) | RR[313] | 0.51        | 1.33        | 3.18        | 268  |
| Bonogin           | RR[314] | 0.26        | 0.53        | 1.00        | 3510 |
| Bonshaw (Qld)     | RR[315] | 0.28        | 0.92        | 3.13        | 28   |
| Bony Mountain     | RR[316] | 0.31        | 0.81        | 2.21        | 78   |
| Boodua            | RR[317] | 0.24        | 0.72        | 2.07        | 75   |
| Boogan            | RR[318] | 0.56        | 1.58        | 4.03        | 91   |
| Booie             | RR[319] | 0.31        | 0.75        | 1.80        | 814  |
| Boolboonda        | RR[320] | 0.26        | 0.81        | 2.75        | 52   |
| Boolburra         | RR[321] | 0.29        | 0.99        | 3.06        | 24   |
| Boompa            | RR[322] | 0.29        | 0.88        | 2.44        | 68   |
| Boonah (Qld)      | RR[323] | <b>1.39</b> | <b>2.37</b> | <b>3.73</b> | 2058 |
| Boonara           | RR[324] | 0.30        | 0.82        | 2.47        | 54   |
| Boonarga          | RR[325] | 0.28        | 0.84        | 2.38        | 28   |
| Boondall          | RR[326] | <b>1.02</b> | <b>1.46</b> | <b>2.01</b> | 7576 |
| Boondandilla      | RR[327] | 0.29        | 0.91        | 2.60        | 0    |
| Boondooma         | RR[328] | 0.33        | 0.86        | 2.34        | 63   |
| Boonooroo         | RR[329] | 0.25        | 0.77        | 2.10        | 303  |
| Boonooroo Plains  | RR[330] | 0.40        | 1.21        | 3.80        | 3    |
| Booral (Qld)      | RR[331] | 0.37        | 0.88        | 1.83        | 1254 |
| Booroobin         | RR[332] | 0.22        | 0.68        | 1.76        | 220  |
| Boobyjan          | RR[333] | 0.33        | 0.85        | 2.16        | 82   |
| Booval            | RR[334] | <b>1.56</b> | <b>2.53</b> | <b>3.88</b> | 2214 |
| Booyal            | RR[335] | 0.32        | 0.85        | 2.32        | 210  |
| Borallon          | RR[336] | 0.47        | 1.26        | 3.64        | 64   |
| Boreen Point      | RR[337] | 0.32        | 0.88        | 2.40        | 300  |
| Boronia Heights   | RR[338] | 0.47        | 0.76        | 1.24        | 5968 |
| Bororen           | RR[339] | 0.26        | 0.71        | 1.78        | 324  |
| Boulder Creek     | RR[340] | 0.34        | 1.11        | 3.11        | 12   |
| Bouldercombe      | RR[341] | 0.46        | 1.03        | 2.15        | 866  |
| Boulia            | RR[342] | 0.65        | 1.96        | 5.57        | 249  |
| Bountiful Islands | RR[343] | 0.21        | 1.23        | 7.36        | 0    |
| Bowen             | RR[344] | <b>1.24</b> | <b>1.72</b> | <b>2.28</b> | 8442 |
| Bowen Hills       | RR[345] | 0.27        | 0.57        | 1.14        | 3108 |
| Bowenville        | RR[346] | 0.34        | 0.89        | 2.51        | 201  |
| Boyland           | RR[347] | 0.28        | 0.74        | 1.78        | 627  |
| Boyne Island      | RR[348] | 0.32        | 0.63        | 1.19        | 3588 |
| Boyne Valley      | RR[349] | 0.25        | 0.71        | 1.88        | 281  |



|                     |         |      |      |      |       |
|---------------------|---------|------|------|------|-------|
| Boynedale           | RR[350] | 0.24 | 0.78 | 2.30 | 17    |
| Boyneside           | RR[351] | 0.31 | 0.84 | 2.50 | 46    |
| Boynewood           | RR[352] | 0.28 | 0.86 | 2.50 | 150   |
| Bracalba            | RR[353] | 0.25 | 0.74 | 2.04 | 94    |
| Bracewell           | RR[354] | 0.32 | 0.83 | 2.39 | 151   |
| Bracken Ridge       | RR[355] | 0.65 | 0.93 | 1.27 | 13493 |
| Braemeadows         | RR[356] | 0.40 | 1.18 | 3.05 | 250   |
| Braemore            | RR[357] | 0.28 | 0.80 | 2.19 | 117   |
| Bramston Beach      | RR[358] | 0.30 | 1.01 | 3.13 | 158   |
| Branch Creek        | RR[359] | 0.31 | 0.87 | 2.79 | 32    |
| Branchview          | RR[360] | 0.26 | 0.75 | 2.29 | 14    |
| Brandon             | RR[361] | 0.26 | 0.69 | 1.64 | 892   |
| Brandy Creek (Qld)  | RR[362] | 0.26 | 0.82 | 2.71 | 96    |
| Branyan             | RR[363] | 0.75 | 1.31 | 2.15 | 3191  |
| Brassall            | RR[364] | 0.69 | 1.06 | 1.55 | 8381  |
| Bray Park (Qld)     | RR[365] | 0.30 | 0.53 | 0.86 | 7991  |
| Breadalbane (Qld)   | RR[366] | 0.32 | 0.99 | 2.92 | 20    |
| Breakaway           | RR[367] | 0.43 | 1.31 | 3.85 | 165   |
| Breddan             | RR[368] | 0.33 | 0.87 | 2.19 | 378   |
| Brendale            | RR[369] | 0.24 | 0.53 | 1.07 | 2177  |
| Bribie Island North | RR[370] | 0.23 | 1.34 | 6.22 | 0     |
| Bridgeman Downs     | RR[371] | 0.19 | 0.37 | 0.66 | 6837  |
| Bridges             | RR[372] | 0.31 | 0.90 | 2.38 | 234   |
| Brigalow            | RR[373] | 0.30 | 0.79 | 2.23 | 138   |
| Brightly            | RR[374] | 0.27 | 0.78 | 2.03 | 59    |
| Brighton (Qld)      | RR[375] | 0.79 | 1.19 | 1.70 | 7594  |
| Brightview          | RR[376] | 0.23 | 0.59 | 1.38 | 653   |
| Brigooda            | RR[377] | 0.29 | 0.93 | 2.79 | 27    |
| Bringalily          | RR[378] | 0.28 | 0.83 | 2.44 | 60    |
| Brinsmead           | RR[379] | 0.49 | 0.88 | 1.46 | 4157  |
| Brisbane Airport    | RR[380] | 0.41 | 1.20 | 3.66 | 0     |
| Brisbane City       | RR[381] | 0.31 | 0.53 | 0.86 | 9012  |
| Broadbeach          | RR[382] | 0.63 | 1.07 | 1.64 | 5093  |
| Broadbeach Waters   | RR[383] | 0.71 | 1.10 | 1.60 | 6509  |
| Broadmere           | RR[384] | 0.32 | 0.97 | 2.90 | 41    |
| Broadwater (Qld)    | RR[385] | 0.29 | 0.81 | 2.05 | 223   |
| Broken River        | RR[386] | 0.29 | 0.87 | 2.72 | 19    |
| Bromelton           | RR[387] | 0.25 | 0.68 | 1.83 | 126   |
| Brookfield (Qld)    | RR[388] | 0.34 | 0.69 | 1.29 | 2876  |
| Brookhill           | RR[389] | 0.49 | 1.30 | 3.56 | 64    |
| Brooklands          | RR[390] | 0.38 | 0.97 | 2.45 | 244   |
| Brookstead          | RR[391] | 0.26 | 0.74 | 1.84 | 165   |
| Brookwater          | RR[392] | 0.22 | 0.51 | 1.07 | 1625  |
| Brooloo             | RR[393] | 0.32 | 0.92 | 2.31 | 293   |
| Brooweena           | RR[394] | 0.31 | 0.89 | 2.44 | 88    |
| Broughton (Qld)     | RR[395] | 0.31 | 0.81 | 1.88 | 551   |
| Brovinia            | RR[396] | 0.32 | 0.91 | 2.67 | 7     |
| Browns Plains (Qld) | RR[397] | 0.19 | 0.40 | 0.76 | 4905  |
| Broxburn            | RR[398] | 0.25 | 0.72 | 2.05 | 123   |
| Brush Creek         | RR[399] | 0.32 | 0.94 | 2.84 | 37    |

|                   |         |             |              |              |       |
|-------------------|---------|-------------|--------------|--------------|-------|
| Bryden            | RR[400] | 0.28        | 0.76         | 2.28         | 33    |
| Brymaroo          | RR[401] | 0.28        | 0.74         | 2.10         | 103   |
| Buaraba           | RR[402] | 0.27        | 0.77         | 2.04         | 156   |
| Buaraba South     | RR[403] | 0.25        | 0.78         | 2.20         | 0     |
| Bucasia           | RR[404] | 0.37        | 0.72         | 1.25         | 3495  |
| Bucca (Qld)       | RR[405] | 0.29        | 0.72         | 1.65         | 865   |
| Buccan            | RR[406] | 0.28        | 0.69         | 1.46         | 1481  |
| Buckingham (Qld)  | RR[407] | 0.48        | 1.52         | 4.58         | 0     |
| Buckland (Qld)    | RR[408] | 0.38        | 1.02         | 3.03         | 37    |
| Buddina           | RR[409] | 0.58        | 1.07         | 1.85         | 3158  |
| Buderim           | RR[410] | 0.65        | 0.85         | 1.09         | 24204 |
| Budgee            | RR[411] | 0.22        | 0.69         | 1.91         | 32    |
| Bukali            | RR[412] | 0.26        | 0.81         | 2.58         | 51    |
| Bulgun            | RR[413] | 0.38        | 1.04         | 2.80         | 226   |
| Bulimba           | RR[414] | 0.80        | 1.26         | 1.90         | 5586  |
| Bullawarra        | RR[415] | 0.39        | 1.14         | 3.84         | 5     |
| Bullcamp          | RR[416] | 0.28        | 0.85         | 2.52         | 49    |
| Bulleringa        | RR[417] | 0.43        | 1.26         | 4.25         | 0     |
| Bulli Creek       | RR[418] | 0.30        | 0.87         | 2.53         | 6     |
| Bulloo Downs      | RR[419] | 0.37        | 1.18         | 3.40         | 0     |
| Bullyard          | RR[420] | 0.44        | 1.25         | 3.16         | 158   |
| Bulwer            | RR[421] | 0.00        | 0.00         | 0.00         | 49    |
| Bunburra          | RR[422] | 0.23        | 0.68         | 1.98         | 86    |
| Bundaberg Central | RR[423] | <b>5.84</b> | <b>11.07</b> | <b>19.47</b> | 294   |
| Bundaberg East    | RR[424] | 0.55        | 1.09         | 2.02         | 2223  |
| Bundaberg North   | RR[425] | 0.68        | 1.15         | 1.80         | 4602  |
| Bundaberg South   | RR[426] | 0.54        | 1.05         | 1.84         | 2774  |
| Bundaberg West    | RR[427] | 0.87        | 1.59         | 2.72         | 2117  |
| Bundall           | RR[428] | 0.46        | 0.82         | 1.48         | 3716  |
| Bundamba          | RR[429] | 0.62        | 1.03         | 1.60         | 5247  |
| Bundi             | RR[430] | 0.33        | 0.96         | 2.73         | 35    |
| Bundoora (Qld)    | RR[431] | 0.26        | 0.80         | 2.52         | 9     |
| Bungaban          | RR[432] | 0.33        | 0.91         | 2.60         | 40    |
| Bungadoo          | RR[433] | 0.28        | 0.77         | 1.97         | 280   |
| Bungalow          | RR[434] | 0.68        | 1.31         | 2.35         | 1908  |
| Bungeworgorai     | RR[435] | 0.36        | 0.99         | 2.77         | 52    |
| Bungil (Qld)      | RR[436] | 0.35        | 0.98         | 3.01         | 24    |
| Bungundarra       | RR[437] | 0.34        | 0.91         | 2.30         | 437   |
| Bungunya          | RR[438] | 0.29        | 0.88         | 2.60         | 49    |
| Bunjurgen         | RR[439] | 0.26        | 0.68         | 2.00         | 99    |
| Bunya             | RR[440] | 0.22        | 0.53         | 1.12         | 1525  |
| Bunya Creek       | RR[441] | 0.29        | 0.78         | 2.31         | 62    |
| Bunya Mountains   | RR[442] | 0.28        | 0.78         | 2.19         | 123   |
| Burbank           | RR[443] | 0.20        | 0.50         | 1.16         | 855   |
| Burdell           | RR[444] | 0.26        | 0.50         | 0.94         | 4235  |
| Burgowan          | RR[445] | 0.33        | 0.94         | 2.78         | 29    |
| Burketown         | RR[446] | 0.51        | 1.63         | 4.55         | 196   |
| Burleigh          | RR[447] | 0.45        | 1.37         | 4.44         | 44    |
| Burleigh Heads    | RR[448] | 0.94        | 1.34         | 1.88         | 8672  |
| Burleigh Waters   | RR[449] | 0.94        | 1.28         | 1.69         | 11555 |

|                  |         |             |             |             |       |
|------------------|---------|-------------|-------------|-------------|-------|
| Burncluith       | RR[450] | 0.28        | 0.85        | 2.37        | 122   |
| Burnett Creek    | RR[451] | 0.23        | 0.71        | 2.00        | 11    |
| Burnett Heads    | RR[452] | 0.63        | 1.24        | 2.22        | 2256  |
| Burnside (Qld)   | RR[453] | 0.30        | 0.71        | 1.43        | 1857  |
| Burpengary       | RR[454] | 0.43        | 0.67        | 1.00        | 11135 |
| Burpengary East  | RR[455] | 0.17        | 0.36        | 0.68        | 5371  |
| Burra Burri      | RR[456] | 0.31        | 0.89        | 2.64        | 36    |
| Burrar Islet     | RR[457] | 0.31        | 1.35        | 5.08        | 0     |
| Burrum Heads     | RR[458] | 0.39        | 0.86        | 1.72        | 1884  |
| Burrum River     | RR[459] | 0.33        | 0.88        | 2.37        | 215   |
| Burrum Town      | RR[460] | 0.33        | 0.93        | 2.69        | 147   |
| Burton (Qld)     | RR[461] | 0.30        | 0.85        | 2.43        | 29    |
| Burua            | RR[462] | 0.22        | 0.55        | 1.37        | 583   |
| Bushland Beach   | RR[463] | 0.17        | 0.38        | 0.72        | 4536  |
| Bushley          | RR[464] | 0.44        | 1.43        | 4.28        | 27    |
| Butchers Creek   | RR[465] | 0.39        | 1.08        | 3.12        | 86    |
| Buxton (Qld)     | RR[466] | 0.40        | 1.02        | 2.44        | 409   |
| Bybera           | RR[467] | 0.29        | 0.92        | 2.86        | 3     |
| Byee             | RR[468] | 0.25        | 0.87        | 2.51        | 21    |
| Byellee          | RR[469] | 0.26        | 0.78        | 2.30        | 0     |
| Byfield          | RR[470] | 0.36        | 1.03        | 3.10        | 238   |
| Bymount          | RR[471] | 0.35        | 1.05        | 3.22        | 29    |
| Byrnestown       | RR[472] | 0.41        | 1.31        | 3.96        | 27    |
| Cabarlah         | RR[473] | 0.18        | 0.50        | 1.13        | 830   |
| Caboolture       | RR[474] | 0.64        | 0.85        | 1.12        | 20780 |
| Caboolture South | RR[475] | 0.49        | 0.83        | 1.39        | 4182  |
| Caboonbah        | RR[476] | 0.28        | 0.86        | 2.71        | 14    |
| Cadarga          | RR[477] | 0.29        | 0.91        | 2.99        | 13    |
| Caffey           | RR[478] | 0.23        | 0.66        | 2.01        | 55    |
| Cainbable        | RR[479] | 0.23        | 0.73        | 2.34        | 64    |
| Cairdbeign       | RR[480] | 0.30        | 0.93        | 2.61        | 66    |
| Cairns City      | RR[481] | <b>2.82</b> | <b>3.96</b> | <b>5.57</b> | 2588  |
| Cairns North     | RR[482] | 0.37        | 0.68        | 1.21        | 4594  |
| Calamvale        | RR[483] | 0.25        | 0.42        | 0.66        | 13620 |
| Calavos          | RR[484] | 0.30        | 0.93        | 2.26        | 279   |
| Calcium          | RR[485] | 0.36        | 1.05        | 3.08        | 18    |
| Caldervale       | RR[486] | 0.41        | 1.10        | 3.08        | 8     |
| Calen            | RR[487] | 0.62        | 1.50        | 3.83        | 310   |
| Calgoa           | RR[488] | 0.31        | 0.89        | 2.73        | 9     |
| Calico Creek     | RR[489] | 0.24        | 0.72        | 1.99        | 128   |
| Calingunee       | RR[490] | 0.29        | 0.90        | 2.85        | 19    |
| Callandoon       | RR[491] | 0.28        | 0.91        | 2.79        | 25    |
| Callemondah      | RR[492] | 0.28        | 0.84        | 2.46        | 18    |
| Callide          | RR[493] | 0.27        | 0.84        | 2.57        | 66    |
| Calliope (Qld)   | RR[494] | 0.27        | 0.54        | 0.99        | 3644  |
| Caloundra        | RR[495] | <b>1.96</b> | <b>2.83</b> | <b>4.00</b> | 3568  |
| Caloundra West   | RR[496] | 0.24        | 0.48        | 0.85        | 4796  |
| Calvert (Qld)    | RR[497] | 0.27        | 0.82        | 2.00        | 260   |
| Camboon (Qld)    | RR[498] | 0.31        | 0.90        | 2.41        | 69    |
| Cambooya         | RR[499] | 0.29        | 0.68        | 1.51        | 1189  |

|                                  |         |             |             |             |       |
|----------------------------------|---------|-------------|-------------|-------------|-------|
| Cambridge (Qld)                  | RR[500] | 0.45        | 1.41        | 4.22        | 34    |
| Cambroon                         | RR[501] | 0.45        | 1.30        | 3.44        | 180   |
| Cameby                           | RR[502] | 0.27        | 0.86        | 2.42        | 47    |
| Cameron Corner                   | RR[503] | 0.35        | 1.21        | 4.15        | 5     |
| Camira (Qld)                     | RR[504] | 0.50        | 0.85        | 1.32        | 5938  |
| Camoola                          | RR[505] | 0.51        | 1.39        | 3.71        | 23    |
| Camooweal                        | RR[506] | 0.61        | 1.79        | 4.41        | 162   |
| Camp Creek (Qld)                 | RR[507] | 0.39        | 1.12        | 2.94        | 131   |
| Camp Hill                        | RR[508] | 0.74        | 1.08        | 1.55        | 8574  |
| Camp Mountain                    | RR[509] | 0.41        | 0.96        | 2.03        | 1112  |
| Campaspe                         | RR[510] | 0.32        | 1.04        | 2.83        | 93    |
| Campbell Creek                   | RR[511] | 0.32        | 0.90        | 2.71        | 7     |
| Campbells Pocket                 | RR[512] | 0.23        | 0.71        | 1.89        | 66    |
| Campwin Beach                    | RR[513] | 0.22        | 0.71        | 1.87        | 414   |
| Canaga                           | RR[514] | 0.28        | 0.82        | 2.18        | 81    |
| Canal Creek                      | RR[515] | 0.31        | 0.94        | 2.87        | 8     |
| Cania                            | RR[516] | 0.30        | 0.82        | 2.25        | 24    |
| Canina                           | RR[517] | 0.21        | 0.65        | 1.77        | 303   |
| Cannindah                        | RR[518] | 0.27        | 0.82        | 2.53        | 29    |
| Canning Creek                    | RR[519] | 0.29        | 0.88        | 2.55        | 5     |
| Canningvale                      | RR[520] | 0.24        | 0.71        | 1.92        | 124   |
| Cannon Creek (Scenic Rim - Qld)  | RR[521] | 0.24        | 0.70        | 2.14        | 69    |
| Cannon Creek (Southern Downs - Q | RR[522] | 0.30        | 0.87        | 2.37        | 27    |
| Cannon Hill                      | RR[523] | 0.94        | 1.54        | 2.28        | 4470  |
| Cannon Valley                    | RR[524] | 0.35        | 0.87        | 2.02        | 735   |
| Cannonvale                       | RR[525] | 0.39        | 0.71        | 1.19        | 4495  |
| Canooka                          | RR[526] | 0.35        | 0.94        | 2.52        | 68    |
| Canungra                         | RR[527] | 0.51        | 1.24        | 2.62        | 978   |
| Capalaba                         | RR[528] | 0.61        | 0.87        | 1.19        | 14072 |
| Cape Cleveland                   | RR[529] | 0.65        | 1.85        | 4.71        | 122   |
| Cape Conway                      | RR[530] | 0.30        | 0.83        | 2.55        | 0     |
| Cape Gloucester                  | RR[531] | 0.24        | 0.83        | 2.81        | 56    |
| Cape Hillsborough                | RR[532] | 0.20        | 0.79        | 3.56        | 37    |
| Cape Tribulation                 | RR[533] | 0.45        | 1.31        | 3.87        | 104   |
| Capella                          | RR[534] | 0.21        | 0.57        | 1.42        | 748   |
| Captain Creek                    | RR[535] | 0.25        | 0.74        | 2.00        | 282   |
| Captains Mountain                | RR[536] | 0.28        | 0.79        | 2.27        | 69    |
| Caravonica                       | RR[537] | 0.49        | 1.02        | 2.07        | 1588  |
| Carbine Creek                    | RR[538] | 0.29        | 0.91        | 2.87        | 20    |
| Carbrook                         | RR[539] | 0.28        | 0.71        | 1.61        | 1030  |
| Cardstone                        | RR[540] | 0.38        | 1.16        | 3.61        | 17    |
| Cardwell                         | RR[541] | <b>1.16</b> | <b>2.26</b> | <b>4.05</b> | 1169  |
| Carina (Qld)                     | RR[542] | 0.60        | 0.91        | 1.33        | 9139  |
| Carina Heights                   | RR[543] | 0.32        | 0.55        | 0.97        | 5661  |
| Carindale                        | RR[544] | 0.39        | 0.60        | 0.85        | 13060 |
| Carmila                          | RR[545] | 0.26        | 0.79        | 2.13        | 286   |
| Carmoo                           | RR[546] | 0.55        | 1.65        | 4.43        | 159   |
| Carnarvon Park                   | RR[547] | 0.38        | 1.06        | 2.97        | 3     |
| Carneys Creek                    | RR[548] | 0.24        | 0.69        | 1.98        | 38    |
| Carole Park                      | RR[549] | 0.34        | 1.10        | 3.10        | 4     |

|                                    |         |             |             |             |       |
|------------------------------------|---------|-------------|-------------|-------------|-------|
| Caroline Crossing                  | RR[550] | 0.38        | 1.16        | 3.53        | 5     |
| Carpendale                         | RR[551] | 0.21        | 0.67        | 2.07        | 105   |
| Carpentaria                        | RR[552] | 0.53        | 1.67        | 4.79        | 9     |
| Carrandotta                        | RR[553] | 0.52        | 1.48        | 4.71        | 0     |
| Carrara                            | RR[554] | 0.35        | 0.57        | 0.88        | 10011 |
| Carrington (Qld)                   | RR[555] | 0.46        | 1.29        | 3.45        | 153   |
| Carruchan                          | RR[556] | 0.36        | 1.03        | 2.69        | 217   |
| Carseldine                         | RR[557] | 0.43        | 0.70        | 1.08        | 7949  |
| Carstairs                          | RR[558] | 0.38        | 1.06        | 3.00        | 97    |
| Carters Ridge                      | RR[559] | 0.23        | 0.63        | 1.60        | 386   |
| Cashmere                           | RR[560] | 0.20        | 0.45        | 0.91        | 3779  |
| Cassowary                          | RR[561] | 0.37        | 1.07        | 2.99        | 98    |
| Castaways Beach                    | RR[562] | 0.24        | 0.61        | 1.62        | 546   |
| Castle Creek (Qld)                 | RR[563] | 0.31        | 0.93        | 2.60        | 19    |
| Castle Hill (Qld)                  | RR[564] | 0.48        | 1.16        | 2.42        | 781   |
| Cattle Creek (North Burnett - Qld) | RR[565] | 0.29        | 0.91        | 2.70        | 25    |
| Cattle Creek (Toowoomba - Qld)     | RR[566] | 0.28        | 0.79        | 2.47        | 19    |
| Causeway Lake                      | RR[567] | 0.71        | 2.00        | 5.86        | 110   |
| Cawarral                           | RR[568] | 0.38        | 0.90        | 2.04        | 653   |
| Cawdor (Qld)                       | RR[569] | 0.21        | 0.62        | 1.75        | 234   |
| Cecil Plains                       | RR[570] | 0.24        | 0.66        | 1.74        | 362   |
| Cedar Creek (Gold Coast - Qld)     | RR[571] | 0.49        | 1.13        | 2.36        | 650   |
| Cedar Creek (Moreton Bay - Qld)    | RR[572] | 0.21        | 0.55        | 1.33        | 553   |
| Cedar Grove                        | RR[573] | 0.14        | 0.38        | 0.89        | 1633  |
| Cedar Pocket                       | RR[574] | 0.28        | 0.83        | 2.35        | 286   |
| Cedar Vale                         | RR[575] | 0.38        | 0.78        | 1.50        | 2081  |
| Cedarton                           | RR[576] | 0.23        | 0.70        | 2.18        | 104   |
| Cement Mills                       | RR[577] | 0.28        | 0.86        | 2.77        | 13    |
| Centenary Heights                  | RR[578] | 0.42        | 0.77        | 1.25        | 4946  |
| Ceratodus                          | RR[579] | 0.27        | 0.88        | 2.68        | 22    |
| Chahpingah                         | RR[580] | 0.31        | 0.84        | 2.50        | 26    |
| Chambers Flat                      | RR[581] | 0.59        | 1.13        | 2.05        | 1924  |
| Chances Plain                      | RR[582] | 0.29        | 0.84        | 2.28        | 116   |
| Chandler (Qld)                     | RR[583] | 0.29        | 0.68        | 1.62        | 1162  |
| Chapel Hill (Qld)                  | RR[584] | 0.27        | 0.47        | 0.76        | 8152  |
| Charlestown (Qld)                  | RR[585] | 0.30        | 0.82        | 2.31        | 58    |
| Charleville                        | RR[586] | <b>1.07</b> | <b>1.78</b> | <b>2.84</b> | 2615  |
| Charlton (Qld)                     | RR[587] | 0.23        | 0.68        | 1.94        | 104   |
| Charlwood                          | RR[588] | 0.25        | 0.66        | 1.76        | 123   |
| Charters Towers City               | RR[589] | <b>2.68</b> | <b>4.14</b> | <b>6.18</b> | 1706  |
| Chatsworth (Qld)                   | RR[590] | 0.27        | 0.66        | 1.54        | 852   |
| Cheeseborough                      | RR[591] | 0.30        | 0.94        | 2.76        | 3     |
| Chelmer                            | RR[592] | <b>1.13</b> | <b>2.03</b> | <b>3.32</b> | 2303  |
| Chelmsford                         | RR[593] | 0.29        | 0.83        | 2.32        | 97    |
| Chelona                            | RR[594] | 0.26        | 0.83        | 2.38        | 80    |
| Cheltenham (Qld)                   | RR[595] | 0.31        | 0.92        | 2.81        | 17    |
| Cherbourg                          | RR[596] | 0.29        | 0.75        | 1.62        | 805   |
| Chermside                          | RR[597] | 0.52        | 0.83        | 1.27        | 8104  |
| Chermside West                     | RR[598] | 0.33        | 0.61        | 1.05        | 5329  |
| Cherry Creek                       | RR[599] | 0.28        | 0.86        | 2.44        | 44    |

|                              |         |             |             |             |       |
|------------------------------|---------|-------------|-------------|-------------|-------|
| Cherry Gully                 | RR[600] | 0.26        | 0.80        | 2.66        | 9     |
| Cherwell                     | RR[601] | 0.36        | 1.05        | 2.95        | 5     |
| Chevallum                    | RR[602] | 0.28        | 0.76        | 1.95        | 355   |
| Chewko                       | RR[603] | 0.44        | 1.29        | 3.32        | 165   |
| Childers (Qld)               | RR[604] | <b>1.71</b> | <b>2.91</b> | <b>4.77</b> | 1354  |
| Chillagoe                    | RR[605] | 0.37        | 1.02        | 2.65        | 207   |
| Chinchilla                   | RR[606] | 0.52        | 0.89        | 1.40        | 5014  |
| Chinghee Creek               | RR[607] | 0.23        | 0.76        | 2.45        | 20    |
| Chirnside                    | RR[608] | 0.25        | 0.83        | 2.29        | 22    |
| Chorregon                    | RR[609] | 0.47        | 1.45        | 3.94        | 52    |
| Christmas Creek              | RR[610] | 0.25        | 0.74        | 2.23        | 40    |
| Churchable                   | RR[611] | 0.43        | 1.19        | 3.13        | 225   |
| Churchill (Qld)              | RR[612] | 0.39        | 0.86        | 1.70        | 1449  |
| Chuwar                       | RR[613] | 0.24        | 0.55        | 1.22        | 1731  |
| Cinnabar                     | RR[614] | 0.28        | 0.83        | 2.33        | 56    |
| Clagiraba                    | RR[615] | 0.31        | 0.75        | 1.73        | 479   |
| Clairview                    | RR[616] | 0.27        | 0.89        | 2.80        | 134   |
| Clara Creek                  | RR[617] | 0.39        | 1.11        | 3.12        | 33    |
| Claraville                   | RR[618] | 0.54        | 1.49        | 4.37        | 5     |
| Clare (Qld)                  | RR[619] | 0.44        | 1.29        | 3.38        | 163   |
| Clarendon (Qld)              | RR[620] | 0.26        | 0.74        | 2.07        | 191   |
| Clarke Creek                 | RR[621] | 0.31        | 0.92        | 2.67        | 26    |
| Clayfield                    | RR[622] | <b>1.17</b> | <b>1.59</b> | <b>2.12</b> | 8910  |
| Clear Island Waters          | RR[623] | 0.39        | 0.77        | 1.34        | 3554  |
| Clear Mountain               | RR[624] | 0.29        | 0.78        | 1.94        | 605   |
| Clemant                      | RR[625] | 0.32        | 1.00        | 2.94        | 0     |
| Clermont                     | RR[626] | 0.99        | 1.71        | 2.76        | 2328  |
| Cleveland (Qld)              | RR[627] | 0.78        | 1.07        | 1.43        | 12700 |
| Clifford                     | RR[628] | 0.34        | 0.92        | 2.65        | 22    |
| Clifton (Qld)                | RR[629] | 0.53        | 1.16        | 2.17        | 1189  |
| Clifton Beach (Qld)          | RR[630] | 0.21        | 0.48        | 1.01        | 2571  |
| Clinton (Qld)                | RR[631] | 0.35        | 0.64        | 1.17        | 4436  |
| Clintonvale                  | RR[632] | 0.28        | 0.74        | 2.07        | 60    |
| Cloncurry                    | RR[633] | 0.99        | 1.68        | 2.75        | 2169  |
| Clontarf (Moreton Bay - Qld) | RR[634] | 0.83        | 1.24        | 1.83        | 6870  |
| Clontarf (Toowoomba - Qld)   | RR[635] | 0.29        | 0.84        | 2.58        | 18    |
| Closeburn                    | RR[636] | 0.24        | 0.70        | 1.67        | 465   |
| Cloyna                       | RR[637] | 0.25        | 0.78        | 2.37        | 105   |
| Cluden                       | RR[638] | 0.34        | 0.85        | 2.23        | 359   |
| Clumber                      | RR[639] | 0.24        | 0.70        | 2.01        | 56    |
| Coal Creek                   | RR[640] | 0.29        | 0.86        | 2.58        | 47    |
| Coalbank                     | RR[641] | 0.29        | 0.82        | 2.44        | 24    |
| Coalfalls                    | RR[642] | 0.59        | 1.39        | 2.95        | 724   |
| Coalstoun Lakes              | RR[643] | 0.32        | 0.93        | 2.52        | 92    |
| Cobbs Hill                   | RR[644] | 0.30        | 0.88        | 2.47        | 16    |
| Cobraball                    | RR[645] | 0.31        | 1.00        | 2.94        | 56    |
| Cockatoo (Qld)               | RR[646] | 0.31        | 0.95        | 2.77        | 29    |
| Coconuts                     | RR[647] | 0.35        | 1.10        | 2.93        | 186   |
| Coen                         | RR[648] | 0.48        | 1.30        | 3.28        | 273   |
| Coes Creek                   | RR[649] | 0.19        | 0.51        | 1.19        | 1121  |

|                        |         |             |             |             |      |
|------------------------|---------|-------------|-------------|-------------|------|
| Coles Creek            | RR[650] | 0.25        | 0.74        | 2.09        | 40   |
| Colevale               | RR[651] | 0.34        | 1.09        | 3.43        | 17   |
| Coleyville             | RR[652] | 0.20        | 0.61        | 1.69        | 155  |
| Colinton (Qld)         | RR[653] | 0.26        | 0.81        | 2.29        | 57   |
| Collaroy (Qld)         | RR[654] | 0.32        | 0.95        | 2.79        | 9    |
| College View           | RR[655] | 0.25        | 0.69        | 2.04        | 71   |
| Collingwood Park (Qld) | RR[656] | 0.29        | 0.56        | 0.99        | 5200 |
| Collinsville (Qld)     | RR[657] | 0.76        | 1.69        | 3.33        | 1040 |
| Colosseum              | RR[658] | 0.36        | 0.96        | 2.45        | 172  |
| Columbia               | RR[659] | 0.40        | 1.13        | 3.09        | 80   |
| Columboola             | RR[660] | 0.31        | 0.89        | 2.33        | 57   |
| Comet                  | RR[661] | 0.27        | 0.72        | 1.77        | 380  |
| Commissioners Flat     | RR[662] | 0.25        | 0.75        | 2.38        | 21   |
| Como (Qld)             | RR[663] | 0.29        | 0.79        | 2.13        | 40   |
| Comoon Loop            | RR[664] | 0.45        | 1.37        | 3.84        | 48   |
| Cona Creek             | RR[665] | 0.34        | 0.94        | 2.75        | 58   |
| Condamine              | RR[666] | 0.46        | 1.21        | 2.82        | 310  |
| Condamine Farms        | RR[667] | 0.26        | 0.82        | 2.56        | 23   |
| Condamine Plains       | RR[668] | 0.25        | 0.76        | 2.10        | 83   |
| Condon                 | RR[669] | 0.47        | 0.84        | 1.40        | 4533 |
| Conjuboy               | RR[670] | 0.41        | 1.31        | 3.66        | 3    |
| Conondale              | RR[671] | 0.29        | 0.73        | 1.76        | 698  |
| Consuelo               | RR[672] | 0.35        | 0.99        | 2.97        | 30   |
| Conway                 | RR[673] | 0.31        | 0.84        | 2.45        | 156  |
| Conway Beach           | RR[674] | 0.27        | 0.87        | 2.81        | 72   |
| Coochiemudlo Island    | RR[675] | 0.67        | 1.76        | 3.73        | 677  |
| Coochin                | RR[676] | 0.23        | 0.67        | 1.76        | 87   |
| Coochin Creek          | RR[677] | 0.27        | 0.73        | 2.09        | 68   |
| Cooee Bay              | RR[678] | 0.38        | 0.97        | 2.07        | 751  |
| Cooeimbardi            | RR[679] | 0.41        | 1.17        | 3.40        | 7    |
| Cooktown               | RR[680] | <b>1.87</b> | <b>3.04</b> | <b>4.65</b> | 2110 |
| Coolabine              | RR[681] | 0.25        | 0.80        | 2.40        | 65   |
| Coolabunia             | RR[682] | 0.27        | 0.77        | 2.22        | 133  |
| Cooladdi               | RR[683] | 0.41        | 1.14        | 3.21        | 13   |
| Coolana                | RR[684] | 0.23        | 0.67        | 1.88        | 154  |
| Coolangatta (Qld)      | RR[685] | <b>1.02</b> | <b>1.60</b> | <b>2.29</b> | 5461 |
| Coolbie                | RR[686] | 0.36        | 1.03        | 3.24        | 81   |
| Coolmunda              | RR[687] | 0.51        | 1.45        | 4.08        | 111  |
| Cooloola               | RR[688] | 0.31        | 0.83        | 2.39        | 3    |
| Cooloola Cove          | RR[689] | 0.34        | 0.76        | 1.47        | 2269 |
| Cooloolabin            | RR[690] | 0.25        | 0.74        | 1.87        | 219  |
| Coolum Beach           | RR[691] | 0.57        | 0.90        | 1.40        | 6967 |
| Coombabah              | RR[692] | 0.65        | 0.98        | 1.45        | 8737 |
| Coomera                | RR[693] | 0.16        | 0.30        | 0.52        | 9454 |
| Coominglah             | RR[694] | 0.31        | 0.85        | 2.39        | 15   |
| Coominglah Forest      | RR[695] | 0.29        | 0.86        | 2.36        | 0    |
| Coominya               | RR[696] | 0.70        | 1.47        | 2.97        | 977  |
| Coomoo                 | RR[697] | 0.33        | 0.96        | 2.77        | 23   |
| Coomrith               | RR[698] | 0.30        | 0.93        | 2.71        | 32   |
| Coonambula             | RR[699] | 0.31        | 0.87        | 2.68        | 54   |

|                  |         |      |      |      |       |
|------------------|---------|------|------|------|-------|
| Coonarr          | RR[700] | 0.36 | 1.14 | 3.10 | 204   |
| Coondoo          | RR[701] | 0.28 | 0.79 | 2.21 | 66    |
| Coongoola        | RR[702] | 0.37 | 1.14 | 3.77 | 10    |
| Coopers Plains   | RR[703] | 0.63 | 1.06 | 1.68 | 4654  |
| Coorada          | RR[704] | 0.35 | 0.96 | 2.71 | 6     |
| Cooran           | RR[705] | 0.23 | 0.57 | 1.19 | 1298  |
| Cooranga         | RR[706] | 0.26 | 0.77 | 2.14 | 102   |
| Cooroibah        | RR[707] | 0.23 | 0.55 | 1.19 | 1656  |
| Cooroo Lands     | RR[708] | 0.33 | 1.18 | 4.35 | 3     |
| Coorooman        | RR[709] | 0.70 | 1.86 | 5.19 | 80    |
| Cooroy           | RR[710] | 0.80 | 1.34 | 2.13 | 3111  |
| Cooroy Mountain  | RR[711] | 0.37 | 1.06 | 3.19 | 112   |
| Coorparoo        | RR[712] | 0.60 | 0.86 | 1.18 | 13745 |
| Coorumba         | RR[713] | 0.39 | 1.12 | 2.98 | 106   |
| Coorumbene       | RR[714] | 0.34 | 1.04 | 2.97 | 2     |
| Cootharaba       | RR[715] | 0.28 | 0.71 | 1.54 | 690   |
| Coowonga         | RR[716] | 0.36 | 1.01 | 2.55 | 211   |
| Cooya Beach      | RR[717] | 0.86 | 2.17 | 4.77 | 450   |
| Cooyar           | RR[718] | 0.27 | 0.76 | 1.98 | 194   |
| Coppabella (Qld) | RR[719] | 0.32 | 0.84 | 2.08 | 430   |
| Coquette Point   | RR[720] | 0.55 | 1.73 | 5.47 | 74    |
| Coral Cove       | RR[721] | 0.22 | 0.58 | 1.41 | 1003  |
| Coral Sea        | RR[722] | 0.37 | 1.24 | 3.93 | 111   |
| Coralie          | RR[723] | 0.48 | 1.48 | 4.79 | 6     |
| Cordalba         | RR[724] | 0.49 | 1.29 | 3.16 | 365   |
| Cordelia         | RR[725] | 0.60 | 1.59 | 4.48 | 174   |
| Corella          | RR[726] | 0.27 | 0.74 | 2.27 | 49    |
| Corfield         | RR[727] | 0.44 | 1.31 | 3.35 | 154   |
| Corinda          | RR[728] | 0.56 | 0.97 | 1.59 | 4045  |
| Coringa          | RR[729] | 0.34 | 0.89 | 2.54 | 68    |
| Corndale (Qld)   | RR[730] | 0.27 | 0.82 | 2.64 | 39    |
| Cornish Creek    | RR[731] | 0.44 | 1.30 | 3.74 | 16    |
| Cornubia         | RR[732] | 0.28 | 0.52 | 0.89 | 5855  |
| Cornwall (Qld)   | RR[733] | 0.36 | 1.09 | 3.14 | 11    |
| Cosgrove (Qld)   | RR[734] | 0.24 | 0.77 | 1.94 | 234   |
| Cotherstone      | RR[735] | 0.23 | 0.79 | 2.55 | 0     |
| Cotswold Hills   | RR[736] | 0.24 | 0.63 | 1.41 | 1041  |
| Cottonvale (Qld) | RR[737] | 0.26 | 0.82 | 2.23 | 127   |
| Coulson          | RR[738] | 0.32 | 0.86 | 2.31 | 161   |
| Coverty          | RR[739] | 0.47 | 1.40 | 3.90 | 130   |
| Cow Bay          | RR[740] | 0.46 | 1.49 | 4.21 | 181   |
| Cowan Cowan      | RR[741] | 0.00 | 0.00 | 0.00 | 28    |
| Cowley           | RR[742] | 0.39 | 1.15 | 3.09 | 70    |
| Cowley Beach     | RR[743] | 0.39 | 1.20 | 3.47 | 68    |
| Cowley Creek     | RR[744] | 0.41 | 1.26 | 3.95 | 10    |
| Cracow           | RR[745] | 0.54 | 1.50 | 4.41 | 84    |
| Craiglie         | RR[746] | 0.33 | 0.84 | 2.05 | 783   |
| Craignish        | RR[747] | 0.44 | 0.94 | 1.90 | 1478  |
| Cranbrook (Qld)  | RR[748] | 0.73 | 1.16 | 1.83 | 4887  |
| Cranley          | RR[749] | 0.24 | 0.57 | 1.29 | 1272  |



|                     |         |             |             |             |      |
|---------------------|---------|-------------|-------------|-------------|------|
| Crawford            | RR[750] | 0.26        | 0.76        | 2.33        | 112  |
| Crediton            | RR[751] | 0.28        | 0.81        | 2.13        | 66   |
| Cremorne (Qld)      | RR[752] | 0.23        | 0.93        | 3.66        | 30   |
| Cressbrook          | RR[753] | 0.29        | 0.83        | 2.20        | 98   |
| Cressbrook Creek    | RR[754] | 0.30        | 0.88        | 2.44        | 20   |
| Crestmead           | RR[755] | 0.35        | 0.57        | 0.93        | 8699 |
| Crimea              | RR[756] | 0.31        | 1.05        | 3.14        | 11   |
| Crinum              | RR[757] | 0.27        | 0.79        | 2.44        | 61   |
| Croftby             | RR[758] | 0.23        | 0.67        | 1.75        | 114  |
| Crohamhurst         | RR[759] | 0.24        | 0.67        | 2.01        | 184  |
| Cromarty            | RR[760] | 0.41        | 1.24        | 3.81        | 21   |
| Crossdale           | RR[761] | 0.37        | 1.01        | 2.69        | 69   |
| Crossroads          | RR[762] | 0.29        | 0.82        | 2.23        | 92   |
| Crowley Vale        | RR[763] | 0.21        | 0.70        | 2.01        | 71   |
| Crownthorpe         | RR[764] | 0.29        | 0.83        | 2.52        | 38   |
| Crows Nest (Qld)    | RR[765] | 0.85        | 1.59        | 2.78        | 1758 |
| Croydon (Qld)       | RR[766] | 0.42        | 1.28        | 3.12        | 201  |
| Cryna               | RR[767] | 0.24        | 0.70        | 2.09        | 100  |
| Crystal Brook (Qld) | RR[768] | 0.32        | 0.88        | 2.44        | 137  |
| Crystal Creek (Qld) | RR[769] | 0.36        | 1.07        | 3.33        | 6    |
| Crystalbrook        | RR[770] | 0.45        | 1.21        | 3.79        | 11   |
| Cullinane           | RR[771] | 0.48        | 1.15        | 2.83        | 449  |
| Cungulla            | RR[772] | 0.52        | 1.78        | 5.00        | 254  |
| Cunnamulla          | RR[773] | 0.61        | 1.33        | 2.77        | 873  |
| Cunningham (Qld)    | RR[774] | 0.27        | 0.78        | 2.55        | 57   |
| Curra               | RR[775] | 0.49        | 1.03        | 1.99        | 1510 |
| Currajah            | RR[776] | 0.44        | 1.29        | 3.65        | 55   |
| Currajong           | RR[777] | <b>1.68</b> | <b>2.69</b> | <b>4.21</b> | 2065 |
| Curramore (Qld)     | RR[778] | 0.44        | 1.19        | 3.26        | 163  |
| Currimundi          | RR[779] | 0.70        | 1.16        | 1.74        | 5437 |
| Currumbin           | RR[780] | <b>1.30</b> | <b>2.14</b> | <b>3.52</b> | 2413 |
| Currumbin Valley    | RR[781] | 0.51        | 1.13        | 2.15        | 1493 |
| Currumbin Waters    | RR[782] | 0.74        | 1.13        | 1.69        | 7371 |
| Curtis Island       | RR[783] | 0.03        | 0.71        | 3.91        | 323  |
| Cushnie             | RR[784] | 0.29        | 0.81        | 2.42        | 105  |
| Cutella             | RR[785] | 0.22        | 0.72        | 2.21        | 20   |
| Cuttaburra          | RR[786] | 0.35        | 1.14        | 3.30        | 10   |
| Cynthia             | RR[787] | 0.26        | 0.86        | 2.39        | 24   |
| Cypress Gardens     | RR[788] | 0.25        | 0.82        | 2.61        | 85   |
| Dagmar              | RR[790] | 0.44        | 1.45        | 4.24        | 0    |
| D'Aguilar           | RR[789] | 0.30        | 0.79        | 1.81        | 924  |
| Dagun               | RR[791] | 0.23        | 0.69        | 1.91        | 124  |
| Daintree            | RR[792] | 0.40        | 1.22        | 3.61        | 113  |
| Daisy Hill (Qld)    | RR[793] | 0.39        | 0.71        | 1.17        | 5240 |
| Dajarra             | RR[794] | 0.59        | 1.71        | 4.93        | 133  |
| Dakabin             | RR[795] | 0.30        | 0.65        | 1.31        | 2697 |
| Dakenba             | RR[796] | 0.27        | 0.80        | 2.29        | 97   |
| Dalbeg              | RR[797] | 0.36        | 1.05        | 3.00        | 64   |
| Dalby               | RR[798] | 0.77        | 1.12        | 1.56        | 9748 |
| Dalcouth            | RR[799] | 0.37        | 1.09        | 3.45        | 136  |

|                   |         |             |             |             |       |
|-------------------|---------|-------------|-------------|-------------|-------|
| Dalga             | RR[800] | 0.25        | 0.84        | 2.57        | 3     |
| Dallarnil         | RR[801] | 0.28        | 0.83        | 2.21        | 194   |
| Dalma             | RR[802] | 0.32        | 0.98        | 2.69        | 64    |
| Dalrymple Creek   | RR[803] | 0.40        | 1.21        | 3.40        | 85    |
| Dalrymple Heights | RR[804] | 0.26        | 0.85        | 2.73        | 41    |
| Dalveen           | RR[805] | 0.27        | 0.75        | 2.00        | 289   |
| Dalwogon          | RR[806] | 0.30        | 0.89        | 2.98        | 27    |
| Dalysford         | RR[807] | 0.27        | 0.79        | 2.33        | 99    |
| Damascus          | RR[808] | 0.28        | 0.80        | 2.36        | 89    |
| Damper Creek      | RR[809] | 0.43        | 1.27        | 3.44        | 42    |
| Danbulla          | RR[810] | 0.39        | 1.13        | 2.92        | 40    |
| Danderoo          | RR[811] | 0.23        | 0.71        | 2.13        | 21    |
| Dangore           | RR[812] | 0.40        | 1.15        | 3.33        | 29    |
| Daradgee          | RR[813] | 0.40        | 1.13        | 3.38        | 65    |
| Dargal Road       | RR[814] | 0.32        | 0.98        | 2.59        | 110   |
| Darling Heights   | RR[815] | 0.45        | 0.80        | 1.41        | 4004  |
| Darlington (Qld)  | RR[816] | 0.32        | 0.99        | 2.74        | 61    |
| Darr Creek        | RR[817] | 0.32        | 0.90        | 2.62        | 18    |
| Darra             | RR[818] | 0.40        | 0.77        | 1.33        | 3503  |
| Darts Creek       | RR[819] | 0.54        | 1.55        | 4.31        | 125   |
| Dauan Island      | RR[820] | 0.39        | 1.88        | 6.94        | 113   |
| Daveson           | RR[821] | 0.33        | 1.18        | 3.76        | 17    |
| Dayboro           | RR[822] | 0.29        | 0.69        | 1.43        | 1599  |
| Daymar            | RR[823] | 0.28        | 0.92        | 2.78        | 25    |
| Deagon            | RR[824] | 0.89        | 1.47        | 2.44        | 3023  |
| Deception Bay     | RR[825] | 0.56        | 0.79        | 1.09        | 15559 |
| Dedin             | RR[826] | 0.47        | 1.36        | 3.77        | 0     |
| Deebing Heights   | RR[827] | 0.21        | 0.50        | 1.14        | 1526  |
| Deep Creek (Qld)  | RR[828] | 0.31        | 0.94        | 2.82        | 13    |
| Deepwater (Qld)   | RR[829] | 0.34        | 1.02        | 2.61        | 188   |
| Deeragun          | RR[830] | 0.29        | 0.61        | 1.14        | 3096  |
| Deeral            | RR[831] | 0.41        | 1.10        | 3.17        | 113   |
| Degarra           | RR[832] | 0.42        | 1.45        | 4.47        | 85    |
| Degilbo           | RR[833] | 0.29        | 0.88        | 2.47        | 140   |
| Delan             | RR[834] | 0.27        | 0.76        | 2.03        | 247   |
| Delaneys Creek    | RR[835] | 0.26        | 0.66        | 1.45        | 858   |
| Depot Hill        | RR[836] | <b>1.11</b> | <b>2.25</b> | <b>4.10</b> | 850   |
| Derri Derra       | RR[837] | 0.33        | 0.84        | 2.22        | 119   |
| Derrymore         | RR[838] | 0.24        | 0.70        | 1.98        | 68    |
| Desailly          | RR[839] | 0.44        | 1.27        | 4.44        | 0     |
| Deuchar           | RR[840] | 0.33        | 0.89        | 2.44        | 235   |
| Devereux Creek    | RR[841] | 0.27        | 0.70        | 1.83        | 322   |
| Devon Park (Qld)  | RR[842] | 0.25        | 0.77        | 2.22        | 38    |
| Diamantina Lakes  | RR[843] | 0.48        | 1.41        | 4.13        | 13    |
| Diamond Valley    | RR[844] | 0.20        | 0.57        | 1.56        | 408   |
| Diamondvale       | RR[845] | 0.27        | 0.91        | 3.08        | 44    |
| Diamondy          | RR[846] | 0.32        | 0.86        | 2.37        | 42    |
| Dicky Beach       | RR[847] | 0.34        | 0.79        | 1.58        | 1612  |
| Didcot            | RR[848] | 0.32        | 0.94        | 2.91        | 45    |
| Diddillibah       | RR[849] | 0.30        | 0.72        | 1.51        | 1129  |

|                            |         |      |      |      |      |
|----------------------------|---------|------|------|------|------|
| Diglum                     | RR[850] | 0.28 | 0.77 | 2.11 | 33   |
| Dimbulah                   | RR[851] | 0.63 | 1.42 | 2.92 | 866  |
| Dingo                      | RR[852] | 0.42 | 1.02 | 2.70 | 271  |
| Dingo Beach                | RR[853] | 0.27 | 1.03 | 3.68 | 155  |
| Dingo Pocket               | RR[854] | 0.40 | 1.13 | 3.24 | 75   |
| Dinmore                    | RR[855] | 0.37 | 0.91 | 2.11 | 690  |
| Dirnbir                    | RR[856] | 0.32 | 0.93 | 2.60 | 43   |
| Dirranbandi                | RR[857] | 0.35 | 0.87 | 2.14 | 521  |
| Dittmer                    | RR[858] | 0.31 | 0.91 | 3.03 | 62   |
| Diwan                      | RR[859] | 0.50 | 1.57 | 4.93 | 137  |
| Dixalea                    | RR[860] | 0.33 | 0.94 | 2.78 | 68   |
| Dixie (Qld)                | RR[861] | 0.44 | 1.39 | 4.13 | 16   |
| Djarawong                  | RR[862] | 0.37 | 1.09 | 3.31 | 79   |
| Djiru                      | RR[863] | 0.41 | 1.21 | 3.47 | 0    |
| Djuan                      | RR[864] | 0.38 | 1.07 | 3.31 | 77   |
| Doctor Creek               | RR[865] | 0.28 | 0.86 | 2.45 | 29   |
| Dolphin Heads              | RR[866] | 0.22 | 0.75 | 2.20 | 324  |
| Domville                   | RR[867] | 0.24 | 0.80 | 2.81 | 0    |
| Donnybrook (Qld)           | RR[868] | 0.87 | 2.07 | 4.58 | 558  |
| Doolandella                | RR[869] | 0.21 | 0.45 | 0.88 | 3652 |
| Doolbi                     | RR[870] | 0.34 | 1.06 | 3.09 | 106  |
| Doomadgee                  | RR[871] | 0.37 | 1.00 | 2.31 | 861  |
| Doonan                     | RR[872] | 0.40 | 0.80 | 1.44 | 2758 |
| Doongul                    | RR[873] | 0.39 | 1.24 | 3.40 | 26   |
| Dotswood                   | RR[874] | 0.35 | 0.97 | 2.47 | 83   |
| Doughboy                   | RR[875] | 0.31 | 0.87 | 2.61 | 24   |
| Douglas (Toowoomba - Qld)  | RR[876] | 0.25 | 0.72 | 2.12 | 90   |
| Douglas (Townsville - Qld) | RR[877] | 0.16 | 0.33 | 0.60 | 6534 |
| Dowar Islet                | RR[878] | 0.18 | 1.34 | 7.75 | 0    |
| Downsfield                 | RR[879] | 0.30 | 0.83 | 2.45 | 74   |
| Dows Creek                 | RR[880] | 0.28 | 0.84 | 2.33 | 102  |
| Draper                     | RR[881] | 0.28 | 0.69 | 1.66 | 534  |
| Drayton                    | RR[882] | 0.28 | 0.64 | 1.40 | 1402 |
| Drewvale                   | RR[883] | 0.25 | 0.48 | 0.95 | 3264 |
| Drillham                   | RR[884] | 0.30 | 0.88 | 2.48 | 94   |
| Drillham South             | RR[885] | 0.31 | 0.93 | 2.51 | 53   |
| Drinan                     | RR[886] | 0.25 | 0.80 | 2.07 | 136  |
| Dromedary (Qld)            | RR[887] | 0.34 | 0.98 | 2.79 | 4    |
| Drummondslope              | RR[888] | 0.35 | 1.10 | 3.18 | 27   |
| Duaringa                   | RR[889] | 0.39 | 1.08 | 2.95 | 221  |
| Duchess                    | RR[890] | 0.57 | 1.63 | 4.75 | 18   |
| Duckinwilla                | RR[891] | 0.37 | 0.94 | 2.58 | 12   |
| Ducklo                     | RR[892] | 0.27 | 0.68 | 1.97 | 249  |
| Dugandan                   | RR[893] | 0.22 | 0.61 | 1.54 | 475  |
| Duingal                    | RR[894] | 0.28 | 0.82 | 2.39 | 65   |
| Dulacca                    | RR[895] | 0.38 | 1.09 | 2.98 | 147  |
| Dulong                     | RR[896] | 0.38 | 0.97 | 2.29 | 474  |
| Dululu                     | RR[897] | 0.32 | 0.91 | 2.58 | 111  |
| Dumbleton                  | RR[898] | 0.31 | 0.88 | 2.45 | 202  |
| Dumgree                    | RR[899] | 0.30 | 0.88 | 2.48 | 46   |

|                 |         |             |             |             |       |
|-----------------|---------|-------------|-------------|-------------|-------|
| Dumpy Creek     | RR[900] | 0.34        | 0.97        | 2.80        | 11    |
| Dundarra        | RR[901] | 0.29        | 0.98        | 2.95        | 3     |
| Dundas (Qld)    | RR[902] | 0.27        | 0.74        | 2.15        | 63    |
| Dundathu        | RR[903] | 0.24        | 0.79        | 2.21        | 198   |
| Dundowran       | RR[904] | 0.24        | 0.60        | 1.46        | 727   |
| Dundowran Beach | RR[905] | 0.32        | 0.75        | 1.52        | 1734  |
| Dunk            | RR[906] | 0.24        | 1.10        | 4.46        | 21    |
| Dunkeld (Qld)   | RR[907] | 0.33        | 0.99        | 2.79        | 38    |
| Dunmora         | RR[908] | 0.30        | 0.78        | 2.15        | 182   |
| Dunmore (Qld)   | RR[909] | 0.27        | 0.84        | 2.38        | 19    |
| Dunrock         | RR[910] | 0.26        | 0.80        | 2.68        | 64    |
| Dunrobin (Qld)  | RR[911] | 0.41        | 1.14        | 3.22        | 11    |
| Dunwich         | RR[912] | 0.85        | 2.21        | 4.82        | 658   |
| Durack (Qld)    | RR[913] | 0.57        | 0.93        | 1.45        | 6034  |
| Durah           | RR[914] | 0.31        | 0.91        | 2.72        | 3     |
| Durham          | RR[915] | 0.35        | 1.21        | 3.67        | 33    |
| Durham Downs    | RR[916] | 0.33        | 0.98        | 3.02        | 57    |
| Durong          | RR[917] | 0.38        | 1.10        | 2.87        | 190   |
| Dutton Park     | RR[918] | 0.59        | 1.23        | 2.24        | 1729  |
| Dutton River    | RR[919] | 0.47        | 1.38        | 3.92        | 29    |
| Dykehead        | RR[920] | 0.33        | 0.94        | 2.83        | 5     |
| Dynevor         | RR[921] | 0.40        | 1.16        | 3.57        | 17    |
| Dysart (Qld)    | RR[922] | 0.30        | 0.66        | 1.32        | 2200  |
| Eagle Farm      | RR[923] | 0.53        | 1.53        | 4.84        | 0     |
| Eagleby         | RR[924] | 0.47        | 0.71        | 1.04        | 10446 |
| Eaglefield      | RR[925] | 0.29        | 0.90        | 2.66        | 0     |
| Earlville       | RR[926] | 1.00        | 1.58        | 2.54        | 3296  |
| East Barron     | RR[927] | 0.45        | 1.22        | 3.11        | 174   |
| East Brisbane   | RR[928] | <b>1.14</b> | <b>1.69</b> | <b>2.45</b> | 5218  |
| East Cooyar     | RR[929] | 0.27        | 0.81        | 2.67        | 17    |
| East Creek      | RR[930] | 0.45        | 1.57        | 5.14        | 0     |
| East Deep Creek | RR[931] | 0.23        | 0.59        | 1.45        | 536   |
| East End        | RR[932] | 0.30        | 0.87        | 2.55        | 47    |
| East Feluga     | RR[933] | 0.35        | 0.98        | 2.59        | 205   |
| East Greenmount | RR[934] | 0.23        | 0.63        | 1.52        | 304   |
| East Haldon     | RR[935] | 0.23        | 0.74        | 2.00        | 20    |
| East Innisfail  | RR[936] | 0.73        | 1.54        | 2.95        | 1452  |
| East Ipswich    | RR[937] | 0.49        | 1.00        | 1.83        | 1920  |
| East Mackay     | RR[938] | 0.60        | 1.11        | 1.91        | 2953  |
| East Nanango    | RR[939] | 0.30        | 0.77        | 2.16        | 228   |
| East Palmerston | RR[940] | 0.39        | 1.04        | 3.03        | 153   |
| East Russell    | RR[941] | 0.42        | 1.16        | 3.41        | 61    |
| East Toowoomba  | RR[942] | 0.91        | 1.46        | 2.29        | 4187  |
| East Trinity    | RR[943] | 0.38        | 1.07        | 2.87        | 179   |
| Eastern Heights | RR[944] | 0.80        | 1.41        | 2.31        | 3018  |
| Eaton (Qld)     | RR[945] | 0.37        | 1.17        | 3.36        | 36    |
| Eatons Hill     | RR[946] | 0.24        | 0.46        | 0.81        | 6036  |
| Ebbw Vale       | RR[947] | 0.25        | 0.66        | 1.75        | 422   |
| Ebenezer (Qld)  | RR[948] | 0.21        | 0.61        | 1.62        | 260   |
| Edens Landing   | RR[949] | 0.23        | 0.48        | 0.87        | 3898  |

|                               |         |             |             |             |       |
|-------------------------------|---------|-------------|-------------|-------------|-------|
| Edge Hill                     | RR[950] | 0.64        | 1.10        | 1.87        | 3157  |
| Edmonton                      | RR[951] | 0.70        | 1.06        | 1.57        | 7887  |
| Edward River                  | RR[952] | 0.58        | 1.76        | 5.58        | 0     |
| Eerwah Vale                   | RR[953] | 0.30        | 0.77        | 1.98        | 499   |
| Egypt                         | RR[954] | 0.23        | 0.67        | 2.01        | 15    |
| Eidsvold                      | RR[955] | 0.34        | 0.88        | 2.20        | 462   |
| Eidsvold East                 | RR[956] | 0.31        | 0.84        | 2.52        | 20    |
| Eidsvold West                 | RR[957] | 0.34        | 0.88        | 2.38        | 56    |
| Eight Mile Creek (Qld)        | RR[958] | 0.39        | 1.10        | 3.28        | 0     |
| Eight Mile Plains             | RR[959] | 0.30        | 0.48        | 0.72        | 12755 |
| Eimeo                         | RR[960] | 0.33        | 0.73        | 1.47        | 2418  |
| Einasleigh                    | RR[961] | 0.54        | 1.56        | 4.24        | 78    |
| El Arish                      | RR[962] | 0.47        | 1.20        | 2.95        | 295   |
| Elaman Creek                  | RR[963] | 0.27        | 0.76        | 2.43        | 65    |
| Elanora                       | RR[964] | 0.59        | 0.90        | 1.32        | 9823  |
| Elbow Valley                  | RR[965] | 0.24        | 0.74        | 2.31        | 77    |
| Electra                       | RR[966] | 0.31        | 0.87        | 2.60        | 91    |
| Elgin (Qld)                   | RR[967] | 0.33        | 0.98        | 2.74        | 30    |
| Elgin Vale                    | RR[968] | 0.29        | 0.86        | 2.67        | 21    |
| Eli Waters                    | RR[969] | 0.28        | 0.61        | 1.17        | 2625  |
| Elimbah                       | RR[970] | 0.39        | 0.75        | 1.30        | 3174  |
| Ellangowan (Qld)              | RR[971] | 0.42        | 1.27        | 3.35        | 102   |
| Ellen Grove                   | RR[972] | 0.17        | 0.40        | 0.87        | 2147  |
| Ellerbeck                     | RR[973] | 0.38        | 1.04        | 3.01        | 171   |
| Ellesmere                     | RR[974] | 0.44        | 1.21        | 3.11        | 286   |
| Ellinjaa                      | RR[975] | 0.36        | 1.16        | 3.51        | 22    |
| Ellinthorp                    | RR[976] | 0.20        | 0.81        | 3.17        | 15    |
| Elliott (Qld)                 | RR[977] | 0.35        | 0.94        | 2.62        | 106   |
| Elliott Heads                 | RR[978] | 0.81        | 1.70        | 3.53        | 874   |
| Ellis Beach                   | RR[979] | 0.40        | 1.65        | 6.81        | 21    |
| Elphinstone (Isaac - Qld)     | RR[980] | 0.27        | 0.86        | 2.56        | 6     |
| Elphinstone (Toowoomba - Qld) | RR[981] | 0.28        | 0.79        | 2.49        | 56    |
| Emerald (Qld)                 | RR[982] | 0.39        | 0.61        | 0.92        | 10562 |
| Emu Creek (Qld)               | RR[983] | 0.29        | 0.80        | 2.37        | 63    |
| Emu Park                      | RR[984] | <b>1.14</b> | <b>1.95</b> | <b>3.31</b> | 1798  |
| Emu Vale                      | RR[985] | 0.23        | 0.68        | 1.68        | 156   |
| England Creek                 | RR[986] | 0.28        | 0.77        | 2.23        | 24    |
| Enoggera                      | RR[987] | 0.58        | 1.01        | 1.60        | 4290  |
| Enoggera Reservoir            | RR[988] | 0.26        | 0.74        | 1.97        | 19    |
| Epsom (Qld)                   | RR[989] | 0.27        | 0.86        | 2.71        | 6     |
| Erakala                       | RR[990] | 0.22        | 0.64        | 1.64        | 416   |
| Ernestina                     | RR[991] | 0.48        | 1.43        | 4.51        | 12    |
| Eromanga                      | RR[992] | 0.40        | 1.18        | 3.08        | 97    |
| Erub Island                   | RR[993] | 0.23        | 1.27        | 4.57        | 231   |
| Esk (Qld)                     | RR[994] | 0.96        | 1.81        | 3.31        | 1435  |
| Eskdale (Qld)                 | RR[995] | 0.29        | 0.83        | 2.25        | 30    |
| Esmeralda                     | RR[996] | 0.49        | 1.39        | 4.00        | 15    |
| Etna Creek                    | RR[997] | 0.40        | 0.95        | 2.12        | 739   |
| Eton                          | RR[998] | 0.33        | 0.76        | 1.93        | 538   |
| Etty Bay                      | RR[999] | 0.38        | 1.05        | 2.80        | 306   |

|                     |          |      |      |      |      |
|---------------------|----------|------|------|------|------|
| Eubenangee          | RR[1000] | 0.37 | 0.99 | 2.62 | 197  |
| Eudlo               | RR[1001] | 0.29 | 0.75 | 1.70 | 892  |
| Eukey               | RR[1002] | 0.29 | 0.91 | 2.45 | 119  |
| Euleilah            | RR[1003] | 0.27 | 0.75 | 2.27 | 159  |
| Eulo                | RR[1004] | 0.35 | 1.12 | 3.24 | 84   |
| Eumamurrin          | RR[1005] | 0.36 | 0.97 | 2.63 | 77   |
| Eumundi             | RR[1006] | 0.55 | 1.13 | 2.15 | 1765 |
| Eungella (Qld)      | RR[1007] | 0.27 | 0.79 | 2.33 | 157  |
| Eungella Dam        | RR[1008] | 0.32 | 0.88 | 2.60 | 8    |
| Eungella Hinterland | RR[1009] | 0.38 | 1.02 | 2.65 | 3    |
| Euramo              | RR[1010] | 0.38 | 1.07 | 3.17 | 108  |
| Eureka (Qld)        | RR[1011] | 0.35 | 0.94 | 2.69 | 135  |
| Eurella             | RR[1012] | 0.37 | 1.05 | 3.26 | 11   |
| Eurimbula           | RR[1013] | 0.28 | 0.85 | 2.46 | 4    |
| Eurombah            | RR[1014] | 0.33 | 0.94 | 2.52 | 58   |
| Eurong              | RR[1015] | 0.00 | 0.00 | 0.00 | 47   |
| Euthulla            | RR[1016] | 0.40 | 1.05 | 2.62 | 271  |
| Evans Landing       | RR[1017] | 0.26 | 0.97 | 3.28 | 59   |
| Evanslea            | RR[1018] | 0.24 | 0.72 | 2.17 | 32   |
| Evelyn              | RR[1019] | 0.37 | 0.96 | 2.51 | 209  |
| Evergreen           | RR[1020] | 0.28 | 0.81 | 2.52 | 36   |
| Everton Hills       | RR[1021] | 0.40 | 0.74 | 1.24 | 4647 |
| Everton Park        | RR[1022] | 0.69 | 1.05 | 1.52 | 7345 |
| Evora               | RR[1023] | 0.37 | 1.24 | 3.75 | 0    |
| Fairdale            | RR[1024] | 0.27 | 0.82 | 2.62 | 26   |
| Fairfield (Qld)     | RR[1025] | 0.46 | 0.91 | 1.64 | 2602 |
| Fairney View        | RR[1026] | 0.26 | 0.72 | 2.04 | 188  |
| Fairy Bower         | RR[1027] | 0.36 | 1.10 | 3.15 | 77   |
| Fairyland           | RR[1028] | 0.28 | 0.83 | 2.44 | 51   |
| Fairymead           | RR[1029] | 0.33 | 0.92 | 2.56 | 33   |
| Farleigh            | RR[1030] | 0.27 | 0.69 | 1.66 | 654  |
| Farnborough         | RR[1031] | 0.26 | 0.74 | 1.83 | 403  |
| Farnsfield          | RR[1032] | 0.37 | 1.03 | 2.71 | 97   |
| Farrars Creek       | RR[1033] | 0.46 | 1.39 | 4.11 | 0    |
| Fassifern (Qld)     | RR[1034] | 0.23 | 0.70 | 2.16 | 18   |
| Fassifern Valley    | RR[1035] | 0.23 | 0.74 | 2.20 | 66   |
| Federal (Qld)       | RR[1036] | 0.31 | 0.86 | 2.22 | 251  |
| Felton              | RR[1037] | 0.26 | 0.71 | 1.72 | 228  |
| Felton South        | RR[1038] | 0.28 | 0.80 | 2.20 | 49   |
| Feluga              | RR[1039] | 0.35 | 0.98 | 2.58 | 197  |
| Ferney              | RR[1040] | 0.26 | 0.85 | 2.53 | 60   |
| Fernvale (Qld)      | RR[1041] | 0.53 | 1.07 | 1.92 | 2335 |
| Ferny Glen          | RR[1042] | 0.24 | 0.71 | 2.16 | 72   |
| Ferny Grove         | RR[1043] | 0.24 | 0.50 | 0.93 | 4545 |
| Ferny Hills         | RR[1044] | 0.47 | 0.76 | 1.20 | 6834 |
| Ficks Crossing      | RR[1045] | 0.29 | 0.85 | 2.67 | 33   |
| Fielding            | RR[1046] | 0.49 | 1.57 | 4.51 | 6    |
| Fifteen Mile        | RR[1047] | 0.24 | 0.74 | 2.07 | 22   |
| Fig Tree Pocket     | RR[1048] | 0.49 | 0.97 | 1.67 | 3081 |
| Finch Hatton        | RR[1049] | 0.31 | 0.87 | 2.15 | 410  |

|                     |          |      |      |       |       |
|---------------------|----------|------|------|-------|-------|
| Finlayvale          | RR[1050] | 0.45 | 1.38 | 4.46  | 15    |
| Finnie              | RR[1051] | 0.22 | 0.65 | 1.88  | 84    |
| Fisher (Qld)        | RR[1052] | 0.50 | 1.48 | 4.74  | 4     |
| Fishermans Pocket   | RR[1053] | 0.27 | 0.75 | 2.10  | 24    |
| Fishery Falls       | RR[1054] | 0.48 | 1.44 | 3.78  | 123   |
| Fitzgerald Creek    | RR[1055] | 0.38 | 1.18 | 3.43  | 64    |
| Fitzgibbon          | RR[1056] | 0.31 | 0.59 | 1.06  | 4542  |
| Fitzroy Island      | RR[1057] | 0.40 | 1.46 | 5.43  | 44    |
| Flagstone Creek     | RR[1058] | 0.23 | 0.62 | 1.69  | 184   |
| Flametree           | RR[1059] | 0.23 | 0.75 | 2.12  | 106   |
| Flaxton             | RR[1060] | 0.52 | 1.18 | 2.78  | 835   |
| Fletcher (Qld)      | RR[1061] | 0.29 | 0.88 | 2.63  | 83    |
| Fletcher Creek      | RR[1062] | 0.37 | 1.09 | 3.22  | 0     |
| Fleurbaix           | RR[1063] | 0.34 | 1.12 | 3.39  | 33    |
| Flinders View       | RR[1064] | 0.63 | 1.09 | 1.68  | 4519  |
| Flinton             | RR[1065] | 0.30 | 0.88 | 2.53  | 25    |
| Florence Bay        | RR[1066] | 0.60 | 2.74 | 11.10 | 0     |
| Flying Fish Point   | RR[1067] | 0.82 | 2.33 | 5.66  | 343   |
| Flying Fox (Qld)    | RR[1068] | 0.25 | 0.71 | 2.33  | 52    |
| Fordsdale           | RR[1069] | 0.21 | 0.66 | 2.03  | 46    |
| Foreshores          | RR[1070] | 0.24 | 0.76 | 2.39  | 111   |
| Forest Creek        | RR[1071] | 0.42 | 1.25 | 3.54  | 88    |
| Forest Glen (Qld)   | RR[1072] | 0.25 | 0.61 | 1.38  | 1077  |
| Forest Hill (Qld)   | RR[1073] | 0.30 | 0.77 | 1.77  | 803   |
| Forest Lake         | RR[1074] | 0.19 | 0.31 | 0.49  | 17847 |
| Forest Ridge        | RR[1075] | 0.25 | 0.80 | 2.60  | 41    |
| Forest Springs      | RR[1076] | 0.27 | 0.77 | 2.15  | 55    |
| Forestdale          | RR[1077] | 0.33 | 0.77 | 1.53  | 2039  |
| Foresthome          | RR[1078] | 0.44 | 1.37 | 3.94  | 73    |
| Forestvale          | RR[1079] | 0.36 | 1.07 | 2.89  | 39    |
| Fork Lagoons        | RR[1080] | 0.29 | 0.86 | 2.44  | 0     |
| Formartin           | RR[1081] | 0.26 | 0.75 | 2.17  | 67    |
| Forrest Beach (Qld) | RR[1082] | 0.71 | 1.57 | 3.13  | 1073  |
| Forsayth            | RR[1083] | 0.41 | 1.20 | 3.29  | 103   |
| Fortitude Valley    | RR[1084] | 0.48 | 0.79 | 1.25  | 6681  |
| Forty Mile          | RR[1085] | 0.43 | 1.19 | 3.69  | 12    |
| Fossilbrook         | RR[1086] | 0.42 | 1.29 | 4.32  | 2     |
| Foulden             | RR[1087] | 0.25 | 0.82 | 2.49  | 3     |
| Four Ways           | RR[1088] | 0.49 | 1.63 | 5.19  | 15    |
| Foxdale             | RR[1089] | 0.28 | 0.86 | 2.43  | 97    |
| Frankfield          | RR[1090] | 0.33 | 0.96 | 3.09  | 25    |
| Fraser Island       | RR[1091] | 0.00 | 0.00 | 0.00  | 172   |
| Frazerview          | RR[1092] | 0.24 | 0.69 | 2.16  | 31    |
| Fredericksfield     | RR[1093] | 0.34 | 0.98 | 2.65  | 182   |
| Freestone           | RR[1094] | 0.22 | 0.65 | 1.85  | 179   |
| Frenches Creek      | RR[1095] | 0.20 | 0.69 | 2.18  | 74    |
| Frenchville         | RR[1096] | 0.42 | 0.70 | 1.16  | 7205  |
| Freshwater (Qld)    | RR[1097] | 0.40 | 0.86 | 1.78  | 1638  |
| Freshwater Point    | RR[1098] | 0.29 | 0.81 | 2.52  | 123   |
| Friday Pocket       | RR[1099] | 0.37 | 1.11 | 3.34  | 31    |

|                              |          |             |             |             |      |
|------------------------------|----------|-------------|-------------|-------------|------|
| Fulham (Qld)                 | RR[1100] | 0.37        | 1.10        | 3.11        | 27   |
| Gadgarra                     | RR[1101] | 0.37        | 1.09        | 3.10        | 3    |
| Gaeta                        | RR[1102] | 0.26        | 0.78        | 2.30        | 105  |
| Gailes                       | RR[1103] | 0.37        | 0.82        | 1.69        | 1443 |
| Gainsford                    | RR[1104] | 0.34        | 0.96        | 2.69        | 11   |
| Gairloch                     | RR[1105] | 0.45        | 1.32        | 4.23        | 37   |
| Galilee                      | RR[1106] | 0.38        | 1.11        | 3.44        | 16   |
| Gamboola                     | RR[1107] | 0.44        | 1.31        | 4.05        | 20   |
| Gangalidda                   | RR[1108] | 0.33        | 1.48        | 6.89        | 0    |
| Garbutt                      | RR[1109] | <b>1.15</b> | <b>1.94</b> | <b>3.22</b> | 1985 |
| Garfield (Qld)               | RR[1110] | 0.39        | 1.17        | 3.66        | 29   |
| Gargett                      | RR[1111] | 0.34        | 1.00        | 2.52        | 197  |
| Garnant                      | RR[1112] | 0.42        | 1.22        | 3.39        | 87   |
| Garners Beach                | RR[1113] | 0.37        | 1.21        | 4.26        | 25   |
| Garradunga                   | RR[1114] | 0.37        | 1.07        | 2.96        | 116  |
| Garrawalt                    | RR[1115] | 0.40        | 1.25        | 3.22        | 0    |
| Gatton                       | RR[1116] | 0.93        | 1.40        | 2.04        | 5846 |
| Gaven                        | RR[1117] | 0.25        | 0.58        | 1.15        | 1299 |
| Gayndah                      | RR[1118] | 0.37        | 0.81        | 1.60        | 1666 |
| Gaythorne                    | RR[1119] | 0.43        | 0.88        | 1.59        | 2541 |
| Geebung                      | RR[1120] | <b>1.06</b> | <b>1.69</b> | <b>2.54</b> | 3667 |
| Geham                        | RR[1121] | 0.29        | 0.77        | 1.81        | 380  |
| Gemini Mountains             | RR[1122] | 0.27        | 0.82        | 2.43        | 42   |
| Georgetown (Qld)             | RR[1123] | 0.48        | 1.30        | 3.27        | 272  |
| Georgina (Qld)               | RR[1124] | 0.53        | 1.49        | 4.36        | 7    |
| Germantown (Qld)             | RR[1125] | 0.35        | 1.15        | 3.53        | 53   |
| Gheerulla                    | RR[1126] | 0.34        | 0.93        | 2.33        | 184  |
| Ghinghinda                   | RR[1127] | 0.33        | 0.96        | 2.79        | 33   |
| Gidya                        | RR[1128] | 0.52        | 1.65        | 4.73        | 0    |
| Gigoomgan                    | RR[1129] | 0.32        | 0.85        | 2.50        | 29   |
| Gilbert River                | RR[1130] | 0.45        | 1.38        | 3.75        | 35   |
| Gilberton (Etheridge - Qld)  | RR[1131] | 0.45        | 1.35        | 3.91        | 4    |
| Gilberton (Gold Coast - Qld) | RR[1132] | 0.21        | 0.67        | 1.93        | 20   |
| Gilla                        | RR[1133] | 0.31        | 0.85        | 2.37        | 28   |
| Gilldora                     | RR[1134] | 0.23        | 0.70        | 2.20        | 32   |
| Gilston                      | RR[1135] | 0.38        | 0.75        | 1.47        | 1839 |
| Gin Gin (Qld)                | RR[1136] | 0.42        | 0.98        | 2.14        | 882  |
| Gindie                       | RR[1137] | 0.30        | 0.83        | 2.22        | 167  |
| Gindoran                     | RR[1138] | 0.26        | 0.84        | 2.35        | 3    |
| Ginoondan                    | RR[1139] | 0.33        | 0.97        | 2.82        | 13   |
| Girraween (Qld)              | RR[1140] | 0.32        | 1.00        | 2.96        | 9    |
| Giru                         | RR[1141] | <b>1.06</b> | <b>2.61</b> | <b>5.62</b> | 302  |
| Givelda                      | RR[1142] | 0.30        | 0.90        | 2.54        | 42   |
| Gladfield (Qld)              | RR[1143] | 0.25        | 0.69        | 2.22        | 44   |
| Gladstone Central            | RR[1144] | <b>2.16</b> | <b>3.64</b> | <b>5.74</b> | 1355 |
| Gladstone Harbour            | RR[1145] | 0.04        | 1.30        | 10.74       | 29   |
| Glamorgan Vale               | RR[1146] | 0.23        | 0.65        | 1.76        | 357  |
| Glan Devon                   | RR[1147] | 0.37        | 1.01        | 2.63        | 211  |
| Glanmire (Qld)               | RR[1148] | 0.25        | 0.72        | 2.16        | 20   |
| Glass House Mountains        | RR[1149] | 0.45        | 0.86        | 1.48        | 4114 |



|                    |          |             |             |             |      |
|--------------------|----------|-------------|-------------|-------------|------|
| Glastonbury        | RR[1150] | 0.33        | 0.84        | 2.02        | 291  |
| Glebe (Qld)        | RR[1151] | 0.30        | 0.98        | 2.76        | 16   |
| Glen Allyn         | RR[1152] | 0.34        | 1.05        | 2.77        | 124  |
| Glen Aplin         | RR[1153] | 0.32        | 0.94        | 2.43        | 405  |
| Glen Boughton      | RR[1154] | 0.27        | 1.14        | 4.68        | 24   |
| Glen Cairn         | RR[1155] | 0.23        | 0.67        | 1.92        | 95   |
| Glen Echo          | RR[1156] | 0.30        | 0.90        | 2.56        | 27   |
| Glen Eden          | RR[1157] | 0.23        | 0.55        | 1.12        | 2037 |
| Glen Esk           | RR[1158] | 0.31        | 0.90        | 2.72        | 50   |
| Glen Isla          | RR[1159] | 0.39        | 1.24        | 3.37        | 29   |
| Glen Niven         | RR[1160] | 0.22        | 0.80        | 2.98        | 68   |
| Glen Russell       | RR[1161] | 0.37        | 1.15        | 3.47        | 7    |
| Glen Ruth          | RR[1162] | 0.40        | 1.19        | 3.39        | 0    |
| Glenarbon          | RR[1163] | 0.31        | 0.96        | 3.07        | 36   |
| Glenaubyn          | RR[1164] | 0.31        | 0.91        | 2.71        | 30   |
| Glenaven           | RR[1165] | 0.29        | 0.84        | 2.49        | 61   |
| Glenbar            | RR[1166] | 0.29        | 0.89        | 2.63        | 11   |
| Glencoe (Qld)      | RR[1167] | 0.22        | 0.60        | 1.72        | 253  |
| Glendale (Qld)     | RR[1168] | 0.31        | 0.88        | 2.12        | 488  |
| Glenden            | RR[1169] | 0.41        | 1.08        | 2.48        | 466  |
| Gleneagle          | RR[1170] | 0.31        | 0.73        | 1.62        | 1403 |
| Glenella           | RR[1171] | 0.33        | 0.68        | 1.27        | 3506 |
| Glenfern (Qld)     | RR[1172] | 0.28        | 0.80        | 2.33        | 10   |
| Glengallan         | RR[1173] | 0.23        | 0.79        | 2.52        | 43   |
| Glenhaughton       | RR[1174] | 0.32        | 0.98        | 2.95        | 18   |
| Glenlee (Qld)      | RR[1175] | 0.28        | 0.69        | 1.59        | 1013 |
| Glenleigh          | RR[1176] | 0.29        | 0.83        | 2.35        | 27   |
| Glenlyon (Qld)     | RR[1177] | 0.31        | 0.94        | 2.87        | 21   |
| Glenmoral          | RR[1178] | 0.34        | 0.94        | 2.52        | 37   |
| Glenmorgan         | RR[1179] | 0.37        | 1.10        | 3.10        | 116  |
| Glenorchy (Qld)    | RR[1180] | 0.30        | 0.85        | 2.45        | 72   |
| Glenore Grove      | RR[1181] | 0.33        | 0.82        | 1.93        | 724  |
| Glenrae            | RR[1182] | 0.31        | 0.94        | 2.50        | 70   |
| Glenrock (Qld)     | RR[1183] | 0.27        | 0.85        | 2.74        | 37   |
| Glenroy (Qld)      | RR[1184] | 0.36        | 0.95        | 2.82        | 22   |
| Glenvale           | RR[1185] | 0.43        | 0.75        | 1.26        | 5025 |
| Glenview           | RR[1186] | 0.22        | 0.57        | 1.39        | 949  |
| Glenwood (Qld)     | RR[1187] | 0.44        | 1.00        | 2.16        | 1354 |
| Godwin Beach       | RR[1188] | 0.23        | 0.68        | 1.84        | 365  |
| Gogango            | RR[1189] | 0.31        | 0.96        | 2.70        | 96   |
| Golden Beach (Qld) | RR[1190] | <b>1.02</b> | <b>1.58</b> | <b>2.33</b> | 4823 |
| Golden Fleece      | RR[1191] | 0.33        | 0.93        | 2.61        | 42   |
| Goldfields         | RR[1192] | 0.29        | 0.85        | 2.64        | 28   |
| Goldsborough (Qld) | RR[1193] | 0.36        | 0.93        | 2.10        | 685  |
| Gooburrum          | RR[1194] | 0.52        | 1.11        | 2.25        | 1153 |
| Good Night         | RR[1195] | 0.31        | 0.87        | 2.43        | 112  |
| Goodar             | RR[1196] | 0.30        | 0.88        | 2.63        | 45   |
| Goodger            | RR[1197] | 0.27        | 0.79        | 2.23        | 150  |
| Goodna             | RR[1198] | 0.53        | 0.83        | 1.24        | 7716 |
| Goodwood (Qld)     | RR[1199] | 0.34        | 1.00        | 2.47        | 140  |

|                     |          |             |             |             |      |
|---------------------|----------|-------------|-------------|-------------|------|
| Googa Creek         | RR[1200] | 0.28        | 0.84        | 2.63        | 39   |
| Goolboo             | RR[1201] | 0.43        | 1.23        | 3.68        | 16   |
| Goolman             | RR[1202] | 0.29        | 0.90        | 2.75        | 33   |
| Goomally            | RR[1203] | 0.32        | 0.94        | 2.79        | 15   |
| Goombi              | RR[1204] | 0.26        | 0.90        | 2.92        | 23   |
| Goomboorian         | RR[1205] | 0.54        | 1.29        | 3.07        | 418  |
| Goombungee          | RR[1206] | 0.33        | 0.82        | 1.78        | 804  |
| Goomburra           | RR[1207] | 0.24        | 0.67        | 1.79        | 209  |
| Goomeri             | RR[1208] | 0.40        | 0.96        | 2.28        | 551  |
| Goomeribong         | RR[1209] | 0.26        | 0.83        | 2.40        | 34   |
| Goondi              | RR[1210] | 0.41        | 1.18        | 3.49        | 44   |
| Goondi Bend         | RR[1211] | 0.42        | 1.17        | 2.70        | 445  |
| Goondi Hill         | RR[1212] | 0.46        | 1.20        | 3.19        | 434  |
| Goondiwindi         | RR[1213] | 0.68        | 1.17        | 1.80        | 4931 |
| Goorganga Creek     | RR[1214] | 0.32        | 1.01        | 3.00        | 3    |
| Goorganga Plains    | RR[1215] | 0.35        | 0.99        | 2.95        | 0    |
| Gooroolba           | RR[1216] | 0.40        | 1.26        | 3.95        | 12   |
| Gootchie            | RR[1217] | 0.32        | 0.93        | 2.76        | 82   |
| Goovigen            | RR[1218] | 0.29        | 0.84        | 2.34        | 183  |
| Goowarra            | RR[1219] | 0.34        | 0.95        | 2.60        | 16   |
| Goranba             | RR[1220] | 0.28        | 0.76        | 2.30        | 157  |
| Gordon Park         | RR[1221] | 0.57        | 1.00        | 1.67        | 3488 |
| Gordonbrook         | RR[1222] | 0.31        | 0.81        | 2.29        | 139  |
| Gordonstone         | RR[1223] | 0.26        | 0.84        | 2.66        | 3    |
| Gordonvale          | RR[1224] | <b>1.26</b> | <b>1.88</b> | <b>2.61</b> | 5111 |
| Gore                | RR[1225] | 0.29        | 0.88        | 2.66        | 33   |
| Gowrie Junction     | RR[1226] | 0.25        | 0.58        | 1.31        | 1585 |
| Gowrie Little Plain | RR[1227] | 0.21        | 0.69        | 1.95        | 52   |
| Gowrie Mountain     | RR[1228] | 0.29        | 0.86        | 2.41        | 176  |
| Gowrie Station      | RR[1229] | 0.38        | 1.15        | 3.74        | 12   |
| Gracemere           | RR[1230] | 0.48        | 0.75        | 1.12        | 8262 |
| Graceville          | RR[1231] | 0.47        | 0.89        | 1.52        | 3585 |
| Grahams Creek       | RR[1232] | 0.25        | 0.78        | 2.16        | 136  |
| Granadilla          | RR[1233] | 0.38        | 1.07        | 3.28        | 62   |
| Grand Secret        | RR[1234] | 0.41        | 1.18        | 3.21        | 126  |
| Grandchester        | RR[1235] | 0.38        | 0.97        | 2.29        | 367  |
| Grange (Qld)        | RR[1236] | 0.74        | 1.22        | 2.01        | 3212 |
| Granite Vale        | RR[1237] | 0.33        | 0.95        | 2.72        | 0    |
| Grant               | RR[1238] | 0.41        | 1.19        | 3.96        | 11   |
| Grantham            | RR[1239] | 0.22        | 0.58        | 1.35        | 519  |
| Granville (Qld)     | RR[1240] | 0.74        | 1.43        | 2.48        | 2200 |
| Grapetree           | RR[1241] | 0.30        | 0.83        | 2.34        | 24   |
| Grassdale (Qld)     | RR[1242] | 0.26        | 0.78        | 2.15        | 4    |
| Grasstree Beach     | RR[1243] | 0.37        | 0.95        | 2.38        | 618  |
| Grays Gate          | RR[1244] | 0.27        | 0.85        | 2.46        | 28   |
| Great Sandy Strait  | RR[1245] | 0.26        | 0.94        | 3.11        | 4    |
| Green Hill          | RR[1246] | 0.37        | 1.11        | 3.11        | 139  |
| Green Island        | RR[1247] | 0.41        | 1.53        | 6.16        | 25   |
| Greenbank           | RR[1248] | 0.55        | 0.90        | 1.46        | 6061 |
| Greenlake           | RR[1249] | 0.34        | 0.98        | 2.88        | 0    |

|                                  |          |             |             |             |      |
|----------------------------------|----------|-------------|-------------|-------------|------|
| Greenlands (Qld)                 | RR[1250] | 0.35        | 1.04        | 2.82        | 205  |
| Greenmount (Mackay - Qld)        | RR[1251] | 0.24        | 0.63        | 1.67        | 379  |
| Greenmount (Toowoomba - Qld)     | RR[1252] | 0.42        | 1.10        | 2.48        | 550  |
| Greens Creek (Qld)               | RR[1253] | 0.22        | 0.64        | 1.72        | 271  |
| Greenslopes                      | RR[1254] | 0.58        | 0.90        | 1.36        | 7750 |
| Greenswamp                       | RR[1255] | 0.28        | 0.86        | 2.57        | 37   |
| Greenup                          | RR[1256] | 0.31        | 0.95        | 2.96        | 20   |
| Greenvale (Qld)                  | RR[1257] | 0.66        | 1.69        | 4.22        | 196  |
| Greenview                        | RR[1258] | 0.28        | 0.83        | 2.46        | 72   |
| Greenwood (Qld)                  | RR[1259] | 0.31        | 1.04        | 3.16        | 28   |
| Gregors Creek                    | RR[1260] | 0.30        | 0.81        | 2.32        | 65   |
| Gregory (Qld)                    | RR[1261] | 0.52        | 1.48        | 4.38        | 59   |
| Gregory River (Bundaberg - Qld)  | RR[1262] | 0.37        | 0.98        | 2.75        | 49   |
| Gregory River (Whitsunday - Qld) | RR[1263] | 0.28        | 0.79        | 2.12        | 248  |
| Greycliffe                       | RR[1264] | 0.31        | 0.89        | 2.67        | 15   |
| Greymare                         | RR[1265] | 0.27        | 0.85        | 2.50        | 51   |
| Griffin                          | RR[1266] | 0.19        | 0.38        | 0.71        | 4999 |
| Groganville                      | RR[1267] | 0.43        | 1.27        | 3.64        | 7    |
| Groomsville                      | RR[1268] | 0.26        | 0.75        | 1.98        | 86   |
| Groper Creek                     | RR[1269] | 0.48        | 1.52        | 4.52        | 62   |
| Grosmont                         | RR[1270] | 0.32        | 0.93        | 2.57        | 123  |
| Grosvenor                        | RR[1271] | 0.29        | 0.86        | 2.73        | 17   |
| Guanaba                          | RR[1272] | 0.38        | 0.95        | 2.13        | 676  |
| Guijar Islet                     | RR[1273] | 0.27        | 1.82        | 8.56        | 0    |
| Gulf Of Carpentaria              | RR[1274] | 0.28        | 1.33        | 7.09        | 0    |
| Gulliver                         | RR[1275] | <b>1.73</b> | <b>2.73</b> | <b>4.21</b> | 2279 |
| Gulngai                          | RR[1276] | 0.39        | 1.13        | 3.47        | 0    |
| Guluguba                         | RR[1277] | 0.32        | 0.92        | 2.49        | 92   |
| Gumdale                          | RR[1278] | 0.22        | 0.52        | 1.16        | 1575 |
| Gumlow                           | RR[1279] | 0.28        | 0.77        | 2.25        | 131  |
| Gumlu                            | RR[1280] | <b>1.19</b> | <b>3.19</b> | <b>7.79</b> | 164  |
| Gunalda                          | RR[1281] | 0.42        | 1.13        | 2.87        | 342  |
| Gundiah                          | RR[1282] | 0.39        | 1.18        | 3.44        | 103  |
| Gungaloon                        | RR[1283] | 0.32        | 0.91        | 2.62        | 26   |
| Gunnawarra                       | RR[1284] | 0.40        | 1.17        | 3.43        | 10   |
| Gunnewin                         | RR[1285] | 0.37        | 1.06        | 3.04        | 44   |
| Gunpowder                        | RR[1286] | 0.55        | 1.55        | 4.25        | 43   |
| Gunyarra                         | RR[1287] | 0.30        | 0.99        | 2.97        | 13   |
| Gurgeena                         | RR[1288] | 0.31        | 0.96        | 2.91        | 27   |
| Gurulumundi                      | RR[1289] | 0.30        | 0.90        | 2.75        | 7    |
| Guthalungra                      | RR[1290] | 0.35        | 1.07        | 3.15        | 86   |
| Gwambegwine                      | RR[1291] | 0.31        | 1.01        | 3.07        | 17   |
| Gympie                           | RR[1292] | <b>1.17</b> | <b>1.61</b> | <b>2.14</b> | 8718 |
| Habana                           | RR[1293] | 0.26        | 0.67        | 1.52        | 764  |
| Haden                            | RR[1294] | 0.43        | 1.21        | 3.71        | 153  |
| Haigslea                         | RR[1295] | 0.29        | 0.79        | 1.98        | 397  |
| Hail Creek                       | RR[1296] | 0.30        | 0.81        | 2.27        | 145  |
| Haliday Bay                      | RR[1297] | 0.22        | 0.78        | 2.64        | 147  |
| Halifax                          | RR[1298] | <b>1.36</b> | <b>3.09</b> | <b>6.22</b> | 412  |
| Halliford                        | RR[1299] | 0.31        | 0.82        | 2.51        | 0    |

|                                   |          |             |             |             |       |
|-----------------------------------|----------|-------------|-------------|-------------|-------|
| Haly Creek                        | RR[1300] | 0.30        | 0.85        | 2.25        | 107   |
| Hamilton (Qld)                    | RR[1301] | 0.45        | 0.80        | 1.28        | 6251  |
| Hamilton Creek                    | RR[1302] | 0.37        | 1.06        | 3.18        | 86    |
| Hamilton Plains                   | RR[1303] | 0.29        | 0.93        | 2.69        | 67    |
| Hampden (Qld)                     | RR[1304] | 0.38        | 0.96        | 2.40        | 450   |
| Hampton (Qld)                     | RR[1305] | 0.63        | 1.57        | 3.93        | 294   |
| Hannaford                         | RR[1306] | 0.31        | 0.89        | 2.50        | 100   |
| Happy Valley (Qld)                | RR[1307] | 0.60        | 1.48        | 3.13        | 555   |
| Harlaxton                         | RR[1308] | 0.31        | 0.63        | 1.29        | 2090  |
| Harlin                            | RR[1309] | 0.46        | 1.25        | 3.16        | 132   |
| Harrami                           | RR[1310] | 0.29        | 0.85        | 2.44        | 36    |
| Harriet                           | RR[1311] | 0.30        | 0.90        | 2.97        | 4     |
| Harristown                        | RR[1312] | 0.69        | 1.06        | 1.54        | 7045  |
| Harrisville                       | RR[1313] | 0.24        | 0.66        | 1.78        | 484   |
| Hatton Vale                       | RR[1314] | 0.30        | 0.69        | 1.50        | 1165  |
| Hawkins Creek                     | RR[1315] | 0.46        | 1.19        | 3.07        | 170   |
| Hawkwood                          | RR[1316] | 0.29        | 0.93        | 2.58        | 27    |
| Hawthorne                         | RR[1317] | 0.70        | 1.20        | 1.94        | 3928  |
| Hay Point                         | RR[1318] | 0.22        | 0.60        | 1.57        | 1081  |
| Hazeldean                         | RR[1319] | 0.27        | 0.73        | 1.91        | 232   |
| Hazledean                         | RR[1320] | 0.27        | 0.85        | 2.48        | 16    |
| Headington Hill                   | RR[1321] | 0.28        | 0.77        | 2.29        | 55    |
| Healy                             | RR[1322] | 0.44        | 0.95        | 1.99        | 1378  |
| Heathwood                         | RR[1323] | 0.15        | 0.35        | 0.78        | 2078  |
| Heatley                           | RR[1324] | 0.89        | 1.46        | 2.42        | 3240  |
| Hebel                             | RR[1325] | 0.38        | 1.31        | 4.25        | 63    |
| Helens Hill                       | RR[1326] | 0.39        | 1.12        | 3.28        | 104   |
| Helensvale                        | RR[1327] | 0.56        | 0.80        | 1.08        | 13735 |
| Helidon                           | RR[1328] | 0.31        | 0.76        | 1.80        | 808   |
| Helidon Spa                       | RR[1329] | 0.29        | 0.75        | 1.87        | 431   |
| Hemmant                           | RR[1330] | 0.53        | 1.08        | 2.05        | 1874  |
| Hendon (Qld)                      | RR[1331] | 0.28        | 0.75        | 2.16        | 159   |
| Hendra                            | RR[1332] | <b>1.01</b> | <b>1.59</b> | <b>2.46</b> | 3736  |
| Herberton                         | RR[1333] | 0.46        | 1.12        | 2.36        | 696   |
| Heritage Park                     | RR[1334] | 0.14        | 0.32        | 0.64        | 3845  |
| Hermit Park                       | RR[1335] | <b>1.43</b> | <b>2.31</b> | <b>3.46</b> | 2760  |
| Herston                           | RR[1336] | 0.62        | 1.18        | 2.10        | 1963  |
| Hervey Range                      | RR[1337] | 0.30        | 0.83        | 2.13        | 227   |
| Hibernia                          | RR[1338] | 0.28        | 0.83        | 2.57        | 42    |
| Hidden Valley (Qld)               | RR[1339] | 0.27        | 0.80        | 1.96        | 336   |
| Hideaway Bay                      | RR[1340] | 0.23        | 0.76        | 2.66        | 183   |
| Highbury (Qld)                    | RR[1341] | 0.47        | 1.33        | 3.95        | 0     |
| Highfields (Qld)                  | RR[1342] | 0.25        | 0.49        | 0.85        | 6313  |
| Highgate Hill                     | RR[1343] | 0.80        | 1.24        | 1.85        | 5414  |
| Highgrove                         | RR[1344] | 0.28        | 0.82        | 2.37        | 19    |
| Highland Park                     | RR[1345] | 0.34        | 0.60        | 1.04        | 5338  |
| Highland Plains (Maranoa - Qld)   | RR[1346] | 0.37        | 1.13        | 3.33        | 2     |
| Highland Plains (Toowoomba - Qld) | RR[1347] | 0.28        | 0.78        | 2.32        | 32    |
| Highvale                          | RR[1348] | 0.47        | 0.99        | 2.02        | 1371  |
| Highworth                         | RR[1349] | 0.58        | 1.52        | 3.95        | 240   |

|                    |          |             |             |             |      |
|--------------------|----------|-------------|-------------|-------------|------|
| Hillcrest (Qld)    | RR[1350] | 0.24        | 0.47        | 0.92        | 4341 |
| Hillview           | RR[1351] | 0.25        | 0.77        | 2.33        | 58   |
| Hinchinbrook (Qld) | RR[1352] | 0.30        | 1.31        | 5.25        | 0    |
| Hirstglen          | RR[1353] | 0.24        | 0.70        | 1.95        | 73   |
| Hivesville         | RR[1354] | 0.34        | 1.03        | 2.78        | 149  |
| Hobartville (Qld)  | RR[1355] | 0.39        | 1.10        | 3.31        | 40   |
| Hodgleigh          | RR[1356] | 0.27        | 0.84        | 2.26        | 96   |
| Hodgson            | RR[1357] | 0.32        | 0.93        | 3.04        | 40   |
| Hodgson Vale       | RR[1358] | 0.18        | 0.48        | 1.10        | 1018 |
| Holland Park       | RR[1359] | <b>1.19</b> | <b>1.70</b> | <b>2.38</b> | 6328 |
| Holland Park West  | RR[1360] | 0.45        | 0.77        | 1.24        | 5251 |
| Holloways Beach    | RR[1361] | 0.83        | 1.60        | 2.82        | 1952 |
| Hollywell          | RR[1362] | 0.41        | 0.83        | 1.62        | 2400 |
| Holmview           | RR[1363] | 0.18        | 0.46        | 1.02        | 1733 |
| Holroyd River      | RR[1364] | 0.43        | 1.31        | 4.00        | 0    |
| Home Creek         | RR[1365] | 0.43        | 1.24        | 3.64        | 20   |
| Home Hill          | RR[1366] | 0.91        | 1.63        | 2.66        | 2439 |
| Homebush (Qld)     | RR[1367] | 0.32        | 0.93        | 2.47        | 221  |
| Homestead          | RR[1368] | 0.48        | 1.54        | 4.96        | 41   |
| Hookwood           | RR[1369] | 0.32        | 0.90        | 2.28        | 48   |
| Hope Island        | RR[1370] | 0.59        | 0.89        | 1.27        | 9574 |
| Hope Vale          | RR[1371] | 0.29        | 0.79        | 1.88        | 736  |
| Hopeland (Qld)     | RR[1372] | 0.29        | 0.81        | 2.26        | 110  |
| Horn               | RR[1373] | 0.53        | 1.56        | 3.95        | 386  |
| Horse Camp         | RR[1374] | 0.35        | 0.90        | 2.46        | 335  |
| Horse Creek        | RR[1375] | 0.35        | 1.10        | 3.27        | 99   |
| Horseshoe Bay      | RR[1376] | 0.61        | 1.70        | 4.01        | 512  |
| Horseshoe Lagoon   | RR[1377] | 0.35        | 1.00        | 2.64        | 174  |
| Horton             | RR[1378] | 0.44        | 1.26        | 3.34        | 137  |
| Howard             | RR[1379] | <b>1.37</b> | <b>2.48</b> | <b>4.37</b> | 1176 |
| Howitt             | RR[1380] | 0.53        | 1.56        | 4.32        | 24   |
| Hoya               | RR[1381] | 0.23        | 0.68        | 1.92        | 189  |
| Hudson             | RR[1382] | 0.46        | 1.38        | 3.91        | 169  |
| Hughenden          | RR[1383] | 0.71        | 1.49        | 3.12        | 942  |
| Hull Heads         | RR[1384] | 0.33        | 1.02        | 3.03        | 101  |
| Humboldt           | RR[1385] | 0.30        | 0.96        | 2.69        | 10   |
| Humeburn           | RR[1386] | 0.40        | 1.15        | 3.25        | 22   |
| Humphery           | RR[1387] | 0.28        | 0.93        | 2.94        | 17   |
| Hunchy             | RR[1388] | 0.28        | 0.77        | 1.99        | 462  |
| Hungerford (Qld)   | RR[1389] | 0.36        | 1.13        | 3.48        | 20   |
| Hurricane          | RR[1390] | 0.45        | 1.30        | 3.64        | 17   |
| Hutton Creek       | RR[1391] | 0.37        | 1.09        | 3.09        | 20   |
| Hyde Park (Qld)    | RR[1392] | <b>1.54</b> | <b>2.87</b> | <b>4.96</b> | 1100 |
| Iama Island        | RR[1393] | 0.24        | 0.96        | 3.57        | 212  |
| Ibis               | RR[1394] | 0.47        | 1.30        | 3.81        | 4    |
| Idalia             | RR[1395] | 0.51        | 0.94        | 1.60        | 3372 |
| Ideraway           | RR[1396] | 0.31        | 0.89        | 2.66        | 28   |
| Ilbilbie           | RR[1397] | 0.44        | 1.26        | 3.39        | 297  |
| Ilfracombe         | RR[1398] | 0.69        | 1.74        | 4.23        | 206  |
| Ilkley             | RR[1399] | 0.21        | 0.54        | 1.33        | 629  |

|                               |          |             |             |             |       |
|-------------------------------|----------|-------------|-------------|-------------|-------|
| Illinbah                      | RR[1400] | 0.24        | 0.71        | 2.05        | 96    |
| Image Flat                    | RR[1401] | 0.32        | 0.87        | 2.22        | 357   |
| Imbil                         | RR[1402] | 0.44        | 1.06        | 2.33        | 756   |
| Inala                         | RR[1403] | 0.84        | 1.19        | 1.59        | 11333 |
| Indooroopilly                 | RR[1404] | 0.31        | 0.53        | 0.84        | 10466 |
| Ingberry                      | RR[1405] | 0.41        | 1.23        | 3.56        | 11    |
| Ingham                        | RR[1406] | <b>1.76</b> | <b>2.58</b> | <b>3.70</b> | 3722  |
| Inglestone                    | RR[1407] | 0.29        | 0.86        | 2.68        | 56    |
| Inglewood (Qld)               | RR[1408] | 0.38        | 0.92        | 2.17        | 794   |
| Ingoldsby                     | RR[1409] | 0.23        | 0.67        | 1.89        | 54    |
| Injinoo                       | RR[1410] | 0.24        | 0.74        | 2.19        | 319   |
| Injune                        | RR[1411] | <b>1.24</b> | <b>2.73</b> | <b>5.82</b> | 383   |
| Inkerman (Qld)                | RR[1412] | 0.36        | 1.09        | 2.98        | 120   |
| Innes Park                    | RR[1413] | 0.46        | 0.92        | 1.71        | 1758  |
| Innisfail                     | RR[1414] | <b>1.64</b> | <b>3.11</b> | <b>5.49</b> | 969   |
| Innisfail Estate              | RR[1415] | 0.45        | 1.08        | 2.41        | 1067  |
| Innisplain                    | RR[1416] | 0.35        | 0.99        | 2.57        | 75    |
| Innot Hot Springs             | RR[1417] | 0.38        | 1.01        | 2.57        | 151   |
| Inskip                        | RR[1418] | 0.18        | 0.80        | 3.73        | 45    |
| Inverlaw                      | RR[1419] | 0.36        | 0.99        | 2.60        | 170   |
| Inverness                     | RR[1420] | 0.38        | 0.98        | 2.43        | 369   |
| Ipswich                       | RR[1421] | <b>3.14</b> | <b>4.64</b> | <b>6.61</b> | 2104  |
| Iredale                       | RR[1422] | 0.22        | 0.68        | 1.73        | 115   |
| Iron Range                    | RR[1423] | 0.51        | 1.66        | 6.37        | 14    |
| Ironbark (Qld)                | RR[1424] | 0.29        | 0.72        | 1.76        | 542   |
| Irongate                      | RR[1425] | 0.26        | 0.72        | 1.98        | 89    |
| Ironpot (Livingstone - Qld)   | RR[1426] | 0.34        | 0.90        | 2.54        | 133   |
| Ironpot (South Burnett - Qld) | RR[1427] | 0.30        | 0.84        | 2.65        | 36    |
| Irvinebank                    | RR[1428] | 0.49        | 1.39        | 3.44        | 110   |
| Irvingdale                    | RR[1429] | 0.26        | 0.75        | 2.12        | 147   |
| Isis Central                  | RR[1430] | 0.40        | 1.15        | 3.00        | 170   |
| Isis River                    | RR[1431] | 0.34        | 0.97        | 2.75        | 101   |
| Isisford                      | RR[1432] | 0.42        | 1.13        | 3.09        | 180   |
| Isla                          | RR[1433] | 0.29        | 0.91        | 2.55        | 128   |
| Island Plantation             | RR[1434] | 0.27        | 0.84        | 2.57        | 123   |
| Iveragh                       | RR[1435] | 0.24        | 0.72        | 2.15        | 104   |
| Ivory Creek                   | RR[1436] | 0.30        | 0.83        | 2.57        | 40    |
| Jackson                       | RR[1437] | 0.28        | 0.92        | 2.78        | 54    |
| Jackson North                 | RR[1438] | 0.30        | 0.90        | 2.84        | 43    |
| Jackson South                 | RR[1439] | 0.31        | 0.94        | 2.69        | 10    |
| Jacobs Well                   | RR[1440] | 0.50        | 1.08        | 2.20        | 1521  |
| Jaffa                         | RR[1441] | 0.38        | 1.17        | 3.34        | 18    |
| Jaggan                        | RR[1442] | 0.36        | 1.02        | 2.83        | 164   |
| Jamboree Heights              | RR[1443] | 0.20        | 0.44        | 0.88        | 2469  |
| Jandowae                      | RR[1444] | 0.34        | 0.85        | 1.96        | 891   |
| Japoonvale                    | RR[1445] | 0.49        | 1.40        | 3.48        | 128   |
| Jardine                       | RR[1446] | 0.32        | 0.91        | 2.84        | 42    |
| Jardine River                 | RR[1447] | 0.30        | 0.94        | 3.06        | 0     |
| Jarra Creek                   | RR[1448] | 0.53        | 1.44        | 3.76        | 95    |
| Jarvisfield                   | RR[1449] | 0.43        | 1.14        | 3.00        | 281   |

|                      |          |             |             |             |       |
|----------------------|----------|-------------|-------------|-------------|-------|
| Jeebropilly          | RR[1450] | 0.24        | 0.68        | 2.07        | 4     |
| Jellinbah            | RR[1451] | 0.30        | 0.93        | 2.66        | 23    |
| Jensen               | RR[1452] | 0.33        | 0.75        | 1.64        | 1130  |
| Jericho (Qld)        | RR[1453] | 0.35        | 1.08        | 3.02        | 83    |
| Jerona               | RR[1454] | 0.37        | 1.14        | 3.19        | 40    |
| Jimboomba            | RR[1455] | 0.30        | 0.50        | 0.76        | 9919  |
| Jimbour East         | RR[1456] | 0.25        | 0.74        | 2.14        | 154   |
| Jimbour West         | RR[1457] | 0.26        | 0.83        | 2.54        | 38    |
| Jimna                | RR[1458] | 0.28        | 0.75        | 2.03        | 75    |
| Jindalee (Qld)       | RR[1459] | 0.52        | 0.94        | 1.56        | 4255  |
| Jinghi               | RR[1460] | 0.31        | 0.81        | 2.30        | 56    |
| Jobs Gate            | RR[1461] | 0.34        | 1.05        | 3.57        | 6     |
| Johnsons Hill        | RR[1462] | 0.41        | 1.20        | 3.93        | 7     |
| Johnstown            | RR[1463] | 0.28        | 0.84        | 2.46        | 27    |
| Jollys Lookout       | RR[1464] | 0.23        | 0.71        | 2.00        | 63    |
| Jondaryan            | RR[1465] | 0.25        | 0.68        | 1.70        | 296   |
| Jones Gully          | RR[1466] | 0.29        | 0.81        | 2.51        | 7     |
| Jones Hill           | RR[1467] | 0.26        | 0.67        | 1.55        | 689   |
| Josephville          | RR[1468] | 0.21        | 0.65        | 1.87        | 138   |
| Joskeleigh           | RR[1469] | 0.37        | 1.05        | 2.83        | 51    |
| Joyner               | RR[1470] | 0.33        | 0.69        | 1.37        | 2171  |
| Jubilee Heights      | RR[1471] | 0.39        | 1.11        | 3.09        | 112   |
| Jubilee Pocket       | RR[1472] | 0.41        | 0.92        | 1.85        | 1418  |
| Julago               | RR[1473] | 0.35        | 1.02        | 2.98        | 91    |
| Julatten             | RR[1474] | 0.38        | 0.89        | 1.90        | 916   |
| Julia Creek          | RR[1475] | <b>1.35</b> | <b>3.07</b> | <b>6.24</b> | 415   |
| Junabee              | RR[1476] | 0.25        | 0.68        | 1.80        | 169   |
| Junction View        | RR[1477] | 0.26        | 0.68        | 2.09        | 35    |
| Jundah               | RR[1478] | 0.41        | 1.19        | 3.39        | 93    |
| Kaban                | RR[1479] | 0.37        | 1.06        | 3.11        | 73    |
| Kabra                | RR[1480] | 0.53        | 1.34        | 3.39        | 337   |
| Kagaru               | RR[1481] | 0.22        | 0.64        | 1.85        | 10    |
| Kaimkillenbun        | RR[1482] | 0.27        | 0.73        | 1.94        | 233   |
| Kairabah             | RR[1483] | 0.20        | 0.64        | 2.04        | 0     |
| Kairi                | RR[1484] | 0.34        | 0.91        | 2.50        | 352   |
| Kalapa               | RR[1485] | 0.34        | 1.00        | 2.84        | 80    |
| Kalbar               | RR[1486] | 0.66        | 1.46        | 2.93        | 858   |
| Kalinga              | RR[1487] | 0.57        | 1.16        | 2.16        | 1627  |
| Kalkadoon            | RR[1488] | 0.44        | 1.67        | 5.30        | 23    |
| Kalkie               | RR[1489] | 0.46        | 0.97        | 1.75        | 2109  |
| Kallangur            | RR[1490] | 0.56        | 0.80        | 1.10        | 15913 |
| Kalpowar             | RR[1491] | 0.30        | 0.79        | 2.26        | 57    |
| Kalunga              | RR[1492] | 0.46        | 1.32        | 3.88        | 81    |
| Kamerunga            | RR[1493] | 0.42        | 1.01        | 2.24        | 834   |
| Kandanga             | RR[1494] | 0.35        | 0.96        | 2.34        | 527   |
| Kandanga Creek       | RR[1495] | 0.27        | 0.78        | 2.15        | 95    |
| Kangaroo Point (Qld) | RR[1496] | 0.90        | 1.33        | 1.87        | 7624  |
| Kanigan              | RR[1497] | 0.31        | 0.89        | 2.67        | 101   |
| Kanimbla (Qld)       | RR[1498] | 0.40        | 0.81        | 1.54        | 2037  |
| Kapaldo              | RR[1499] | 0.26        | 0.80        | 2.50        | 36    |

|                   |          |             |             |             |      |
|-------------------|----------|-------------|-------------|-------------|------|
| Karalee           | RR[1500] | 0.25        | 0.53        | 1.06        | 3311 |
| Karana Downs      | RR[1501] | 0.43        | 0.85        | 1.58        | 2971 |
| Karara            | RR[1502] | 0.27        | 0.82        | 2.25        | 103  |
| Karawatha         | RR[1503] | 0.29        | 0.75        | 2.15        | 16   |
| Karrabin          | RR[1504] | 0.23        | 0.66        | 1.74        | 351  |
| Karragarra Island | RR[1505] | 0.42        | 1.60        | 5.50        | 187  |
| Karron            | RR[1506] | 0.53        | 1.56        | 4.93        | 0    |
| Karumba           | RR[1507] | 0.79        | 1.91        | 4.32        | 474  |
| Kawana            | RR[1508] | 0.39        | 0.77        | 1.40        | 3519 |
| Kawl Kawl         | RR[1509] | 0.29        | 0.88        | 2.66        | 13   |
| Kawungan          | RR[1510] | 0.75        | 1.23        | 1.97        | 4000 |
| Kearneys Spring   | RR[1511] | 0.50        | 0.81        | 1.24        | 6949 |
| Kedron            | RR[1512] | 0.95        | 1.37        | 1.92        | 7535 |
| Kelsey Creek      | RR[1513] | 0.32        | 0.89        | 2.68        | 100  |
| Kelso (Qld)       | RR[1514] | 0.33        | 0.56        | 0.90        | 7907 |
| Kelvin Grove      | RR[1515] | 0.47        | 0.78        | 1.22        | 6917 |
| Kelvinhaugh       | RR[1516] | 0.26        | 0.78        | 2.20        | 37   |
| Kemmis            | RR[1517] | 0.28        | 0.82        | 2.56        | 3    |
| Kenilworth        | RR[1518] | 0.52        | 1.18        | 2.72        | 495  |
| Kenmore           | RR[1519] | 0.71        | 1.09        | 1.58        | 7088 |
| Kenmore Hills     | RR[1520] | 0.43        | 0.94        | 1.71        | 1996 |
| Kennedy           | RR[1521] | 0.36        | 1.07        | 3.04        | 127  |
| Kensington (Qld)  | RR[1522] | 0.51        | 1.19        | 2.83        | 486  |
| Kensington Grove  | RR[1523] | 0.21        | 0.54        | 1.23        | 1309 |
| Kents Lagoon      | RR[1524] | 0.23        | 0.70        | 2.16        | 37   |
| Kents Pocket      | RR[1525] | 0.25        | 0.78        | 2.32        | 18   |
| Kentville         | RR[1526] | 0.26        | 0.74        | 2.20        | 85   |
| Keperra           | RR[1527] | 0.48        | 0.80        | 1.36        | 5452 |
| Kepnock           | RR[1528] | 0.78        | 1.33        | 2.07        | 3603 |
| Keppel Sands      | RR[1529] | <b>1.07</b> | <b>2.57</b> | <b>6.03</b> | 320  |
| Keriri Island     | RR[1530] | 0.16        | 0.80        | 3.33        | 171  |
| Kerry             | RR[1531] | 0.25        | 0.67        | 1.68        | 261  |
| Kewarra Beach     | RR[1532] | 0.43        | 0.81        | 1.36        | 4461 |
| Keysland          | RR[1533] | 0.27        | 0.88        | 2.73        | 12   |
| Kholo             | RR[1534] | 0.26        | 0.67        | 1.75        | 318  |
| Khosh Bulduk      | RR[1535] | 0.26        | 0.78        | 2.32        | 45   |
| Kia Ora (Qld)     | RR[1536] | 0.27        | 0.78        | 2.27        | 159  |
| Kiamba            | RR[1537] | 0.34        | 0.94        | 2.59        | 156  |
| Kianga (Qld)      | RR[1538] | 0.29        | 0.86        | 2.45        | 173  |
| Kidaman Creek     | RR[1539] | 0.26        | 0.79        | 2.33        | 115  |
| Kiels Mountain    | RR[1540] | 0.21        | 0.59        | 1.63        | 522  |
| Kilbirnie         | RR[1541] | 0.24        | 0.78        | 2.31        | 51   |
| Kilcoy            | RR[1542] | 0.47        | 1.01        | 2.12        | 1504 |
| Kilcummin         | RR[1543] | 0.28        | 0.79        | 2.20        | 185  |
| Kilkivan          | RR[1544] | 0.30        | 0.80        | 1.92        | 587  |
| Killaloe          | RR[1545] | 0.34        | 1.00        | 3.13        | 92   |
| Killarney (Qld)   | RR[1546] | 0.29        | 0.78        | 1.84        | 805  |
| Kilmorey Falls    | RR[1547] | 0.39        | 1.08        | 3.24        | 0    |
| Kimberley (Qld)   | RR[1548] | 0.39        | 1.29        | 5.09        | 30   |
| Kin Kin           | RR[1549] | 0.35        | 0.86        | 2.00        | 621  |



|                 |          |      |      |      |       |
|-----------------|----------|------|------|------|-------|
| Kin Kora        | RR[1550] | 0.22 | 0.53 | 1.10 | 2042  |
| Kinbombi        | RR[1551] | 0.28 | 0.82 | 2.43 | 27    |
| Kinchant Dam    | RR[1552] | 0.25 | 0.79 | 2.40 | 92    |
| Kincora         | RR[1553] | 0.27 | 0.81 | 2.35 | 38    |
| Kindon          | RR[1554] | 0.27 | 0.88 | 2.55 | 19    |
| King Scrub      | RR[1555] | 0.22 | 0.57 | 1.50 | 269   |
| Kingaham        | RR[1556] | 0.29 | 0.81 | 2.18 | 10    |
| Kingaroy        | RR[1557] | 0.75 | 1.10 | 1.60 | 7855  |
| Kings Beach     | RR[1558] | 0.49 | 0.98 | 1.89 | 2504  |
| Kings Creek     | RR[1559] | 0.26 | 0.78 | 2.24 | 56    |
| Kings Siding    | RR[1560] | 0.24 | 0.74 | 2.30 | 16    |
| Kingsholme      | RR[1561] | 0.21 | 0.59 | 1.52 | 212   |
| Kingsthorpe     | RR[1562] | 0.34 | 0.74 | 1.50 | 1454  |
| Kingston (Qld)  | RR[1563] | 0.72 | 1.09 | 1.56 | 8007  |
| Kinka Beach     | RR[1564] | 0.58 | 1.46 | 3.19 | 570   |
| Kinkuna         | RR[1565] | 0.35 | 0.99 | 2.62 | 91    |
| Kinleymore      | RR[1566] | 0.32 | 0.85 | 2.43 | 77    |
| Kinnoul         | RR[1567] | 0.33 | 0.97 | 2.83 | 55    |
| Kioma           | RR[1568] | 0.28 | 0.88 | 2.61 | 27    |
| Kippa-Ring      | RR[1569] | 0.47 | 0.77 | 1.18 | 7907  |
| Kirknie         | RR[1570] | 0.38 | 1.07 | 2.97 | 50    |
| Kirkwood        | RR[1571] | 0.17 | 0.43 | 1.03 | 1504  |
| Kirrama         | RR[1572] | 0.41 | 1.21 | 3.43 | 4     |
| Kirwan          | RR[1573] | 0.33 | 0.50 | 0.72 | 16721 |
| Kitoba          | RR[1574] | 0.28 | 0.89 | 2.56 | 10    |
| Kleinton        | RR[1575] | 0.16 | 0.44 | 1.04 | 1146  |
| Knapp Creek     | RR[1576] | 0.25 | 0.72 | 2.10 | 48    |
| Koah            | RR[1577] | 0.33 | 0.85 | 2.03 | 473   |
| Kobble Creek    | RR[1578] | 0.20 | 0.56 | 1.40 | 488   |
| Kogan           | RR[1579] | 0.30 | 0.77 | 2.09 | 146   |
| Kokotungo       | RR[1580] | 0.33 | 0.92 | 2.62 | 78    |
| Kolonga         | RR[1581] | 0.27 | 0.85 | 2.43 | 36    |
| Koombooloomba   | RR[1582] | 0.40 | 1.18 | 3.23 | 0     |
| Koongal         | RR[1583] | 0.56 | 1.04 | 1.78 | 3310  |
| Kooralbyn       | RR[1584] | 0.16 | 0.44 | 1.02 | 1406  |
| Kooralgin       | RR[1585] | 0.24 | 0.83 | 2.43 | 43    |
| Kooringal (Qld) | RR[1586] | 0.00 | 0.00 | 0.00 | 45    |
| Kooroomool      | RR[1587] | 0.43 | 1.17 | 3.44 | 0     |
| Kooroongarra    | RR[1588] | 0.29 | 0.84 | 2.41 | 51    |
| Koumala         | RR[1589] | 0.47 | 1.13 | 2.56 | 663   |
| Kowanyama       | RR[1590] | 0.64 | 1.51 | 3.26 | 690   |
| Kowguran        | RR[1591] | 0.31 | 0.91 | 2.78 | 34    |
| Kragra          | RR[1592] | 0.28 | 0.94 | 2.85 | 27    |
| Kulangoor       | RR[1593] | 0.22 | 0.66 | 1.72 | 413   |
| Kulgun          | RR[1594] | 0.23 | 0.71 | 2.14 | 53    |
| Kullogum        | RR[1595] | 0.37 | 1.00 | 2.88 | 90    |
| Kulpi           | RR[1596] | 0.27 | 0.76 | 2.19 | 68    |
| Kuluin          | RR[1597] | 0.49 | 0.99 | 1.85 | 1871  |
| Kumbarilla      | RR[1598] | 0.25 | 0.74 | 2.10 | 171   |
| Kumbia          | RR[1599] | 0.35 | 0.99 | 2.47 | 246   |

|                    |          |             |             |             |       |
|--------------------|----------|-------------|-------------|-------------|-------|
| Kunda Park         | RR[1600] | 0.23        | 0.73        | 2.03        | 27    |
| Kunioon            | RR[1601] | 0.31        | 0.85        | 2.61        | 19    |
| Kunwarara          | RR[1602] | 0.42        | 1.20        | 3.45        | 64    |
| Kuraby             | RR[1603] | 0.12        | 0.24        | 0.49        | 6149  |
| Kuranda            | RR[1604] | <b>1.25</b> | <b>2.10</b> | <b>3.33</b> | 2425  |
| Kureelpa           | RR[1605] | 0.23        | 0.59        | 1.46        | 766   |
| Kureen             | RR[1606] | 0.35        | 1.00        | 3.09        | 99    |
| Kuridala           | RR[1607] | 0.50        | 1.57        | 4.75        | 10    |
| Kurrimine Beach    | RR[1608] | 0.49        | 1.18        | 2.71        | 636   |
| Kurrowah           | RR[1609] | 0.27        | 0.81        | 2.36        | 25    |
| Kurumbul           | RR[1610] | 0.31        | 1.03        | 3.39        | 34    |
| Kurwongbah         | RR[1611] | 0.22        | 0.55        | 1.30        | 1148  |
| Kuttabul           | RR[1612] | 0.58        | 1.37        | 3.10        | 602   |
| Kybong             | RR[1613] | 0.29        | 0.79        | 2.05        | 297   |
| Kynuna             | RR[1614] | 0.50        | 1.52        | 4.28        | 42    |
| Kyoomba            | RR[1615] | 0.40        | 1.17        | 3.76        | 76    |
| Labrador           | RR[1616] | 0.71        | 0.97        | 1.29        | 15783 |
| Laceys Creek       | RR[1617] | 0.23        | 0.61        | 1.65        | 223   |
| Laglan             | RR[1618] | 0.39        | 1.06        | 3.05        | 3     |
| Lagoon Pocket      | RR[1619] | 0.22        | 0.67        | 2.04        | 98    |
| Laguna Quays       | RR[1620] | 0.32        | 1.04        | 3.79        | 65    |
| Laidley            | RR[1621] | 0.62        | 1.12        | 1.95        | 3064  |
| Laidley Creek West | RR[1622] | 0.22        | 0.65        | 1.79        | 123   |
| Laidley Heights    | RR[1623] | 0.20        | 0.48        | 1.15        | 1014  |
| Laidley North      | RR[1624] | 0.23        | 0.60        | 1.64        | 323   |
| Laidley South      | RR[1625] | 0.28        | 0.82        | 2.43        | 221   |
| Lake Barrine       | RR[1626] | 0.46        | 1.27        | 3.56        | 128   |
| Lake Borumba       | RR[1627] | 0.30        | 0.84        | 2.49        | 6     |
| Lake Clarendon     | RR[1628] | 0.24        | 0.64        | 1.57        | 254   |
| Lake Eacham        | RR[1629] | 0.37        | 0.90        | 2.34        | 364   |
| Lake Macdonald     | RR[1630] | 0.48        | 1.08        | 2.21        | 1081  |
| Lake Manchester    | RR[1631] | 0.27        | 0.78        | 2.12        | 16    |
| Lake Mary          | RR[1632] | 0.31        | 0.92        | 2.60        | 83    |
| Lake Monduran      | RR[1633] | 0.30        | 0.83        | 2.59        | 3     |
| Lake Proserpine    | RR[1634] | 0.36        | 1.01        | 2.75        | 6     |
| Lake Tinaroo       | RR[1635] | 0.37        | 1.10        | 3.28        | 0     |
| Lake Wivenhoe      | RR[1636] | 0.30        | 0.84        | 2.46        | 3     |
| Lakefield          | RR[1637] | 0.42        | 1.40        | 4.51        | 16    |
| Lakeland           | RR[1638] | 0.41        | 1.12        | 2.86        | 261   |
| Lakes Creek        | RR[1639] | 0.32        | 0.81        | 2.03        | 416   |
| Lakeside           | RR[1640] | 0.32        | 0.90        | 2.61        | 49    |
| Lamb Island        | RR[1641] | 0.47        | 1.39        | 3.78        | 382   |
| Lamb Range         | RR[1642] | 0.41        | 1.11        | 3.13        | 0     |
| Lamington (Qld)    | RR[1643] | 0.29        | 0.97        | 2.86        | 77    |
| Lammermoor         | RR[1644] | 0.42        | 0.91        | 1.86        | 1674  |
| Landers Shoot      | RR[1645] | 0.23        | 0.64        | 1.76        | 206   |
| Landsborough (Qld) | RR[1646] | 0.40        | 0.80        | 1.40        | 3114  |
| Lanefield          | RR[1647] | 0.25        | 0.68        | 1.95        | 86    |
| Langlands          | RR[1648] | 0.27        | 0.82        | 2.66        | 7     |
| Langlo             | RR[1649] | 0.36        | 1.14        | 3.54        | 43    |

|                                    |          |             |             |             |      |
|------------------------------------|----------|-------------|-------------|-------------|------|
| Langshaw                           | RR[1650] | 0.25        | 0.70        | 2.05        | 143  |
| Lannercost                         | RR[1651] | 0.42        | 1.16        | 3.11        | 95   |
| Lansdowne (Qld)                    | RR[1652] | 0.40        | 1.15        | 3.44        | 11   |
| Lanskey                            | RR[1653] | 0.66        | 2.01        | 6.02        | 60   |
| Larapinta (Qld)                    | RR[1654] | 0.19        | 0.59        | 1.76        | 0    |
| Laravale                           | RR[1655] | 0.23        | 0.68        | 1.94        | 155  |
| Lark Hill                          | RR[1656] | 0.25        | 0.75        | 2.20        | 49   |
| Laura (Qld)                        | RR[1657] | 0.47        | 1.16        | 3.07        | 181  |
| Lavelle                            | RR[1658] | 0.28        | 0.82        | 2.53        | 19   |
| Lawes                              | RR[1659] | 0.23        | 0.59        | 1.61        | 319  |
| Lawgi Dawes                        | RR[1660] | 0.26        | 0.77        | 2.36        | 114  |
| Lawn Hill                          | RR[1661] | 0.67        | 2.09        | 6.18        | 15   |
| Lawnton                            | RR[1662] | 1.00        | 1.57        | 2.32        | 4606 |
| Leafdale                           | RR[1663] | 0.28        | 0.85        | 2.47        | 22   |
| Lefthand Branch                    | RR[1664] | 0.23        | 0.69        | 1.94        | 72   |
| Leichhardt (Qld)                   | RR[1665] | 0.43        | 0.81        | 1.40        | 2905 |
| Lemontree                          | RR[1666] | 0.27        | 0.78        | 2.17        | 34   |
| Leslie                             | RR[1667] | 0.30        | 0.84        | 2.65        | 9    |
| Leslie Dam                         | RR[1668] | 0.28        | 0.75        | 2.05        | 120  |
| Lethebrook                         | RR[1669] | 0.31        | 0.99        | 3.34        | 47   |
| Leyburn                            | RR[1670] | 0.50        | 1.28        | 3.07        | 407  |
| Leydens Hill                       | RR[1671] | 0.44        | 1.23        | 3.68        | 3    |
| Lilydale (Qld)                     | RR[1672] | 0.22        | 0.68        | 2.02        | 62   |
| Lilyvale (Central Highlands - Qld) | RR[1673] | 0.24        | 0.77        | 2.21        | 30   |
| Lilyvale (Toowoomba - Qld)         | RR[1674] | 0.22        | 0.67        | 1.97        | 45   |
| Limestone (Qld)                    | RR[1675] | 0.39        | 1.21        | 3.45        | 7    |
| Limestone Creek                    | RR[1676] | 0.30        | 0.87        | 2.26        | 155  |
| Limestone Ridges                   | RR[1677] | 0.21        | 0.63        | 1.86        | 102  |
| Limevale                           | RR[1678] | 0.33        | 0.96        | 2.98        | 48   |
| Linden (Qld)                       | RR[1679] | 0.43        | 1.08        | 3.05        | 20   |
| Linthorpe                          | RR[1680] | 0.25        | 0.63        | 1.61        | 349  |
| Linville                           | RR[1681] | 0.27        | 0.76        | 2.13        | 138  |
| Little Mountain                    | RR[1682] | 0.44        | 0.71        | 1.09        | 8041 |
| Little Mulgrave                    | RR[1683] | 0.77        | 2.02        | 5.31        | 208  |
| Lizard                             | RR[1684] | 0.24        | 1.13        | 4.26        | 49   |
| Llanarth (Qld)                     | RR[1685] | 0.31        | 1.04        | 2.84        | 32   |
| Loch Lomond                        | RR[1686] | 0.22        | 0.72        | 2.11        | 90   |
| Lochington                         | RR[1687] | 0.34        | 0.96        | 2.60        | 36   |
| Lockhart River                     | RR[1688] | 0.87        | 2.16        | 4.74        | 499  |
| Lockrose                           | RR[1689] | 0.36        | 0.95        | 2.22        | 444  |
| Lockyer (Qld)                      | RR[1690] | 0.24        | 0.68        | 1.97        | 71   |
| Lockyer Waters                     | RR[1691] | 0.47        | 1.23        | 3.00        | 466  |
| Logan Central                      | RR[1692] | <b>1.07</b> | <b>1.64</b> | <b>2.43</b> | 4548 |
| Logan Reserve                      | RR[1693] | 0.20        | 0.46        | 0.98        | 2660 |
| Logan Village                      | RR[1694] | 0.47        | 0.86        | 1.43        | 3497 |
| Loganholme                         | RR[1695] | 0.42        | 0.74        | 1.21        | 4834 |
| Loganlea                           | RR[1696] | 0.25        | 0.48        | 0.80        | 5602 |
| Lonesome Creek                     | RR[1697] | 0.30        | 0.90        | 2.31        | 130  |
| Long Flat (Qld)                    | RR[1698] | 0.24        | 0.71        | 2.03        | 55   |
| Long Pocket                        | RR[1699] | 0.51        | 1.40        | 3.72        | 146  |

|                                     |          |             |             |             |      |
|-------------------------------------|----------|-------------|-------------|-------------|------|
| Longreach (Qld)                     | RR[1700] | <b>1.41</b> | <b>2.25</b> | <b>3.51</b> | 2400 |
| Lota                                | RR[1701] | 0.32        | 0.67        | 1.31        | 2584 |
| Lotus Creek                         | RR[1702] | 0.31        | 0.89        | 2.52        | 61   |
| Low Isles                           | RR[1703] | 0.41        | 1.65        | 6.54        | 0    |
| Lower Beechmont                     | RR[1704] | 0.25        | 0.64        | 1.50        | 863  |
| Lower Cowley                        | RR[1705] | 0.40        | 1.18        | 3.52        | 44   |
| Lower Cressbrook                    | RR[1706] | 0.28        | 0.90        | 2.59        | 13   |
| Lower Daintree                      | RR[1707] | 0.39        | 1.22        | 3.86        | 81   |
| Lower Mount Walker                  | RR[1708] | 0.23        | 0.64        | 1.81        | 149  |
| Lower Tenthill                      | RR[1709] | 0.23        | 0.62        | 1.77        | 209  |
| Lower Tully                         | RR[1710] | 0.38        | 1.09        | 3.32        | 59   |
| Lower Wonga                         | RR[1711] | 0.35        | 0.92        | 2.45        | 272  |
| Lowesby                             | RR[1712] | 0.33        | 0.98        | 3.02        | 7    |
| Lowestoff                           | RR[1713] | 0.25        | 0.78        | 2.51        | 29   |
| Lowmead                             | RR[1714] | 0.36        | 0.99        | 2.71        | 136  |
| Lowood                              | RR[1715] | 0.76        | 1.30        | 2.19        | 3131 |
| Lucinda                             | RR[1716] | 0.50        | 1.41        | 3.49        | 380  |
| Lumeah (Qld)                        | RR[1717] | 0.38        | 1.24        | 3.58        | 3    |
| Lumholtz                            | RR[1718] | 0.41        | 1.24        | 3.56        | 0    |
| Lundavra                            | RR[1719] | 0.29        | 0.85        | 2.40        | 76   |
| Luscombe                            | RR[1720] | 0.27        | 0.75        | 1.99        | 236  |
| Lutwyche                            | RR[1721] | <b>1.10</b> | <b>1.79</b> | <b>2.80</b> | 3035 |
| Lynam                               | RR[1722] | 0.29        | 0.95        | 2.69        | 7    |
| Lyndhurst (Qld)                     | RR[1723] | 0.45        | 1.34        | 3.69        | 8    |
| Lyndside                            | RR[1724] | 0.44        | 1.34        | 3.63        | 0    |
| Lyons (Qld)                         | RR[1725] | 0.22        | 0.62        | 1.75        | 26   |
| Lyra                                | RR[1726] | 0.28        | 1.00        | 3.20        | 40   |
| Lytton                              | RR[1727] | 0.35        | 1.04        | 3.29        | 6    |
| Ma Ma Creek                         | RR[1728] | 0.29        | 0.85        | 2.39        | 129  |
| Maadi                               | RR[1729] | 0.52        | 1.47        | 4.30        | 44   |
| Maalan                              | RR[1730] | 0.38        | 1.16        | 3.04        | 22   |
| Maaroom                             | RR[1731] | 0.34        | 1.03        | 2.91        | 215  |
| Mabuiag Island                      | RR[1732] | 0.28        | 1.17        | 4.26        | 128  |
| Macalister                          | RR[1733] | 0.31        | 0.78        | 2.25        | 119  |
| Macalister Range                    | RR[1734] | 0.41        | 1.05        | 2.93        | 0    |
| Macfarlane                          | RR[1735] | 0.36        | 1.19        | 3.43        | 14   |
| Macgregor (Qld)                     | RR[1736] | 0.33        | 0.61        | 1.03        | 5155 |
| Machans Beach                       | RR[1737] | <b>1.09</b> | <b>2.23</b> | <b>4.13</b> | 886  |
| Machine Creek                       | RR[1738] | 0.30        | 0.86        | 2.60        | 98   |
| Mackay                              | RR[1739] | <b>2.91</b> | <b>4.15</b> | <b>5.66</b> | 3121 |
| Mackay Harbour                      | RR[1740] | 0.20        | 0.64        | 1.72        | 495  |
| Mackenzie (Brisbane - Qld)          | RR[1741] | 0.17        | 0.42        | 0.96        | 1605 |
| Mackenzie (Central Highlands - Qld) | RR[1742] | 0.32        | 0.91        | 2.78        | 26   |
| Mackenzie River                     | RR[1743] | 0.30        | 0.86        | 2.25        | 54   |
| Macknade                            | RR[1744] | 0.76        | 2.01        | 5.09        | 191  |
| Maclagan                            | RR[1745] | 0.25        | 0.77        | 2.09        | 155  |
| Macleay Island                      | RR[1746] | <b>1.88</b> | <b>2.98</b> | <b>4.47</b> | 2410 |
| Magnolia                            | RR[1747] | 0.26        | 0.82        | 2.36        | 100  |
| Maidenhead                          | RR[1748] | 0.27        | 0.93        | 3.19        | 11   |
| Maidenwell                          | RR[1749] | 0.36        | 1.02        | 2.60        | 182  |

|                                 |          |             |             |             |       |
|---------------------------------|----------|-------------|-------------|-------------|-------|
| Main Beach                      | RR[1750] | 0.43        | 0.84        | 1.49        | 3588  |
| Majors Creek (Qld)              | RR[1751] | 0.35        | 0.92        | 2.41        | 274   |
| Malanda                         | RR[1752] | <b>1.33</b> | <b>2.32</b> | <b>3.78</b> | 1666  |
| Malarga                         | RR[1753] | 0.31        | 0.84        | 2.47        | 17    |
| Maleny                          | RR[1754] | 0.55        | 1.00        | 1.68        | 3239  |
| Malling                         | RR[1755] | 0.25        | 0.81        | 2.71        | 24    |
| Malmoe                          | RR[1756] | 0.30        | 0.87        | 2.81        | 30    |
| Malpas-Trenton                  | RR[1757] | 0.49        | 1.54        | 4.00        | 8     |
| Malu                            | RR[1758] | 0.25        | 0.80        | 2.57        | 15    |
| Mamu                            | RR[1759] | 0.41        | 1.14        | 3.24        | 0     |
| Manapouri                       | RR[1760] | 0.25        | 0.75        | 2.13        | 41    |
| Mandalay                        | RR[1761] | 0.23        | 0.73        | 1.98        | 277   |
| Maneroo                         | RR[1762] | 0.62        | 1.79        | 6.06        | 31    |
| Mango Hill                      | RR[1763] | 0.16        | 0.33        | 0.61        | 6148  |
| Manly (Qld)                     | RR[1764] | <b>1.34</b> | <b>2.06</b> | <b>3.10</b> | 3352  |
| Manly West                      | RR[1765] | 0.59        | 0.88        | 1.24        | 9499  |
| Mannuem                         | RR[1766] | 0.32        | 0.86        | 2.67        | 71    |
| Manoora (Qld)                   | RR[1767] | 0.89        | 1.40        | 2.06        | 4710  |
| Mansfield (Qld)                 | RR[1768] | 0.44        | 0.70        | 1.14        | 6916  |
| Mantuan Downs                   | RR[1769] | 0.35        | 0.99        | 2.83        | 28    |
| Manumbar                        | RR[1770] | 0.29        | 0.81        | 2.21        | 40    |
| Manunda                         | RR[1771] | <b>1.55</b> | <b>2.21</b> | <b>3.14</b> | 4408  |
| Manyung                         | RR[1772] | 0.28        | 0.78        | 2.50        | 55    |
| Mapleton                        | RR[1773] | 0.42        | 0.94        | 1.86        | 1380  |
| Mapoon                          | RR[1774] | 0.28        | 0.86        | 2.59        | 232   |
| Maramie                         | RR[1775] | 0.47        | 1.34        | 4.09        | 9     |
| Marburg                         | RR[1776] | 0.40        | 0.98        | 2.33        | 698   |
| Marcoola                        | RR[1777] | 0.29        | 0.60        | 1.23        | 2641  |
| Marcus Beach                    | RR[1778] | 0.37        | 0.89        | 2.22        | 631   |
| Mareeba                         | RR[1779] | <b>1.03</b> | <b>1.45</b> | <b>1.97</b> | 8932  |
| Margate (Qld)                   | RR[1780] | <b>1.03</b> | <b>1.57</b> | <b>2.28</b> | 6054  |
| Maria Creeks                    | RR[1781] | 0.38        | 1.05        | 3.11        | 96    |
| Marian                          | RR[1782] | 0.23        | 0.50        | 1.00        | 2793  |
| Marlborough                     | RR[1783] | 0.31        | 0.93        | 2.65        | 125   |
| Marmadua                        | RR[1784] | 0.33        | 0.84        | 2.43        | 6     |
| Marmor                          | RR[1785] | 0.31        | 0.90        | 2.49        | 171   |
| Marodian                        | RR[1786] | 0.31        | 0.91        | 2.56        | 0     |
| Maroochy River                  | RR[1787] | 0.23        | 0.57        | 1.29        | 1222  |
| Maroochydore                    | RR[1788] | 0.78        | 1.07        | 1.41        | 14990 |
| Maroon                          | RR[1789] | 0.23        | 0.68        | 1.92        | 130   |
| Maroondan                       | RR[1790] | 0.36        | 0.93        | 2.37        | 287   |
| Marsden                         | RR[1791] | 0.57        | 0.85        | 1.22        | 9995  |
| Marshlands                      | RR[1792] | 0.30        | 0.87        | 2.56        | 10    |
| Martyville                      | RR[1793] | 0.45        | 1.24        | 3.53        | 95    |
| Maryborough (Qld)               | RR[1794] | <b>1.13</b> | <b>1.50</b> | <b>1.97</b> | 12680 |
| Maryborough West                | RR[1795] | 0.32        | 0.84        | 2.03        | 462   |
| Marys Creek                     | RR[1796] | 0.24        | 0.75        | 2.22        | 58    |
| Maryvale (Livingstone - Qld)    | RR[1797] | 0.29        | 0.89        | 2.72        | 25    |
| Maryvale (Southern Downs - Qld) | RR[1798] | 0.23        | 0.65        | 1.71        | 258   |
| Masig Island                    | RR[1799] | 0.13        | 0.95        | 4.64        | 174   |

|                   |          |      |      |      |      |
|-------------------|----------|------|------|------|------|
| Massie            | RR[1800] | 0.28 | 0.78 | 2.15 | 82   |
| Maudsland         | RR[1801] | 0.21 | 0.44 | 0.82 | 3989 |
| Maxwelton         | RR[1802] | 0.50 | 1.45 | 4.15 | 19   |
| May Downs         | RR[1803] | 0.27 | 0.81 | 2.38 | 75   |
| McCutcheon        | RR[1804] | 0.38 | 1.17 | 3.70 | 19   |
| McDesme           | RR[1805] | 0.34 | 0.98 | 2.62 | 219  |
| McDowall          | RR[1806] | 0.39 | 0.70 | 1.12 | 5732 |
| McEwens Beach     | RR[1807] | 0.34 | 1.01 | 2.83 | 172  |
| McIlwraith        | RR[1808] | 0.27 | 0.77 | 2.15 | 155  |
| McIntosh Creek    | RR[1809] | 0.25 | 0.70 | 2.18 | 93   |
| McKinlay          | RR[1810] | 0.48 | 1.33 | 3.40 | 164  |
| Meadowbrook       | RR[1811] | 0.25 | 0.54 | 1.09 | 2483 |
| Meadowvale        | RR[1812] | 0.27 | 0.74 | 1.86 | 382  |
| Meandarra         | RR[1813] | 0.30 | 0.81 | 2.06 | 213  |
| Meikleville Hill  | RR[1814] | 0.31 | 0.98 | 2.75 | 390  |
| Melawondi         | RR[1815] | 0.27 | 0.78 | 2.51 | 23   |
| Meldale           | RR[1816] | 0.24 | 0.83 | 2.43 | 214  |
| Melrose (Qld)     | RR[1817] | 0.30 | 0.93 | 2.67 | 0    |
| Memerambi         | RR[1818] | 0.27 | 0.75 | 2.23 | 201  |
| Mena Creek        | RR[1819] | 0.39 | 1.05 | 2.75 | 194  |
| Mentmore          | RR[1820] | 0.35 | 1.05 | 3.37 | 0    |
| Menzies (Qld)     | RR[1821] | 0.87 | 1.94 | 3.80 | 780  |
| Mer Island        | RR[1822] | 0.30 | 1.55 | 5.02 | 318  |
| Meridan Plains    | RR[1823] | 0.19 | 0.42 | 0.83 | 2802 |
| Meringandan       | RR[1824] | 0.24 | 0.60 | 1.48 | 326  |
| Meringandan West  | RR[1825] | 0.22 | 0.50 | 1.09 | 1560 |
| Merlwood          | RR[1826] | 0.26 | 0.80 | 2.16 | 69   |
| Mermaid Beach     | RR[1827] | 0.65 | 1.08 | 1.62 | 5870 |
| Mermaid Waters    | RR[1828] | 0.99 | 1.39 | 1.82 | 9993 |
| Merrimac          | RR[1829] | 0.28 | 0.54 | 0.92 | 5742 |
| Merritts Creek    | RR[1830] | 0.26 | 0.73 | 2.08 | 65   |
| Merryburn         | RR[1831] | 0.33 | 1.01 | 2.88 | 142  |
| Merryvale         | RR[1832] | 0.21 | 0.65 | 2.35 | 16   |
| Mexico            | RR[1833] | 0.38 | 1.15 | 3.30 | 19   |
| Mia Mia (Qld)     | RR[1834] | 0.27 | 0.78 | 2.19 | 90   |
| Miallo            | RR[1835] | 0.51 | 1.35 | 3.11 | 301  |
| Miami             | RR[1836] | 0.90 | 1.37 | 2.01 | 5929 |
| Miara             | RR[1837] | 0.27 | 0.83 | 2.38 | 38   |
| Mica Creek        | RR[1838] | 0.44 | 1.26 | 3.52 | 150  |
| Middle Park (Qld) | RR[1839] | 0.28 | 0.57 | 1.08 | 3212 |
| Middle Ridge      | RR[1840] | 0.27 | 0.49 | 0.86 | 5614 |
| Middlebrook       | RR[1841] | 0.39 | 1.11 | 3.18 | 50   |
| Middlemount       | RR[1842] | 0.24 | 0.59 | 1.31 | 1334 |
| Middleton (Qld)   | RR[1843] | 0.53 | 1.45 | 4.13 | 6    |
| Midge Point       | RR[1844] | 0.78 | 2.00 | 4.48 | 379  |
| Midgee (Qld)      | RR[1845] | 0.42 | 1.10 | 2.92 | 41   |
| Midgenoo          | RR[1846] | 0.38 | 1.11 | 3.69 | 37   |
| Midgeree Bar      | RR[1847] | 0.41 | 1.18 | 3.56 | 39   |
| Mighell           | RR[1848] | 0.50 | 1.39 | 3.42 | 323  |
| Milbong           | RR[1849] | 0.22 | 0.62 | 1.75 | 128  |

|                  |          |             |             |             |      |
|------------------|----------|-------------|-------------|-------------|------|
| Miles            | RR[1850] | 0.72        | 1.46        | 2.80        | 1341 |
| Miles End        | RR[1851] | 0.78        | 2.09        | 5.27        | 194  |
| Milford          | RR[1852] | 0.31        | 0.88        | 2.41        | 165  |
| Millaa Millaa    | RR[1853] | 0.65        | 1.57        | 3.41        | 432  |
| Millaroo         | RR[1854] | 0.34        | 1.00        | 2.81        | 77   |
| Millbank (Qld)   | RR[1855] | 0.51        | 0.98        | 1.89        | 2107 |
| Millchester      | RR[1856] | 0.51        | 1.37        | 3.38        | 413  |
| Millmerran       | RR[1857] | 0.46        | 0.99        | 2.06        | 1249 |
| Millmerran Downs | RR[1858] | 0.26        | 0.77        | 2.37        | 86   |
| Millmerran Woods | RR[1859] | 0.25        | 0.80        | 2.32        | 82   |
| Millstream (Qld) | RR[1860] | 0.28        | 0.69        | 1.64        | 1012 |
| Millwood         | RR[1861] | 0.28        | 0.82        | 2.44        | 15   |
| Milman           | RR[1862] | 0.32        | 0.90        | 2.77        | 92   |
| Milora           | RR[1863] | 0.21        | 0.60        | 1.59        | 96   |
| Milton (Qld)     | RR[1864] | 0.52        | 1.08        | 2.01        | 2041 |
| Mimosa (Qld)     | RR[1865] | 0.32        | 0.91        | 2.63        | 26   |
| Min Min          | RR[1866] | 0.52        | 1.51        | 4.52        | 0    |
| Minbun           | RR[1867] | 0.36        | 1.05        | 3.05        | 55   |
| Minden           | RR[1868] | 0.31        | 0.76        | 1.70        | 921  |
| Minerva          | RR[1869] | 0.31        | 0.91        | 2.62        | 40   |
| Mingo            | RR[1870] | 0.30        | 0.89        | 2.68        | 8    |
| Mingoola (Qld)   | RR[1871] | 0.29        | 0.95        | 3.17        | 13   |
| Minnamoolka      | RR[1872] | 0.43        | 1.22        | 3.47        | 24   |
| Minnie Downs     | RR[1873] | 0.36        | 1.15        | 3.29        | 13   |
| Minyama          | RR[1874] | 0.39        | 0.82        | 1.58        | 2236 |
| Mirani           | RR[1875] | 0.45        | 0.98        | 2.03        | 1185 |
| Miriam Vale      | RR[1876] | 0.39        | 1.06        | 2.87        | 425  |
| Mirriwinni       | RR[1877] | 0.55        | 1.43        | 3.26        | 369  |
| Missen Flat      | RR[1878] | 0.26        | 0.81        | 2.36        | 14   |
| Mission Beach    | RR[1879] | 0.63        | 1.61        | 3.51        | 677  |
| Mission River    | RR[1880] | 0.50        | 1.23        | 2.76        | 695  |
| Mistake Creek    | RR[1881] | 0.36        | 1.00        | 3.02        | 26   |
| Mitchell (Qld)   | RR[1882] | <b>1.08</b> | <b>2.32</b> | <b>4.37</b> | 828  |
| Mitchelton       | RR[1883] | 0.59        | 0.92        | 1.39        | 6755 |
| Miva             | RR[1884] | 0.30        | 0.87        | 2.65        | 41   |
| Moa Island       | RR[1885] | 0.50        | 1.70        | 4.92        | 316  |
| Moffat Beach     | RR[1886] | 0.36        | 0.76        | 1.55        | 2131 |
| Moffatdale       | RR[1887] | 0.30        | 0.79        | 2.13        | 139  |
| Moggill          | RR[1888] | 0.31        | 0.61        | 1.09        | 3444 |
| Molangul         | RR[1889] | 0.28        | 0.84        | 2.34        | 10   |
| Molendinar       | RR[1890] | 0.34        | 0.64        | 1.11        | 5238 |
| Mon Repos        | RR[1891] | 0.28        | 1.02        | 3.38        | 30   |
| Mona Mona        | RR[1892] | 0.37        | 1.14        | 3.03        | 24   |
| Mona Park        | RR[1893] | 0.35        | 1.03        | 2.74        | 91   |
| Monal            | RR[1894] | 0.28        | 0.81        | 2.38        | 35   |
| Monduran         | RR[1895] | 0.29        | 0.81        | 2.06        | 77   |
| Mondure          | RR[1896] | 0.26        | 0.81        | 2.42        | 77   |
| Monkland         | RR[1897] | 0.32        | 0.77        | 1.69        | 897  |
| Monogorilby      | RR[1898] | 0.31        | 0.90        | 2.45        | 33   |
| Mons             | RR[1899] | 0.30        | 0.79        | 1.91        | 756  |

|                                 |          |             |             |             |       |
|---------------------------------|----------|-------------|-------------|-------------|-------|
| Monsildale                      | RR[1900] | 0.28        | 0.81        | 2.47        | 15    |
| Monto                           | RR[1901] | 0.58        | 1.27        | 2.57        | 995   |
| Montrose (Southern Downs - Qld) | RR[1902] | 0.29        | 0.84        | 2.38        | 0     |
| Montrose (Western Downs - Qld)  | RR[1903] | 0.32        | 0.86        | 2.61        | 53    |
| Montville                       | RR[1904] | 0.33        | 0.78        | 1.90        | 848   |
| Moodlu                          | RR[1905] | 0.22        | 0.65        | 1.78        | 266   |
| Mooga                           | RR[1906] | 0.33        | 0.98        | 3.07        | 17    |
| Moogerah                        | RR[1907] | 0.23        | 0.65        | 1.62        | 187   |
| Moola                           | RR[1908] | 0.27        | 0.76        | 2.11        | 101   |
| Moolboolaman                    | RR[1909] | 0.32        | 0.88        | 2.16        | 361   |
| Mooloo                          | RR[1910] | 0.23        | 0.72        | 2.03        | 121   |
| Mooloolaba                      | RR[1911] | 0.85        | 1.28        | 1.85        | 6815  |
| Mooloolah Valley                | RR[1912] | 0.18        | 0.40        | 0.83        | 2585  |
| Moombra                         | RR[1913] | 0.31        | 0.90        | 2.62        | 9     |
| Moombria                        | RR[1914] | 0.41        | 1.29        | 3.80        | 0     |
| Moomin                          | RR[1915] | 0.62        | 1.68        | 4.64        | 110   |
| Moondooner                      | RR[1916] | 0.26        | 0.82        | 2.38        | 49    |
| Moonford                        | RR[1917] | 0.25        | 0.80        | 2.25        | 124   |
| Moongan                         | RR[1918] | 0.35        | 1.12        | 3.19        | 101   |
| Moonie                          | RR[1919] | 0.29        | 0.81        | 2.22        | 140   |
| Moorang                         | RR[1920] | 0.22        | 0.69        | 1.97        | 40    |
| Moore                           | RR[1921] | 0.35        | 0.96        | 2.30        | 244   |
| Moore Park Beach                | RR[1922] | 0.50        | 0.97        | 1.81        | 2134  |
| Moores Pocket                   | RR[1923] | 0.39        | 1.08        | 2.49        | 640   |
| Moorina (Qld)                   | RR[1924] | 0.22        | 0.57        | 1.47        | 332   |
| Moorland (Qld)                  | RR[1925] | 0.25        | 0.76        | 1.98        | 236   |
| Mooroobool                      | RR[1926] | 0.68        | 1.09        | 1.67        | 5746  |
| Moorooka                        | RR[1927] | 0.98        | 1.44        | 1.95        | 8587  |
| Moraby                          | RR[1928] | 0.31        | 0.94        | 2.67        | 34    |
| Moranbah                        | RR[1929] | 0.21        | 0.42        | 0.73        | 6234  |
| Morayfield                      | RR[1930] | 0.32        | 0.49        | 0.73        | 16455 |
| Moregatta                       | RR[1931] | 0.37        | 1.12        | 3.17        | 9     |
| Morella                         | RR[1932] | 0.51        | 1.47        | 3.89        | 25    |
| Moresby (Qld)                   | RR[1933] | 0.87        | 2.30        | 5.78        | 114   |
| Moreton Bay                     | RR[1934] | 0.00        | 0.00        | 21.84       | 0     |
| Moreton Island                  | RR[1935] | 0.00        | 0.00        | 0.00        | 227   |
| Morgan Park                     | RR[1936] | 0.24        | 0.76        | 2.15        | 72    |
| Morganville                     | RR[1937] | 0.25        | 0.85        | 2.40        | 97    |
| Morinish                        | RR[1938] | 0.32        | 0.93        | 2.72        | 74    |
| Morinish South                  | RR[1939] | 0.35        | 1.03        | 2.99        | 5     |
| Morningside                     | RR[1940] | 0.63        | 0.96        | 1.34        | 8804  |
| Mornington (Qld)                | RR[1941] | 0.67        | 1.40        | 2.56        | 1393  |
| Morton Vale                     | RR[1942] | 0.31        | 0.91        | 2.65        | 124   |
| Morven (Qld)                    | RR[1943] | 0.34        | 1.00        | 2.62        | 174   |
| Morwincha                       | RR[1944] | 0.22        | 0.68        | 2.10        | 24    |
| Mosman Park (Qld)               | RR[1945] | 0.45        | 1.22        | 2.92        | 296   |
| Mosquito Creek                  | RR[1946] | 0.30        | 0.89        | 2.47        | 13    |
| Mossman                         | RR[1947] | <b>1.07</b> | <b>2.02</b> | <b>3.57</b> | 1553  |
| Mossman Gorge                   | RR[1948] | 0.71        | 1.89        | 4.85        | 193   |
| Mothar Mountain                 | RR[1949] | 0.23        | 0.61        | 1.57        | 448   |



|                                  |          |             |              |              |      |
|----------------------------------|----------|-------------|--------------|--------------|------|
| Motley                           | RR[1950] | 0.26        | 0.79         | 2.24         | 9    |
| Mount Abundance                  | RR[1951] | 0.33        | 0.90         | 2.71         | 146  |
| Mount Alford                     | RR[1952] | 0.22        | 0.61         | 1.68         | 231  |
| Mount Alma                       | RR[1953] | 0.31        | 0.88         | 2.41         | 38   |
| Mount Archer (Rockhampton - Qld) | RR[1954] | 0.53        | 1.52         | 4.44         | 81   |
| Mount Archer (Somerset - Qld)    | RR[1955] | 0.24        | 0.66         | 1.80         | 257  |
| Mount Barney                     | RR[1956] | 0.25        | 0.73         | 2.21         | 18   |
| Mount Beppo                      | RR[1957] | 0.34        | 0.98         | 2.74         | 182  |
| Mount Berryman                   | RR[1958] | 0.23        | 0.67         | 1.98         | 86   |
| Mount Bindango                   | RR[1959] | 0.36        | 1.00         | 3.07         | 22   |
| Mount Binga                      | RR[1960] | 0.28        | 0.82         | 2.24         | 51   |
| Mount Britton                    | RR[1961] | 0.29        | 0.86         | 2.40         | 9    |
| Mount Byron                      | RR[1962] | 0.25        | 0.75         | 2.13         | 18   |
| Mount Carbine                    | RR[1963] | 0.54        | 1.48         | 3.92         | 98   |
| Mount Chalmers                   | RR[1964] | 0.27        | 0.89         | 2.25         | 192  |
| Mount Charlton                   | RR[1965] | 0.53        | 1.47         | 3.63         | 134  |
| Mount Colliery                   | RR[1966] | 0.24        | 0.67         | 2.03         | 98   |
| Mount Coolon                     | RR[1967] | 0.35        | 0.94         | 2.67         | 54   |
| Mount Coolum                     | RR[1968] | 0.16        | 0.34         | 0.72         | 3433 |
| Mount Coot-tha                   | RR[1969] | 0.23        | 0.66         | 1.98         | 0    |
| Mount Cotton                     | RR[1970] | 0.28        | 0.54         | 0.96         | 4989 |
| Mount Crosby                     | RR[1971] | 0.46        | 1.03         | 2.13         | 1370 |
| Mount Darry                      | RR[1972] | 0.27        | 0.77         | 2.27         | 35   |
| Mount Debateable                 | RR[1973] | 0.29        | 0.89         | 2.90         | 46   |
| Mount Delaney                    | RR[1974] | 0.26        | 0.74         | 2.20         | 65   |
| Mount Edwards                    | RR[1975] | 0.24        | 0.67         | 1.89         | 55   |
| Mount Elliot (Qld)               | RR[1976] | 0.41        | 1.12         | 3.28         | 8    |
| Mount Emlyn                      | RR[1977] | 0.25        | 0.83         | 2.66         | 9    |
| Mount Enniskillen                | RR[1978] | 0.39        | 1.13         | 3.54         | 13   |
| Mount Forbes                     | RR[1979] | 0.21        | 0.59         | 1.69         | 198  |
| Mount Fox                        | RR[1980] | 0.52        | 1.46         | 4.10         | 71   |
| Mount French                     | RR[1981] | 0.26        | 0.72         | 2.07         | 80   |
| Mount Gardiner                   | RR[1982] | 0.33        | 0.92         | 2.65         | 28   |
| Mount Garnet                     | RR[1983] | 0.40        | 1.12         | 2.92         | 372  |
| Mount Gipps                      | RR[1984] | 0.23        | 0.78         | 2.65         | 7    |
| Mount Glorious                   | RR[1985] | 0.39        | 1.02         | 2.52         | 254  |
| Mount Gravatt                    | RR[1986] | 0.84        | 1.48         | 2.35         | 2793 |
| Mount Gravatt East               | RR[1987] | 0.52        | 0.80         | 1.14         | 9652 |
| Mount Hallen                     | RR[1988] | 0.36        | 0.90         | 2.37         | 366  |
| Mount Howe                       | RR[1989] | 0.36        | 1.13         | 3.24         | 3    |
| Mount Hutton (Qld)               | RR[1990] | 0.38        | 1.15         | 3.33         | 28   |
| Mount Irving                     | RR[1991] | 0.23        | 0.75         | 2.21         | 15   |
| Mount Isa                        | RR[1992] | <b>5.31</b> | <b>11.62</b> | <b>23.95</b> | 95   |
| Mount Isa City                   | RR[1993] | 0.59        | 1.77         | 4.78         | 81   |
| Mount Jukes                      | RR[1994] | 0.24        | 0.71         | 1.97         | 312  |
| Mount Julian                     | RR[1995] | 0.35        | 0.93         | 2.46         | 388  |
| Mount Kelly                      | RR[1996] | 0.39        | 1.15         | 2.94         | 228  |
| Mount Kilcoy                     | RR[1997] | 0.24        | 0.73         | 2.01         | 214  |
| Mount Kynoch                     | RR[1998] | 0.23        | 0.67         | 1.98         | 176  |
| Mount Larcom                     | RR[1999] | 0.75        | 1.93         | 4.71         | 282  |

|                                    |          |             |             |             |      |
|------------------------------------|----------|-------------|-------------|-------------|------|
| Mount Lawless                      | RR[2000] | 0.29        | 0.92        | 3.03        | 9    |
| Mount Lindesay (Qld)               | RR[2001] | 0.20        | 0.74        | 2.64        | 0    |
| Mount Lofty                        | RR[2002] | 0.53        | 0.98        | 1.68        | 3073 |
| Mount Louisa                       | RR[2003] | 0.34        | 0.61        | 0.99        | 6689 |
| Mount Low                          | RR[2004] | 0.31        | 0.64        | 1.17        | 3352 |
| Mount Luke                         | RR[2005] | 0.25        | 0.75        | 2.25        | 31   |
| Mount Macarthur                    | RR[2006] | 0.26        | 0.77        | 2.57        | 13   |
| Mount Mackay                       | RR[2007] | 0.36        | 1.11        | 3.48        | 0    |
| Mount Maria                        | RR[2008] | 0.24        | 0.75        | 2.24        | 163  |
| Mount Marlow                       | RR[2009] | 0.47        | 1.40        | 3.80        | 105  |
| Mount Marrow                       | RR[2010] | 0.24        | 0.69        | 1.80        | 142  |
| Mount Marshall                     | RR[2011] | 0.42        | 1.18        | 3.11        | 200  |
| Mount Martin                       | RR[2012] | 0.28        | 0.82        | 2.23        | 158  |
| Mount Mceuen                       | RR[2013] | 0.29        | 0.86        | 2.52        | 33   |
| Mount Mee                          | RR[2014] | 0.22        | 0.60        | 1.55        | 406  |
| Mount Mellum                       | RR[2015] | 0.28        | 0.75        | 2.03        | 380  |
| Mount Moffatt                      | RR[2016] | 0.38        | 1.09        | 3.24        | 0    |
| Mount Molar                        | RR[2017] | 0.26        | 0.79        | 2.29        | 92   |
| Mount Molloy                       | RR[2018] | 0.59        | 1.57        | 4.32        | 215  |
| Mount Morgan                       | RR[2019] | <b>1.81</b> | <b>3.03</b> | <b>4.73</b> | 1656 |
| Mount Moriah                       | RR[2020] | 0.25        | 0.76        | 2.25        | 10   |
| Mount Mort                         | RR[2021] | 0.22        | 0.65        | 1.85        | 82   |
| Mount Mulgrave                     | RR[2022] | 0.43        | 1.28        | 3.82        | 0    |
| Mount Mulligan                     | RR[2023] | 0.42        | 1.25        | 3.40        | 4    |
| Mount Murchison                    | RR[2024] | 0.27        | 0.81        | 2.43        | 112  |
| Mount Nathan                       | RR[2025] | 0.42        | 1.04        | 2.22        | 952  |
| Mount Nebo                         | RR[2026] | 0.23        | 0.65        | 1.53        | 359  |
| Mount Ommaney                      | RR[2027] | 0.34        | 0.75        | 1.52        | 2011 |
| Mount Ossa                         | RR[2028] | 0.30        | 0.85        | 2.48        | 178  |
| Mount Pelion                       | RR[2029] | 0.29        | 0.89        | 2.67        | 106  |
| Mount Perry                        | RR[2030] | 0.33        | 0.87        | 2.14        | 441  |
| Mount Peter                        | RR[2031] | 0.40        | 1.07        | 3.02        | 71   |
| Mount Pleasant (Mackay - Qld)      | RR[2032] | 0.42        | 0.81        | 1.43        | 3669 |
| Mount Pleasant (Moreton Bay - Qld) | RR[2033] | 0.23        | 0.61        | 1.52        | 261  |
| Mount Pluto                        | RR[2034] | 0.29        | 1.00        | 3.03        | 3    |
| Mount Rascal                       | RR[2035] | 0.22        | 0.58        | 1.59        | 318  |
| Mount Rooper                       | RR[2036] | 0.21        | 0.79        | 2.62        | 0    |
| Mount Samson                       | RR[2037] | 0.27        | 0.68        | 1.64        | 455  |
| Mount Sheridan (Qld)               | RR[2038] | 0.40        | 0.69        | 1.15        | 6327 |
| Mount St John                      | RR[2039] | 0.35        | 1.00        | 2.90        | 62   |
| Mount Stanley                      | RR[2040] | 0.27        | 0.86        | 2.31        | 4    |
| Mount Steadman                     | RR[2041] | 0.31        | 0.93        | 2.86        | 8    |
| Mount Stuart (Qld)                 | RR[2042] | 0.33        | 0.91        | 2.56        | 0    |
| Mount Sturt                        | RR[2043] | 0.23        | 0.72        | 2.25        | 13   |
| Mount Surprise                     | RR[2044] | 0.54        | 1.47        | 3.59        | 146  |
| Mount Surround                     | RR[2045] | 0.39        | 1.08        | 2.77        | 132  |
| Mount Sylvia                       | RR[2046] | 0.25        | 0.67        | 1.85        | 81   |
| Mount Tabor                        | RR[2047] | 0.27        | 0.72        | 2.07        | 60   |
| Mount Tarampa                      | RR[2048] | 0.24        | 0.68        | 1.69        | 365  |
| Mount Tom                          | RR[2049] | 0.27        | 0.83        | 2.52        | 39   |

|                      |          |      |      |      |       |
|----------------------|----------|------|------|------|-------|
| Mount Tully          | RR[2050] | 0.29 | 0.84 | 2.51 | 99    |
| Mount Tyson          | RR[2051] | 0.28 | 0.84 | 2.13 | 222   |
| Mount Urah           | RR[2052] | 0.33 | 0.93 | 2.69 | 21    |
| Mount Walker (Qld)   | RR[2053] | 0.23 | 0.62 | 1.78 | 104   |
| Mount Walker West    | RR[2054] | 0.23 | 0.68 | 2.13 | 19    |
| Mount Warren Park    | RR[2055] | 0.53 | 0.90 | 1.44 | 4582  |
| Mount Whitestone     | RR[2056] | 0.30 | 0.82 | 2.26 | 111   |
| Mount Wyatt          | RR[2057] | 0.36 | 1.02 | 2.73 | 44    |
| Mountain Camp        | RR[2058] | 0.27 | 0.82 | 2.63 | 18    |
| Mountain Creek (Qld) | RR[2059] | 0.40 | 0.64 | 1.00 | 8579  |
| Moura                | RR[2060] | 0.63 | 1.33 | 2.48 | 1378  |
| Mourilyan            | RR[2061] | 0.82 | 2.06 | 4.40 | 455   |
| Mourilyan Harbour    | RR[2062] | 0.39 | 1.18 | 3.33 | 125   |
| Mowbray (Qld)        | RR[2063] | 0.35 | 0.96 | 2.57 | 261   |
| Mowbullán            | RR[2064] | 0.21 | 0.85 | 3.14 | 11    |
| Moy Pocket           | RR[2065] | 0.28 | 0.77 | 2.19 | 83    |
| Mp Creek             | RR[2066] | 0.31 | 0.86 | 2.44 | 24    |
| Muckadilla           | RR[2067] | 0.30 | 0.99 | 3.17 | 47    |
| Mudgeeraba           | RR[2068] | 0.37 | 0.58 | 0.91 | 10478 |
| Mudjimba             | RR[2069] | 0.31 | 0.70 | 1.33 | 2042  |
| Mudlo                | RR[2070] | 0.31 | 0.86 | 2.68 | 2     |
| Muirlea              | RR[2071] | 0.28 | 0.80 | 2.15 | 153   |
| Mulambin             | RR[2072] | 0.30 | 0.85 | 2.00 | 680   |
| Mulara               | RR[2073] | 0.57 | 1.56 | 4.41 | 73    |
| Muldu                | RR[2074] | 0.26 | 0.80 | 2.59 | 0     |
| Mulgildie            | RR[2075] | 0.26 | 0.77 | 2.04 | 138   |
| Mulgowie             | RR[2076] | 0.23 | 0.70 | 1.80 | 142   |
| Mulgrave (Qld)       | RR[2077] | 0.37 | 1.10 | 3.00 | 14    |
| Mullett Creek        | RR[2078] | 0.27 | 0.80 | 2.53 | 71    |
| Munbilla             | RR[2079] | 0.23 | 0.67 | 1.86 | 75    |
| Munbura              | RR[2080] | 0.26 | 0.83 | 2.45 | 101   |
| Munderra             | RR[2081] | 0.45 | 1.21 | 3.50 | 0     |
| Mundingburra         | RR[2082] | 0.94 | 1.55 | 2.42 | 3017  |
| Mundoo               | RR[2083] | 0.56 | 1.53 | 3.94 | 177   |
| Mundoolun            | RR[2084] | 0.43 | 0.95 | 1.95 | 1153  |
| Mundowran            | RR[2085] | 0.31 | 0.90 | 2.44 | 99    |
| Mundubbera           | RR[2086] | 0.68 | 1.53 | 2.88 | 1035  |
| Mungabunda           | RR[2087] | 0.33 | 0.94 | 2.76 | 53    |
| Mungallala           | RR[2088] | 0.33 | 0.96 | 2.97 | 106   |
| Mungallala South     | RR[2089] | 0.32 | 1.08 | 2.93 | 24    |
| Mungalli             | RR[2090] | 0.39 | 1.18 | 3.35 | 38    |
| Mungar               | RR[2091] | 0.39 | 1.21 | 3.09 | 248   |
| Mungindi (Qld)       | RR[2092] | 0.27 | 0.86 | 2.50 | 108   |
| Mungungo             | RR[2093] | 0.24 | 0.79 | 2.37 | 57    |
| Mungy                | RR[2094] | 0.30 | 0.88 | 2.63 | 3     |
| Muniganeen           | RR[2095] | 0.25 | 0.69 | 2.20 | 42    |
| Munna Creek          | RR[2096] | 0.30 | 0.97 | 2.79 | 23    |
| Munro Plains         | RR[2097] | 0.42 | 1.16 | 3.17 | 60    |
| Munruben             | RR[2098] | 0.24 | 0.58 | 1.10 | 2311  |
| Murrarie             | RR[2099] | 0.30 | 0.59 | 1.08 | 3442  |

|                     |          |             |             |             |       |
|---------------------|----------|-------------|-------------|-------------|-------|
| Murgon              | RR[2100] | 0.44        | 0.91        | 1.74        | 1903  |
| Murphys Creek (Qld) | RR[2101] | 0.23        | 0.59        | 1.52        | 485   |
| Murray              | RR[2102] | 0.20        | 0.51        | 1.12        | 1491  |
| Murray Upper        | RR[2103] | 0.59        | 1.54        | 3.82        | 207   |
| Murrays Bridge      | RR[2104] | 0.33        | 0.97        | 2.63        | 81    |
| Murrigal            | RR[2105] | 0.36        | 1.08        | 3.43        | 61    |
| Murrumba            | RR[2106] | 0.28        | 0.89        | 2.63        | 12    |
| Murrumba Downs      | RR[2107] | 0.42        | 0.69        | 1.08        | 8286  |
| Murweh              | RR[2108] | 0.37        | 1.13        | 3.99        | 0     |
| Mutarnee            | RR[2109] | 0.32        | 1.06        | 2.91        | 101   |
| Mutchilba           | RR[2110] | 0.58        | 1.36        | 3.22        | 394   |
| Mutdapilly          | RR[2111] | 0.20        | 0.58        | 1.63        | 254   |
| Muttaburra          | RR[2112] | 0.61        | 1.70        | 4.69        | 75    |
| Myall Park (Qld)    | RR[2113] | 0.28        | 0.93        | 2.82        | 14    |
| Myrtlevale          | RR[2114] | 0.25        | 0.81        | 2.53        | 125   |
| Mysterton           | RR[2115] | 0.46        | 1.13        | 2.43        | 660   |
| Nahrunda            | RR[2116] | 0.23        | 0.68        | 1.97        | 152   |
| Nambour             | RR[2117] | <b>1.12</b> | <b>1.57</b> | <b>2.10</b> | 9098  |
| Nanango             | RR[2118] | <b>1.38</b> | <b>2.15</b> | <b>3.26</b> | 2958  |
| Nandi               | RR[2119] | 0.23        | 0.76        | 2.18        | 80    |
| Nandowrie           | RR[2120] | 0.35        | 1.00        | 3.14        | 31    |
| Nangram             | RR[2121] | 0.33        | 0.92        | 2.71        | 8     |
| Nangwee             | RR[2122] | 0.25        | 0.74        | 2.14        | 38    |
| Nankin              | RR[2123] | 0.33        | 0.96        | 2.72        | 134   |
| Nanum               | RR[2124] | 0.29        | 0.84        | 2.05        | 670   |
| Narangba            | RR[2125] | 0.26        | 0.41        | 0.63        | 13597 |
| Narbethong (Qld)    | RR[2126] | 0.41        | 1.21        | 3.42        | 0     |
| Narko               | RR[2127] | 0.26        | 0.84        | 2.48        | 18    |
| Nathan              | RR[2128] | 0.22        | 0.52        | 1.24        | 1059  |
| Natural Bridge      | RR[2129] | 0.22        | 0.67        | 2.05        | 92    |
| Nearum              | RR[2130] | 0.30        | 0.86        | 2.56        | 4     |
| Nebine              | RR[2131] | 0.38        | 1.07        | 3.14        | 19    |
| Nebo                | RR[2132] | 0.24        | 0.64        | 1.59        | 596   |
| Neerdie             | RR[2133] | 0.30        | 0.83        | 2.19        | 100   |
| Nelly Bay           | RR[2134] | <b>1.24</b> | <b>2.61</b> | <b>4.64</b> | 1040  |
| Nerada              | RR[2135] | 0.39        | 1.08        | 3.19        | 72    |
| Nerang              | RR[2136] | <b>1.06</b> | <b>1.40</b> | <b>1.83</b> | 13787 |
| Neranwood           | RR[2137] | 0.30        | 0.95        | 2.70        | 55    |
| Nerimbera           | RR[2138] | 0.33        | 0.85        | 2.23        | 249   |
| Netherby (Qld)      | RR[2139] | 0.32        | 0.94        | 2.96        | 35    |
| Netherdale          | RR[2140] | 0.28        | 0.84        | 2.55        | 77    |
| Neumgna             | RR[2141] | 0.30        | 0.87        | 2.50        | 2     |
| Neurum              | RR[2142] | 0.25        | 0.73        | 1.98        | 128   |
| Neusa Vale          | RR[2143] | 0.27        | 0.77        | 2.34        | 44    |
| Nevilton            | RR[2144] | 0.26        | 0.77        | 2.16        | 30    |
| New Auckland        | RR[2145] | 0.20        | 0.44        | 0.85        | 3841  |
| New Beith           | RR[2146] | 0.17        | 0.38        | 0.76        | 2965  |
| New Chum            | RR[2147] | 0.26        | 0.76        | 2.30        | 0     |
| New Farm            | RR[2148] | 0.83        | 1.15        | 1.52        | 11457 |
| New Harbourline     | RR[2149] | 0.40        | 1.13        | 2.98        | 162   |

|                                     |          |             |             |             |       |
|-------------------------------------|----------|-------------|-------------|-------------|-------|
| New Mapoon                          | RR[2150] | 0.20        | 0.73        | 2.47        | 249   |
| New Moonta                          | RR[2151] | 0.28        | 0.84        | 2.56        | 56    |
| Newell                              | RR[2152] | 0.67        | 1.69        | 3.85        | 283   |
| Newlands (Qld)                      | RR[2153] | 0.35        | 0.95        | 2.75        | 51    |
| Newmarket                           | RR[2154] | 0.65        | 1.10        | 1.77        | 4234  |
| Newport (Qld)                       | RR[2155] | 0.29        | 0.67        | 1.32        | 2520  |
| Newstead (Qld)                      | RR[2156] | 0.20        | 0.47        | 1.04        | 2101  |
| Newtown (Ipswich - Qld)             | RR[2157] | <b>4.12</b> | <b>6.30</b> | <b>8.95</b> | 1258  |
| Newtown (Toowoomba - Qld)           | RR[2158] | 0.10        | 0.23        | 0.44        | 7825  |
| Ngatjan                             | RR[2159] | 0.40        | 1.21        | 3.35        | 0     |
| Nicholson (Qld)                     | RR[2160] | 0.48        | 1.50        | 5.05        | 0     |
| Nikenbah                            | RR[2161] | 0.26        | 0.67        | 1.59        | 485   |
| Nindaroo                            | RR[2162] | 0.23        | 0.62        | 1.71        | 192   |
| Ninderry                            | RR[2163] | 0.31        | 0.80        | 1.81        | 878   |
| Nindooinbah                         | RR[2164] | 0.26        | 0.75        | 2.22        | 62    |
| Nine Mile (Qld)                     | RR[2165] | 0.37        | 0.99        | 2.81        | 57    |
| Nine Mile Creek                     | RR[2166] | 0.37        | 1.13        | 3.45        | 17    |
| Ningi                               | RR[2167] | 0.70        | 1.22        | 2.01        | 3625  |
| Nive                                | RR[2168] | 0.37        | 1.18        | 3.38        | 28    |
| No 4 Branch                         | RR[2169] | 0.42        | 1.15        | 3.15        | 51    |
| No 5 Branch                         | RR[2170] | 0.44        | 1.20        | 3.69        | 9     |
| No 6 Branch                         | RR[2171] | 0.45        | 1.20        | 3.62        | 44    |
| Noah                                | RR[2172] | 0.45        | 1.42        | 4.34        | 0     |
| Nobby                               | RR[2173] | 0.37        | 0.95        | 2.27        | 445   |
| Nockatunga                          | RR[2174] | 0.39        | 1.19        | 3.96        | 11    |
| Nome                                | RR[2175] | 0.50        | 1.20        | 2.54        | 888   |
| Noorama                             | RR[2176] | 0.35        | 1.07        | 3.38        | 21    |
| Noorindoo                           | RR[2177] | 0.32        | 0.93        | 2.87        | 46    |
| Noosa Heads                         | RR[2178] | 0.44        | 0.85        | 1.43        | 3920  |
| Noosa North Shore                   | RR[2179] | 0.28        | 0.78        | 2.03        | 156   |
| Noosaville                          | RR[2180] | 0.72        | 1.10        | 1.60        | 7042  |
| Norley                              | RR[2181] | 0.36        | 1.22        | 3.39        | 0     |
| Norman Gardens                      | RR[2182] | 0.24        | 0.43        | 0.75        | 7814  |
| Norman Park                         | RR[2183] | 0.58        | 0.98        | 1.62        | 5007  |
| Normanton                           | RR[2184] | <b>2.40</b> | <b>4.18</b> | <b>7.01</b> | 933   |
| North Aramara                       | RR[2185] | 0.33        | 0.95        | 2.84        | 28    |
| North Arm (Qld)                     | RR[2186] | 0.37        | 0.90        | 2.16        | 548   |
| North Booval                        | RR[2187] | 0.43        | 0.89        | 1.62        | 2384  |
| North Branch (Southern Downs - Qld) | RR[2188] | 0.21        | 0.69        | 2.32        | 44    |
| North Branch (Toowoomba - Qld)      | RR[2189] | 0.26        | 0.78        | 2.24        | 30    |
| North Bungunya                      | RR[2190] | 0.31        | 0.92        | 2.97        | 32    |
| North Deep Creek                    | RR[2191] | 0.44        | 1.11        | 2.53        | 325   |
| North Eton                          | RR[2192] | 0.33        | 0.96        | 2.56        | 152   |
| North Gregory                       | RR[2193] | 0.45        | 1.34        | 3.96        | 45    |
| North Ipswich                       | RR[2194] | 0.51        | 0.94        | 1.60        | 3592  |
| North Isis                          | RR[2195] | 0.48        | 1.28        | 2.83        | 476   |
| North Johnstone                     | RR[2196] | 0.37        | 1.08        | 3.02        | 70    |
| North Lakes                         | RR[2197] | 0.12        | 0.22        | 0.36        | 15725 |
| North Mackay                        | RR[2198] | <b>1.16</b> | <b>1.70</b> | <b>2.48</b> | 4943  |
| North Maclagan                      | RR[2199] | 0.23        | 0.84        | 2.74        | 5     |

|                         |          |             |             |             |       |
|-------------------------|----------|-------------|-------------|-------------|-------|
| North Maclean           | RR[2200] | 0.47        | 1.03        | 2.08        | 1262  |
| North Maleny            | RR[2201] | 0.22        | 0.57        | 1.49        | 556   |
| North Stradbroke Island | RR[2202] | 0.73        | 2.35        | 6.72        | 117   |
| North Talwood           | RR[2203] | 0.29        | 0.88        | 2.29        | 134   |
| North Tivoli            | RR[2204] | 0.30        | 0.88        | 2.41        | 67    |
| North Toowoomba         | RR[2205] | 0.70        | 1.29        | 2.29        | 2439  |
| North Ward              | RR[2206] | 0.88        | 1.41        | 2.15        | 4404  |
| Northgate (Qld)         | RR[2207] | 0.48        | 0.88        | 1.48        | 3811  |
| Northhead               | RR[2208] | 0.50        | 1.40        | 3.70        | 0     |
| Norville                | RR[2209] | <b>1.23</b> | <b>2.06</b> | <b>3.36</b> | 1988  |
| Norwell                 | RR[2210] | 0.22        | 0.63        | 1.78        | 166   |
| Norwin                  | RR[2211] | 0.25        | 0.76        | 2.27        | 64    |
| Nudgee                  | RR[2212] | 0.60        | 1.16        | 2.03        | 2872  |
| Nudgee Beach            | RR[2213] | 0.37        | 1.02        | 2.70        | 234   |
| Nukku                   | RR[2214] | 0.30        | 0.85        | 2.54        | 18    |
| Numinbah Valley         | RR[2215] | 0.23        | 0.63        | 1.76        | 206   |
| Nundah                  | RR[2216] | 0.49        | 0.74        | 1.08        | 10591 |
| Nundubbermere           | RR[2217] | 0.38        | 1.15        | 3.58        | 74    |
| Nutgrove                | RR[2218] | 0.29        | 0.84        | 2.42        | 25    |
| Nychum                  | RR[2219] | 0.44        | 1.23        | 3.77        | 0     |
| Oak Beach               | RR[2224] | 0.54        | 1.84        | 5.33        | 171   |
| Oak Valley              | RR[2225] | 0.63        | 1.50        | 3.57        | 387   |
| Oakdale (Qld)           | RR[2226] | 0.26        | 0.79        | 2.47        | 48    |
| Oakenden                | RR[2227] | 0.26        | 0.71        | 1.86        | 330   |
| Oakey                   | RR[2228] | 0.86        | 1.49        | 2.30        | 3695  |
| Oakey Creek             | RR[2229] | 0.36        | 1.11        | 3.39        | 3     |
| Oakhurst (Qld)          | RR[2230] | 0.24        | 0.63        | 1.46        | 1146  |
| Oakview                 | RR[2231] | 0.27        | 0.80        | 2.42        | 29    |
| Oakwood (Qld)           | RR[2232] | 0.51        | 1.29        | 3.06        | 297   |
| Oaky Creek              | RR[2233] | 0.24        | 0.75        | 2.18        | 70    |
| Oberina                 | RR[2234] | 0.33        | 0.94        | 3.03        | 9     |
| Obi Obi                 | RR[2235] | 0.35        | 0.98        | 2.62        | 162   |
| O'Bil Bil               | RR[2220] | 0.30        | 0.94        | 2.59        | 29    |
| O'Briens Hill           | RR[2221] | 0.42        | 1.20        | 3.61        | 10    |
| Obum Obum               | RR[2236] | 0.24        | 0.65        | 2.03        | 104   |
| Ocean View              | RR[2237] | 0.40        | 0.89        | 2.01        | 780   |
| O'Connell (Qld)         | RR[2222] | 0.22        | 0.63        | 1.61        | 237   |
| Ogmore                  | RR[2238] | 0.33        | 0.91        | 2.64        | 83    |
| Okeden                  | RR[2239] | 0.30        | 0.96        | 2.82        | 21    |
| Old Cooranga            | RR[2240] | 0.29        | 0.94        | 2.67        | 24    |
| Old Talgai              | RR[2241] | 0.29        | 0.87        | 2.50        | 26    |
| Oman Ama                | RR[2242] | 0.30        | 0.92        | 2.47        | 34    |
| One Mile (Qld)          | RR[2243] | 0.47        | 1.02        | 1.93        | 1609  |
| Oombabeer               | RR[2244] | 0.30        | 0.94        | 2.74        | 47    |
| Ooononba                | RR[2245] | 0.79        | 1.58        | 2.88        | 1419  |
| Ooralea                 | RR[2246] | 0.52        | 0.99        | 1.79        | 2693  |
| Opalton                 | RR[2247] | 0.49        | 1.39        | 3.92        | 58    |
| Orallo                  | RR[2248] | 0.38        | 1.04        | 3.02        | 22    |
| Orange Creek            | RR[2249] | 0.29        | 0.79        | 2.19        | 150   |
| Orange Hill             | RR[2250] | 0.28        | 0.88        | 2.64        | 155   |

|                  |          |             |             |             |       |
|------------------|----------|-------------|-------------|-------------|-------|
| O'Reilly         | RR[2223] | 0.26        | 0.78        | 2.53        | 0     |
| Orient           | RR[2251] | 0.42        | 1.21        | 3.56        | 0     |
| Orion            | RR[2252] | 0.31        | 0.89        | 2.56        | 61    |
| Ormeau           | RR[2253] | 0.22        | 0.38        | 0.63        | 10468 |
| Ormeau Hills     | RR[2254] | 0.16        | 0.38        | 0.82        | 2316  |
| Ormiston         | RR[2255] | 0.53        | 0.90        | 1.47        | 4808  |
| Osborne (Qld)    | RR[2256] | 0.35        | 0.94        | 2.74        | 205   |
| Ottaba           | RR[2257] | 0.28        | 0.83        | 2.52        | 48    |
| Owanyilla        | RR[2258] | 0.28        | 0.83        | 2.17        | 161   |
| Owens Creek      | RR[2259] | 0.27        | 0.84        | 2.42        | 118   |
| Oxenford         | RR[2260] | 0.45        | 0.72        | 1.09        | 9319  |
| Oxford           | RR[2261] | 0.31        | 0.86        | 2.42        | 33    |
| Oxley (Qld)      | RR[2262] | 0.63        | 1.00        | 1.50        | 6582  |
| Oyster Creek     | RR[2263] | 0.26        | 0.85        | 2.47        | 40    |
| Pacific Haven    | RR[2264] | 0.42        | 1.11        | 2.64        | 646   |
| Pacific Heights  | RR[2265] | 0.25        | 0.67        | 1.57        | 732   |
| Pacific Paradise | RR[2266] | 0.81        | 1.55        | 2.71        | 1752  |
| Pacific Pines    | RR[2267] | 0.33        | 0.55        | 0.81        | 12395 |
| Packers Camp     | RR[2268] | 0.35        | 1.13        | 3.36        | 72    |
| Paddington (Qld) | RR[2269] | 0.42        | 0.70        | 1.11        | 7203  |
| Paddys Green     | RR[2270] | 0.35        | 0.93        | 2.27        | 296   |
| Paget            | RR[2271] | 0.55        | 1.54        | 3.91        | 221   |
| Palen Creek      | RR[2272] | 0.24        | 0.66        | 1.86        | 258   |
| Palgrave         | RR[2273] | 0.28        | 0.84        | 2.61        | 17    |
| Pallara          | RR[2274] | 0.30        | 0.78        | 2.00        | 434   |
| Pallarenda       | RR[2275] | <b>1.20</b> | <b>2.61</b> | <b>5.38</b> | 634   |
| Palm Beach (Qld) | RR[2276] | 0.83        | 1.14        | 1.54        | 12186 |
| Palm Cove        | RR[2277] | 0.43        | 0.99        | 1.89        | 1799  |
| Palm Grove (Qld) | RR[2278] | 0.25        | 0.82        | 2.51        | 73    |
| Palm Island      | RR[2279] | 0.34        | 0.87        | 1.84        | 1674  |
| Palmer (Qld)     | RR[2280] | 0.44        | 1.31        | 4.15        | 0     |
| Palmerston (Qld) | RR[2281] | 0.43        | 1.15        | 3.56        | 3     |
| Palmtree         | RR[2282] | 0.27        | 0.77        | 2.25        | 60    |
| Palmview         | RR[2283] | 0.18        | 0.50        | 1.24        | 700   |
| Palmwoods (Qld)  | RR[2284] | 0.40        | 0.74        | 1.27        | 4494  |
| Palmyra (Qld)    | RR[2285] | 0.27        | 0.73        | 1.93        | 207   |
| Paluma           | RR[2286] | 0.38        | 1.03        | 2.68        | 56    |
| Pampas           | RR[2287] | 0.26        | 0.78        | 2.06        | 51    |
| Paradise Point   | RR[2288] | 0.64        | 1.05        | 1.63        | 5698  |
| Park Avenue      | RR[2289] | 0.99        | 1.55        | 2.34        | 4126  |
| Park Ridge       | RR[2290] | 0.40        | 0.81        | 1.57        | 2200  |
| Park Ridge South | RR[2291] | 0.25        | 0.60        | 1.30        | 1461  |
| Parkhurst        | RR[2292] | 0.32        | 0.67        | 1.32        | 1818  |
| Parkinson        | RR[2293] | 0.19        | 0.34        | 0.62        | 8383  |
| Parklands (Qld)  | RR[2294] | 0.25        | 0.73        | 1.90        | 177   |
| Parknook         | RR[2295] | 0.28        | 0.92        | 2.91        | 48    |
| Parkside (Qld)   | RR[2296] | 0.64        | 1.36        | 2.58        | 1204  |
| Parkwood (Qld)   | RR[2297] | 0.35        | 0.60        | 1.00        | 7171  |
| Parramatta Park  | RR[2298] | <b>1.04</b> | <b>1.72</b> | <b>2.65</b> | 3078  |
| Parrearra        | RR[2299] | 0.56        | 1.01        | 1.64        | 3812  |

|                      |          |             |             |             |      |
|----------------------|----------|-------------|-------------|-------------|------|
| Pasha                | RR[2300] | 0.31        | 0.89        | 2.67        | 39   |
| Passchendaele        | RR[2301] | 0.27        | 0.84        | 2.55        | 24   |
| Paterson (Qld)       | RR[2302] | 0.53        | 1.45        | 4.09        | 114  |
| Patrick              | RR[2303] | 0.41        | 1.21        | 3.71        | 26   |
| Patrick Estate       | RR[2304] | 0.26        | 0.77        | 2.19        | 164  |
| Pauls Pocket         | RR[2305] | 0.33        | 1.00        | 2.69        | 28   |
| Peachester           | RR[2306] | 0.25        | 0.61        | 1.36        | 1093 |
| Peacock Siding       | RR[2307] | 0.39        | 1.17        | 3.42        | 67   |
| Peak Crossing        | RR[2308] | 0.30        | 0.74        | 1.69        | 731  |
| Peak Vale            | RR[2309] | 0.33        | 0.95        | 2.70        | 28   |
| Pechey               | RR[2310] | 0.27        | 0.74        | 2.13        | 94   |
| Peel Island          | RR[2311] | 0.00        | 0.00        | 23.18       | 0    |
| Peeramon             | RR[2312] | 0.39        | 0.98        | 2.27        | 501  |
| Pelham (Qld)         | RR[2313] | 0.32        | 0.94        | 2.82        | 8    |
| Pelican (Qld)        | RR[2314] | 0.27        | 0.83        | 2.58        | 14   |
| Pelican Creek        | RR[2315] | 0.43        | 1.25        | 3.52        | 17   |
| Pelican Waters       | RR[2316] | 0.38        | 0.67        | 1.14        | 5278 |
| Pentland             | RR[2317] | 0.35        | 0.95        | 2.47        | 249  |
| Penwhaupell          | RR[2318] | 0.30        | 0.91        | 2.63        | 0    |
| Peranga              | RR[2319] | 0.36        | 1.04        | 2.94        | 66   |
| Peregian Beach       | RR[2320] | 0.29        | 0.60        | 1.12        | 3035 |
| Peregian Springs     | RR[2321] | 0.19        | 0.38        | 0.69        | 5148 |
| Perseverance         | RR[2322] | 0.26        | 0.79        | 2.50        | 51   |
| Perwillowen          | RR[2323] | 0.33        | 0.90        | 2.50        | 188  |
| Petford              | RR[2324] | 0.42        | 1.19        | 3.55        | 32   |
| Petrie               | RR[2325] | 0.75        | 1.14        | 1.72        | 6749 |
| Petrie Terrace       | RR[2326] | 0.30        | 0.80        | 1.80        | 1035 |
| Pheasant Creek (Qld) | RR[2327] | 0.35        | 0.91        | 2.89        | 35   |
| Philpott             | RR[2328] | 0.31        | 0.95        | 2.88        | 35   |
| Pialba               | RR[2329] | 0.76        | 1.30        | 2.18        | 3098 |
| Pickanjinnie         | RR[2330] | 0.32        | 0.89        | 2.46        | 33   |
| Picnic Bay           | RR[2331] | <b>1.60</b> | <b>4.19</b> | <b>9.67</b> | 253  |
| Pie Creek            | RR[2332] | 0.25        | 0.67        | 1.42        | 805  |
| Pierces Creek        | RR[2333] | 0.28        | 0.82        | 2.47        | 62   |
| Pikedale             | RR[2334] | 0.30        | 0.88        | 2.43        | 31   |
| Pikes Creek          | RR[2335] | 0.32        | 0.96        | 2.65        | 22   |
| Pile Gully           | RR[2336] | 0.31        | 0.94        | 2.66        | 3    |
| Pilerwa              | RR[2337] | 0.27        | 0.87        | 2.79        | 41   |
| Pilton               | RR[2338] | 0.26        | 0.73        | 2.23        | 74   |
| Pimlico (Qld)        | RR[2339] | <b>1.44</b> | <b>2.41</b> | <b>3.98</b> | 2060 |
| Pimpama              | RR[2340] | 0.24        | 0.45        | 0.78        | 6645 |
| Pimpimbudgee         | RR[2341] | 0.27        | 0.83        | 2.41        | 53   |
| Pin Gin Hill         | RR[2342] | 0.38        | 1.10        | 2.97        | 144  |
| Pinbarren            | RR[2343] | 0.22        | 0.65        | 1.69        | 299  |
| Pindi Pindi          | RR[2344] | 0.31        | 0.95        | 2.66        | 75   |
| Pine Creek (Qld)     | RR[2345] | 0.37        | 1.05        | 2.63        | 192  |
| Pine Hill (Qld)      | RR[2346] | 0.35        | 1.02        | 3.06        | 3    |
| Pine Hills           | RR[2347] | 0.33        | 0.94        | 3.22        | 0    |
| Pine Mountain (Qld)  | RR[2348] | 0.30        | 0.70        | 1.50        | 1289 |
| Pinelands (Qld)      | RR[2349] | 0.26        | 0.80        | 2.34        | 74   |



|                            |          |             |             |             |      |
|----------------------------|----------|-------------|-------------|-------------|------|
| Pinevale                   | RR[2350] | 0.30        | 0.81        | 2.43        | 43   |
| Pinjarra Hills             | RR[2351] | 0.21        | 0.56        | 1.44        | 533  |
| Pink Lily                  | RR[2352] | 0.43        | 1.18        | 2.94        | 196  |
| Pinkenba                   | RR[2353] | 0.70        | 1.92        | 4.52        | 341  |
| Pinnacle (Qld)             | RR[2354] | 0.28        | 0.79        | 2.35        | 173  |
| Pinnacles                  | RR[2355] | 0.31        | 0.87        | 2.45        | 74   |
| Pioneer (Qld)              | RR[2356] | 0.54        | 1.15        | 2.10        | 1514 |
| Pioneers Rest              | RR[2357] | 0.30        | 0.88        | 2.76        | 52   |
| Pirrinuan                  | RR[2358] | 0.26        | 0.78        | 2.22        | 146  |
| Pittsworth                 | RR[2359] | 0.78        | 1.41        | 2.36        | 2611 |
| Piturie                    | RR[2360] | 0.50        | 1.52        | 4.56        | 42   |
| Placid Hills               | RR[2361] | 0.25        | 0.66        | 1.67        | 669  |
| Plainby                    | RR[2362] | 0.28        | 0.82        | 2.35        | 33   |
| Plainland                  | RR[2363] | 0.22        | 0.55        | 1.22        | 1249 |
| Pleystowe                  | RR[2364] | 0.23        | 0.62        | 1.71        | 301  |
| Point Arkwright            | RR[2365] | 0.18        | 0.59        | 1.71        | 234  |
| Point Lookout              | RR[2366] | <b>1.15</b> | <b>3.09</b> | <b>6.29</b> | 635  |
| Point Vernon               | RR[2367] | 0.78        | 1.24        | 1.92        | 4702 |
| Pomona (Qld)               | RR[2368] | 0.27        | 0.62        | 1.29        | 2370 |
| Pony Hills                 | RR[2369] | 0.33        | 1.01        | 2.97        | 7    |
| Poona                      | RR[2370] | 0.28        | 0.85        | 2.34        | 459  |
| Porcupine                  | RR[2371] | 0.45        | 1.24        | 3.18        | 29   |
| Pormpuraaw                 | RR[2372] | 0.81        | 1.91        | 4.06        | 548  |
| Port Alma                  | RR[2373] | 0.35        | 1.08        | 3.08        | 0    |
| Port Curtis                | RR[2374] | 0.38        | 0.96        | 2.47        | 234  |
| Port Douglas               | RR[2375] | 0.25        | 0.55        | 1.07        | 3095 |
| Port Of Brisbane           | RR[2376] | 0.25        | 1.02        | 4.53        | 0    |
| Port Wine                  | RR[2377] | 0.34        | 1.01        | 3.05        | 24   |
| Portsmith                  | RR[2378] | 0.37        | 0.99        | 2.67        | 256  |
| Poruma Island              | RR[2379] | 0.19        | 0.97        | 4.28        | 122  |
| Postmans Ridge             | RR[2380] | 0.35        | 0.96        | 2.49        | 324  |
| Pozieres                   | RR[2381] | 0.25        | 0.83        | 2.32        | 137  |
| Prairie (Qld)              | RR[2382] | 0.42        | 1.21        | 3.25        | 115  |
| Pratten                    | RR[2383] | 0.38        | 0.97        | 2.72        | 171  |
| Prawle                     | RR[2384] | 0.32        | 0.89        | 2.51        | 25   |
| Prenzlau                   | RR[2385] | 0.26        | 0.75        | 2.04        | 354  |
| Preston (Toowoomba - Qld)  | RR[2386] | 0.27        | 0.70        | 1.70        | 448  |
| Preston (Whitsunday - Qld) | RR[2387] | 0.29        | 0.79        | 2.32        | 233  |
| Priestdale                 | RR[2388] | 0.24        | 0.67        | 1.77        | 117  |
| Prince Henry Heights       | RR[2389] | 0.22        | 0.60        | 1.66        | 466  |
| Prince Of Wales            | RR[2390] | 0.20        | 0.89        | 4.13        | 91   |
| Promisedland               | RR[2391] | 0.32        | 0.92        | 2.85        | 20   |
| Proserpine                 | RR[2392] | 0.81        | 1.42        | 2.33        | 2865 |
| Prospect (Qld)             | RR[2393] | 0.27        | 0.75        | 1.96        | 207  |
| Proston                    | RR[2394] | 0.44        | 1.16        | 3.06        | 326  |
| Pullenvale                 | RR[2395] | 0.43        | 0.83        | 1.53        | 2441 |
| Punchs Creek               | RR[2396] | 0.28        | 0.84        | 2.29        | 27   |
| Punsand                    | RR[2397] | 0.26        | 1.23        | 4.50        | 17   |
| Purga                      | RR[2398] | 0.28        | 0.71        | 1.68        | 472  |
| Purrawunda                 | RR[2399] | 0.24        | 0.74        | 2.33        | 6    |

|                                |          |             |             |             |       |
|--------------------------------|----------|-------------|-------------|-------------|-------|
| Queenton                       | RR[2400] | 0.59        | 1.36        | 2.79        | 983   |
| Quilpie                        | RR[2401] | 0.96        | 2.17        | 4.79        | 467   |
| Quinalow                       | RR[2402] | 0.26        | 0.77        | 2.17        | 120   |
| Qunaba                         | RR[2403] | 0.34        | 0.89        | 2.11        | 659   |
| Racecourse                     | RR[2404] | 0.29        | 0.85        | 2.51        | 137   |
| Raceview                       | RR[2405] | 0.41        | 0.68        | 1.09        | 7340  |
| Radford                        | RR[2406] | 0.21        | 0.65        | 1.99        | 41    |
| Raglan (Qld)                   | RR[2407] | 0.30        | 0.92        | 2.36        | 120   |
| Railway Estate                 | RR[2408] | 0.90        | 1.63        | 2.74        | 2388  |
| Rainbow Beach                  | RR[2409] | 0.31        | 0.90        | 2.20        | 1074  |
| Ramsay (Qld)                   | RR[2410] | 0.22        | 0.59        | 1.58        | 272   |
| Rangemore (Burdekin - Qld)     | RR[2411] | 0.35        | 1.15        | 3.41        | 3     |
| Rangemore (Toowoomba - Qld)    | RR[2412] | 0.25        | 0.82        | 2.36        | 3     |
| Ranges Bridge                  | RR[2413] | 0.28        | 0.80        | 2.03        | 106   |
| Rangeville                     | RR[2414] | 0.58        | 0.91        | 1.39        | 6717  |
| Rangewood                      | RR[2415] | 0.41        | 0.96        | 2.15        | 901   |
| Ransome                        | RR[2416] | 0.24        | 0.62        | 1.71        | 296   |
| Rasmussen                      | RR[2417] | 0.93        | 1.54        | 2.43        | 3398  |
| Rathdowney                     | RR[2418] | 0.51        | 1.33        | 3.48        | 252   |
| Ravensbourne                   | RR[2419] | 0.27        | 0.74        | 1.91        | 216   |
| Ravenshoe                      | RR[2420] | <b>1.14</b> | <b>2.16</b> | <b>4.00</b> | 1148  |
| Ravenswood (Qld)               | RR[2421] | 0.44        | 1.17        | 2.92        | 220   |
| Ravensworth (Qld)              | RR[2422] | 0.47        | 1.30        | 3.80        | 0     |
| Rawbelle                       | RR[2423] | 0.31        | 0.83        | 2.33        | 46    |
| Red Hill (Brisbane - Qld)      | RR[2424] | 0.37        | 0.74        | 1.23        | 4734  |
| Red Hill (Western Downs - Qld) | RR[2425] | 0.28        | 0.84        | 2.49        | 46    |
| Red River                      | RR[2426] | 0.44        | 1.28        | 4.22        | 0     |
| Redbank (Qld)                  | RR[2427] | 0.43        | 0.97        | 2.01        | 1420  |
| Redbank Creek                  | RR[2428] | 0.28        | 0.79        | 2.27        | 118   |
| Redbank Plains                 | RR[2429] | 0.21        | 0.34        | 0.55        | 13640 |
| Redcliffe (Qld)                | RR[2430] | <b>1.29</b> | <b>1.77</b> | <b>2.33</b> | 8979  |
| Redford                        | RR[2431] | 0.40        | 1.13        | 3.00        | 7     |
| Redgate (Qld)                  | RR[2432] | 0.29        | 0.80        | 2.37        | 52    |
| Redhill Farms                  | RR[2433] | 0.26        | 0.84        | 2.58        | 29    |
| Redland Bay                    | RR[2434] | 0.48        | 0.75        | 1.08        | 11706 |
| Redlynch                       | RR[2435] | 0.51        | 0.83        | 1.29        | 7176  |
| Redridge                       | RR[2436] | 0.49        | 1.13        | 2.61        | 540   |
| Redwood                        | RR[2437] | 0.26        | 0.75        | 2.07        | 149   |
| Reedy Creek (Qld)              | RR[2438] | 0.19        | 0.39        | 0.73        | 4991  |
| Reesville                      | RR[2439] | 0.22        | 0.60        | 1.43        | 495   |
| Regency Downs                  | RR[2440] | 0.22        | 0.48        | 1.08        | 1754  |
| Regents Park (Qld)             | RR[2441] | 0.43        | 0.69        | 1.05        | 8358  |
| Reid River                     | RR[2442] | 0.33        | 0.99        | 2.81        | 103   |
| Reids Creek                    | RR[2443] | 0.30        | 0.89        | 2.67        | 51    |
| Retro                          | RR[2444] | 0.25        | 0.83        | 2.58        | 21    |
| Rewan                          | RR[2445] | 0.36        | 1.05        | 3.10        | 22    |
| Rhydding                       | RR[2446] | 0.32        | 0.95        | 2.84        | 43    |
| Richlands (Qld)                | RR[2447] | 0.13        | 0.32        | 0.69        | 2759  |
| Richmond (Mackay - Qld)        | RR[2448] | 0.21        | 0.61        | 1.63        | 352   |
| Richmond (Richmond - Qld)      | RR[2449] | 0.53        | 1.39        | 3.28        | 524   |

|                             |          |             |             |              |       |
|-----------------------------|----------|-------------|-------------|--------------|-------|
| Richmond Hill (Qld)         | RR[2450] | 0.64        | 1.16        | 2.18         | 1939  |
| Ridgeland                   | RR[2451] | 0.31        | 0.91        | 2.56         | 137   |
| Ridgewood (Qld)             | RR[2452] | 0.33        | 0.92        | 2.37         | 247   |
| Rifle Range                 | RR[2453] | 0.26        | 0.75        | 2.21         | 136   |
| Ringtail Creek              | RR[2454] | 0.25        | 0.72        | 2.04         | 171   |
| Ringwood (Qld)              | RR[2455] | 0.25        | 0.71        | 2.15         | 55    |
| Riordanvale                 | RR[2456] | 0.33        | 0.96        | 2.56         | 247   |
| Ripley                      | RR[2457] | 0.24        | 0.58        | 1.28         | 1130  |
| Rita Island                 | RR[2458] | 0.47        | 1.39        | 3.89         | 127   |
| River Heads                 | RR[2459] | 0.20        | 0.58        | 1.29         | 1312  |
| River Ranch                 | RR[2460] | 0.29        | 0.82        | 2.40         | 292   |
| Riverhills                  | RR[2461] | 0.11        | 0.28        | 0.63         | 3138  |
| Riverleigh                  | RR[2462] | 0.40        | 1.17        | 3.38         | 53    |
| Riversleigh                 | RR[2463] | 0.37        | 1.13        | 3.20         | 9     |
| Riverton (Qld)              | RR[2464] | 0.26        | 0.92        | 3.17         | 10    |
| Riverview (Qld)             | RR[2465] | 0.36        | 0.75        | 1.48         | 2389  |
| Roadvale                    | RR[2466] | 0.24        | 0.62        | 1.60         | 232   |
| Robertson (Qld)             | RR[2467] | 0.27        | 0.54        | 0.98         | 4275  |
| Robina                      | RR[2468] | 0.57        | 0.80        | 1.06         | 19221 |
| Roche Creek                 | RR[2469] | 0.31        | 0.96        | 2.54         | 42    |
| Rochedale                   | RR[2470] | 0.28        | 0.63        | 1.23         | 2491  |
| Rochedale South             | RR[2471] | 0.65        | 0.94        | 1.31         | 12072 |
| Rockhampton City            | RR[2472] | <b>7.07</b> | <b>9.60</b> | <b>12.55</b> | 1717  |
| Rockingham (Qld)            | RR[2473] | 0.35        | 1.04        | 2.94         | 88    |
| Rocklea (Qld)               | RR[2474] | <b>1.67</b> | <b>2.91</b> | <b>4.77</b>  | 1341  |
| Rockmount                   | RR[2475] | 0.23        | 0.65        | 1.95         | 76    |
| Rocksberg                   | RR[2476] | 0.29        | 0.83        | 2.18         | 240   |
| Rockside                    | RR[2477] | 0.24        | 0.67        | 1.98         | 35    |
| Rockville                   | RR[2478] | 0.38        | 0.72        | 1.42         | 2636  |
| Rocky Creek (Qld)           | RR[2479] | 0.26        | 0.82        | 2.69         | 34    |
| Rocky Point (Douglas - Qld) | RR[2480] | 0.42        | 1.27        | 3.66         | 107   |
| Rocky Point (Weipa - Qld)   | RR[2481] | 0.43        | 1.03        | 2.13         | 1384  |
| Rockyview                   | RR[2482] | 0.32        | 0.78        | 1.70         | 1242  |
| Rodds Bay                   | RR[2483] | 0.35        | 1.06        | 3.37         | 127   |
| Rodgers Creek               | RR[2484] | 0.27        | 0.84        | 2.32         | 4     |
| Rolleston                   | RR[2485] | 0.52        | 1.37        | 3.54         | 237   |
| Rollingstone                | RR[2486] | 0.47        | 1.34        | 3.63         | 103   |
| Roma                        | RR[2487] | 0.79        | 1.27        | 1.93         | 5319  |
| Rookwood (Qld)              | RR[2488] | 0.42        | 1.26        | 3.51         | 0     |
| Ropeley                     | RR[2489] | 0.22        | 0.64        | 1.88         | 152   |
| Rosalie Plains              | RR[2490] | 0.27        | 0.76        | 2.35         | 35    |
| Rosedale (Qld)              | RR[2491] | 0.24        | 0.70        | 1.72         | 376   |
| Rosehill (Qld)              | RR[2492] | 0.44        | 1.26        | 3.70         | 103   |
| Rosella                     | RR[2493] | 0.27        | 0.83        | 2.42         | 67    |
| Rosemount                   | RR[2494] | 0.28        | 0.67        | 1.53         | 1319  |
| Roseneath                   | RR[2495] | 0.31        | 0.90        | 2.35         | 139   |
| Rosenthal Heights           | RR[2496] | 0.24        | 0.53        | 1.15         | 1735  |
| Rosevale (Qld)              | RR[2497] | 0.20        | 0.62        | 1.69         | 170   |
| Rosewood (Qld)              | RR[2498] | 0.67        | 1.30        | 2.18         | 2233  |
| Ross Creek (Qld)            | RR[2499] | 0.27        | 0.79        | 2.27         | 45    |

|                     |          |             |             |             |       |
|---------------------|----------|-------------|-------------|-------------|-------|
| Ross River          | RR[2500] | 0.36        | 0.99        | 2.97        | 0     |
| Rosslea             | RR[2501] | 0.61        | 1.22        | 2.31        | 1473  |
| Rossllyn            | RR[2502] | 0.33        | 0.93        | 2.33        | 476   |
| Rossmoya            | RR[2503] | 0.44        | 1.24        | 3.65        | 55    |
| Rossvale            | RR[2504] | 0.26        | 0.77        | 2.29        | 55    |
| Rossville           | RR[2505] | 0.53        | 1.54        | 4.18        | 170   |
| Rothwell            | RR[2506] | 0.55        | 0.92        | 1.45        | 5765  |
| Round Hill (Qld)    | RR[2507] | 0.34        | 1.00        | 2.85        | 115   |
| Roundstone          | RR[2508] | 0.37        | 0.96        | 2.64        | 24    |
| Rowes Bay           | RR[2509] | 0.61        | 1.56        | 3.39        | 510   |
| Royston             | RR[2510] | 0.32        | 0.87        | 2.38        | 276   |
| Rubyanna            | RR[2511] | 0.32        | 0.89        | 2.32        | 192   |
| Rules Beach         | RR[2512] | 0.28        | 0.82        | 2.41        | 65    |
| Runaway Bay         | RR[2513] | <b>1.49</b> | <b>2.01</b> | <b>2.64</b> | 7955  |
| Runcorn             | RR[2514] | 0.24        | 0.42        | 0.67        | 11863 |
| Rungoo              | RR[2515] | 0.43        | 1.41        | 4.21        | 12    |
| Running Creek (Qld) | RR[2516] | 0.27        | 0.72        | 2.33        | 115   |
| Runnymede (Qld)     | RR[2517] | 0.34        | 1.01        | 2.74        | 141   |
| Rural View          | RR[2518] | 0.19        | 0.41        | 0.81        | 3535  |
| Rush Creek          | RR[2519] | 0.29        | 0.78        | 2.21        | 131   |
| Russell Island      | RR[2520] | 0.85        | 1.64        | 2.80        | 2480  |
| Ryan (Qld)          | RR[2521] | 0.48        | 1.42        | 3.76        | 123   |
| Ryeford             | RR[2522] | 0.29        | 0.80        | 2.24        | 43    |
| Rywung              | RR[2523] | 0.26        | 0.89        | 2.58        | 24    |
| Sabine              | RR[2524] | 0.27        | 0.77        | 2.48        | 6     |
| Sadliers Crossing   | RR[2525] | 0.42        | 1.05        | 2.10        | 1089  |
| Saibai Island       | RR[2526] | 0.50        | 1.84        | 5.25        | 268   |
| Salisbury (Qld)     | RR[2527] | 0.67        | 1.12        | 1.81        | 5098  |
| Saltern Creek       | RR[2528] | 0.40        | 1.26        | 4.50        | 9     |
| Samford Valley      | RR[2529] | 0.27        | 0.58        | 1.11        | 2425  |
| Samford Village     | RR[2530] | 0.29        | 0.84        | 2.31        | 619   |
| Samsonvale          | RR[2531] | 0.22        | 0.58        | 1.49        | 429   |
| Sandgate (Qld)      | RR[2532] | <b>2.24</b> | <b>3.11</b> | <b>4.20</b> | 4086  |
| Sandiford           | RR[2533] | 0.34        | 1.00        | 2.77        | 146   |
| Sandringham (Qld)   | RR[2534] | 0.30        | 0.96        | 3.06        | 45    |
| Sandstone Point     | RR[2535] | 0.55        | 1.03        | 1.73        | 3470  |
| Sandy Camp          | RR[2536] | 0.28        | 0.80        | 2.18        | 75    |
| Sandy Creek (Qld)   | RR[2537] | 0.24        | 0.64        | 1.57        | 469   |
| Sandy Pocket        | RR[2538] | 0.41        | 1.23        | 3.85        | 33    |
| Sandy Ridges        | RR[2539] | 0.30        | 0.84        | 2.41        | 70    |
| Sarabah             | RR[2540] | 0.34        | 0.95        | 2.73        | 55    |
| Sardine             | RR[2541] | 0.43        | 1.38        | 3.73        | 5     |
| Sarina              | RR[2542] | <b>1.18</b> | <b>1.83</b> | <b>2.67</b> | 4387  |
| Sarina Beach        | RR[2543] | 0.47        | 1.26        | 2.90        | 489   |
| Sarina Range        | RR[2544] | 0.24        | 0.76        | 2.08        | 199   |
| Saunders Beach      | RR[2545] | 0.40        | 1.20        | 3.16        | 356   |
| Savannah            | RR[2546] | 0.52        | 1.47        | 4.57        | 0     |
| Saxby               | RR[2547] | 0.45        | 1.41        | 4.38        | 12    |
| Scarborough (Qld)   | RR[2548] | <b>1.56</b> | <b>2.10</b> | <b>2.83</b> | 7394  |
| Scarness            | RR[2549] | 0.85        | 1.45        | 2.41        | 3049  |

|                                      |          |      |      |      |      |
|--------------------------------------|----------|------|------|------|------|
| Scotchy Pocket                       | RR[2550] | 0.29 | 0.88 | 2.47 | 61   |
| Scottville                           | RR[2551] | 0.29 | 0.97 | 3.07 | 205  |
| Scrub Creek                          | RR[2552] | 0.29 | 0.84 | 2.52 | 23   |
| Scrubby Creek (Blackall-Tambo - Qld) | RR[2553] | 0.38 | 1.21 | 3.71 | 5    |
| Scrubby Creek (Gympie - Qld)         | RR[2554] | 0.23 | 0.74 | 2.17 | 51   |
| Scrubby Mountain                     | RR[2555] | 0.25 | 0.74 | 2.20 | 124  |
| Seaforth (Qld)                       | RR[2556] | 0.62 | 1.59 | 3.39 | 670  |
| Sedgeford                            | RR[2557] | 0.37 | 1.08 | 3.02 | 0    |
| Seisia                               | RR[2558] | 0.19 | 0.75 | 2.61 | 178  |
| Selene                               | RR[2559] | 0.27 | 0.80 | 2.45 | 19   |
| Selwyn (Qld)                         | RR[2560] | 0.49 | 1.42 | 4.06 | 50   |
| Septimus                             | RR[2561] | 0.27 | 0.81 | 2.16 | 101  |
| Seven Hills (Qld)                    | RR[2562] | 0.59 | 1.16 | 2.19 | 1676 |
| Seventeen Mile                       | RR[2563] | 0.27 | 0.76 | 2.22 | 13   |
| Seventeen Mile Rocks                 | RR[2564] | 0.23 | 0.55 | 1.10 | 2021 |
| Seventeen Seventy                    | RR[2565] | 0.19 | 0.85 | 3.29 | 66   |
| Seventy Mile                         | RR[2566] | 0.36 | 0.93 | 2.61 | 183  |
| Severnlea                            | RR[2567] | 0.27 | 0.78 | 2.14 | 277  |
| Sexton                               | RR[2568] | 0.28 | 0.81 | 2.26 | 123  |
| Shailer Park                         | RR[2569] | 0.28 | 0.49 | 0.77 | 9517 |
| Shannonvale                          | RR[2570] | 0.70 | 1.81 | 4.36 | 156  |
| Sharon                               | RR[2571] | 0.30 | 0.73 | 1.64 | 1078 |
| Shaw                                 | RR[2572] | 0.24 | 0.64 | 1.79 | 429  |
| Sheep Station Creek                  | RR[2573] | 0.29 | 0.78 | 2.27 | 85   |
| Shelburne                            | RR[2574] | 0.33 | 1.13 | 3.20 | 23   |
| Sheldon                              | RR[2575] | 0.36 | 0.74 | 1.53 | 1413 |
| Shell Pocket                         | RR[2576] | 0.38 | 1.13 | 3.29 | 65   |
| Shelly Beach (Sunshine Coast - Qld)  | RR[2577] | 0.24 | 0.76 | 1.94 | 726  |
| Shelly Beach (Townsville - Qld)      | RR[2578] | 0.36 | 1.28 | 4.62 | 0    |
| Sherwood (Qld)                       | RR[2579] | 0.57 | 0.96 | 1.56 | 4294 |
| Shirbourne                           | RR[2580] | 0.38 | 1.11 | 3.07 | 57   |
| Shoal Point                          | RR[2581] | 0.20 | 0.61 | 1.54 | 773  |
| Shoalwater (Qld)                     | RR[2582] | 0.33 | 0.97 | 2.85 | 0    |
| Shorncliffe                          | RR[2583] | 0.66 | 1.35 | 2.55 | 1512 |
| Shute Harbour                        | RR[2584] | 0.15 | 0.71 | 2.86 | 108  |
| Silkstone                            | RR[2585] | 0.58 | 1.08 | 1.87 | 2799 |
| Silkwood                             | RR[2586] | 0.47 | 1.14 | 2.96 | 309  |
| Silky Oak                            | RR[2587] | 0.39 | 1.06 | 2.96 | 112  |
| Silver Creek                         | RR[2588] | 0.29 | 0.98 | 3.39 | 5    |
| Silver Ridge                         | RR[2589] | 0.23 | 0.68 | 1.83 | 141  |
| Silver Spur                          | RR[2590] | 0.31 | 0.94 | 2.96 | 58   |
| Silver Valley                        | RR[2591] | 0.50 | 1.30 | 3.74 | 130  |
| Silverdale (Qld)                     | RR[2592] | 0.24 | 0.67 | 1.88 | 95   |
| Silverleaf                           | RR[2593] | 0.28 | 0.80 | 2.31 | 38   |
| Silverleigh                          | RR[2594] | 0.29 | 0.75 | 2.19 | 60   |
| Silverwood                           | RR[2595] | 0.27 | 0.78 | 2.36 | 34   |
| Simmie                               | RR[2596] | 0.33 | 1.08 | 3.23 | 5    |
| Sinnamon Park                        | RR[2597] | 0.22 | 0.44 | 0.78 | 5152 |
| Sippy Downs                          | RR[2598] | 0.24 | 0.41 | 0.68 | 8192 |
| Skyring Reserve                      | RR[2599] | 0.28 | 0.84 | 2.52 | 32   |

|                                     |          |             |             |             |       |
|-------------------------------------|----------|-------------|-------------|-------------|-------|
| Slacks Creek                        | RR[2600] | 0.70        | 1.03        | 1.50        | 8060  |
| Slade Point                         | RR[2601] | 0.65        | 1.18        | 2.02        | 2670  |
| Sladevale                           | RR[2602] | 0.24        | 0.68        | 1.72        | 282   |
| Smithfield (Qld)                    | RR[2603] | 0.67        | 1.13        | 1.80        | 4250  |
| Smithlea                            | RR[2604] | 0.28        | 1.02        | 3.01        | 43    |
| Smoky Creek                         | RR[2605] | 0.49        | 1.45        | 3.84        | 128   |
| Soldiers Hill (Qld)                 | RR[2606] | 0.79        | 1.56        | 2.83        | 1456  |
| Somerset (Qld)                      | RR[2607] | 0.24        | 0.88        | 2.81        | 0     |
| Somerset Dam                        | RR[2608] | 0.29        | 0.82        | 2.50        | 65    |
| Sommariva                           | RR[2609] | 0.38        | 1.13        | 3.48        | 10    |
| Somme                               | RR[2610] | 0.29        | 0.91        | 2.66        | 43    |
| South Bingera                       | RR[2611] | 0.34        | 0.89        | 2.11        | 532   |
| South Brisbane                      | RR[2612] | 0.72        | 1.14        | 1.68        | 6576  |
| South East Nanango                  | RR[2613] | 0.37        | 0.96        | 2.53        | 240   |
| South Gladstone                     | RR[2614] | 0.43        | 0.83        | 1.57        | 2672  |
| South Innisfail                     | RR[2615] | 0.51        | 1.32        | 3.07        | 420   |
| South Isis                          | RR[2616] | 0.32        | 0.90        | 2.35        | 281   |
| South Johnstone                     | RR[2617] | 0.72        | 1.80        | 4.21        | 347   |
| South Kolan                         | RR[2618] | 0.26        | 0.63        | 1.48        | 841   |
| South Mackay                        | RR[2619] | 0.75        | 1.21        | 1.79        | 5565  |
| South Maclean                       | RR[2620] | 0.41        | 0.93        | 2.07        | 1092  |
| South Mission Beach                 | RR[2621] | 0.34        | 0.89        | 2.15        | 757   |
| South Nanango                       | RR[2622] | 0.28        | 0.76        | 1.76        | 739   |
| South Ripley                        | RR[2623] | 0.28        | 0.69        | 1.68        | 517   |
| South Stradbroke                    | RR[2624] | 0.19        | 0.69        | 2.95        | 38    |
| South Talwood                       | RR[2625] | 0.28        | 0.87        | 2.76        | 64    |
| South Toowoomba                     | RR[2626] | 0.94        | 1.49        | 2.21        | 4326  |
| South Townsville                    | RR[2627] | <b>1.21</b> | <b>2.14</b> | <b>3.42</b> | 2072  |
| South Trees                         | RR[2628] | 0.24        | 0.74        | 2.33        | 0     |
| South Wellesley Islands             | RR[2629] | 0.00        | 0.00        | 1.65        | 0     |
| South Yaamba                        | RR[2630] | 0.31        | 0.92        | 2.75        | 80    |
| Southbrook                          | RR[2631] | 0.27        | 0.72        | 1.78        | 489   |
| Southedge                           | RR[2632] | 0.43        | 1.19        | 3.36        | 21    |
| Southern Cross (Qld)                | RR[2633] | 0.41        | 1.12        | 2.51        | 417   |
| Southern Lamington                  | RR[2634] | 0.24        | 0.78        | 2.53        | 0     |
| Southern Moreton Bay Islands        | RR[2635] | 0.22        | 0.74        | 2.18        | 0     |
| Southport (Qld)                     | RR[2636] | <b>1.02</b> | <b>1.26</b> | <b>1.52</b> | 27923 |
| Southside                           | RR[2637] | 0.45        | 0.80        | 1.32        | 4598  |
| Southwood                           | RR[2638] | 0.32        | 0.87        | 2.38        | 64    |
| Speedwell                           | RR[2639] | 0.35        | 0.92        | 3.08        | 21    |
| Speewah                             | RR[2640] | 0.33        | 0.90        | 2.01        | 722   |
| Splinter Creek                      | RR[2641] | 0.29        | 0.85        | 2.54        | 23    |
| Split Yard Creek                    | RR[2642] | 0.26        | 0.81        | 2.32        | 31    |
| Spreadborough                       | RR[2643] | 0.48        | 1.58        | 4.64        | 20    |
| Spring Bluff                        | RR[2644] | 0.23        | 0.68        | 2.01        | 6     |
| Spring Creek (Banana - Qld)         | RR[2645] | 0.33        | 1.00        | 3.06        | 12    |
| Spring Creek (Lockyer Valley - Qld) | RR[2646] | 0.23        | 0.62        | 1.45        | 561   |
| Spring Creek (Toowoomba - Qld)      | RR[2647] | 0.26        | 0.75        | 2.25        | 157   |
| Spring Hill (Qld)                   | RR[2648] | 0.94        | 1.43        | 2.05        | 5601  |
| Spring Mountain (Qld)               | RR[2649] | 0.22        | 0.62        | 1.73        | 0     |

|                                  |          |             |             |             |       |
|----------------------------------|----------|-------------|-------------|-------------|-------|
| Springbrook                      | RR[2650] | 0.19        | 0.55        | 1.41        | 551   |
| Springdale (Qld)                 | RR[2651] | 0.30        | 0.93        | 2.62        | 18    |
| Springfield (Ipswich - Qld)      | RR[2652] | 0.17        | 0.36        | 0.69        | 4948  |
| Springfield (Mareeba - Qld)      | RR[2653] | 0.44        | 1.27        | 3.84        | 0     |
| Springfield Central              | RR[2654] | 0.18        | 0.53        | 1.56        | 114   |
| Springfield Lakes                | RR[2655] | 0.17        | 0.31        | 0.53        | 10973 |
| Springlands                      | RR[2656] | 0.37        | 1.05        | 3.39        | 39    |
| Springside (Qld)                 | RR[2657] | 0.24        | 0.75        | 2.19        | 91    |
| Springsure                       | RR[2658] | 0.42        | 1.12        | 2.45        | 865   |
| Springvale (Qld)                 | RR[2659] | 0.26        | 0.76        | 2.15        | 60    |
| Springwood (Qld)                 | RR[2660] | 0.31        | 0.54        | 0.92        | 7425  |
| Spurgeon                         | RR[2661] | 0.44        | 1.29        | 4.14        | 0     |
| St Agnes (Qld)                   | RR[2662] | 0.29        | 0.88        | 2.50        | 19    |
| St Aubyn                         | RR[2663] | 0.27        | 0.85        | 2.38        | 8     |
| St George (Qld)                  | RR[2664] | 0.67        | 1.25        | 2.16        | 2358  |
| St Helens (Fraser Coast - Qld)   | RR[2665] | 0.29        | 0.82        | 2.40        | 97    |
| St Helens (Toowoomba - Qld)      | RR[2666] | 0.26        | 0.76        | 2.23        | 18    |
| St Helens Beach                  | RR[2667] | 0.30        | 0.90        | 2.51        | 160   |
| St Kilda (Qld)                   | RR[2668] | 0.28        | 0.81        | 2.34        | 74    |
| St Lawrence                      | RR[2669] | <b>1.05</b> | <b>2.53</b> | <b>6.41</b> | 210   |
| St Lucia                         | RR[2670] | 0.22        | 0.38        | 0.61        | 11498 |
| St Mary                          | RR[2671] | 0.31        | 0.89        | 2.41        | 63    |
| St Ruth                          | RR[2672] | 0.25        | 0.74        | 2.04        | 108   |
| Staaten                          | RR[2673] | 0.44        | 1.38        | 4.10        | 0     |
| Stafford                         | RR[2674] | <b>1.07</b> | <b>1.60</b> | <b>2.34</b> | 5483  |
| Stafford Heights                 | RR[2675] | <b>1.01</b> | <b>1.50</b> | <b>2.11</b> | 5593  |
| Stalworth                        | RR[2676] | 0.32        | 0.91        | 2.64        | 30    |
| Stamford                         | RR[2677] | 0.50        | 1.33        | 3.62        | 38    |
| Stanage                          | RR[2678] | 0.28        | 0.92        | 3.05        | 80    |
| Stanmore (Qld)                   | RR[2679] | 0.32        | 0.84        | 2.05        | 348   |
| Stanthorpe                       | RR[2680] | 0.73        | 1.20        | 1.85        | 4489  |
| Stanwell                         | RR[2681] | 0.55        | 1.42        | 3.21        | 259   |
| Stapylton                        | RR[2682] | 0.26        | 0.72        | 1.88        | 367   |
| Starcke                          | RR[2683] | 0.41        | 1.33        | 4.36        | 3     |
| Steiglitz (Qld)                  | RR[2684] | 0.34        | 0.89        | 2.16        | 588   |
| Stewart Creek Valley             | RR[2685] | 0.40        | 1.30        | 3.65        | 18    |
| Stewarton (Qld)                  | RR[2686] | 0.30        | 0.93        | 2.73        | 31    |
| Stockhaven                       | RR[2687] | 0.31        | 0.92        | 2.64        | 5     |
| Stockleigh                       | RR[2688] | 0.34        | 0.82        | 1.89        | 606   |
| Stockton (Qld)                   | RR[2689] | 0.47        | 1.42        | 4.09        | 17    |
| Stockyard (Livingstone - Qld)    | RR[2690] | 0.29        | 0.94        | 2.83        | 16    |
| Stockyard (Lockyer Valley - Qld) | RR[2691] | 0.25        | 0.68        | 2.00        | 44    |
| Stokes                           | RR[2692] | 0.53        | 1.48        | 3.89        | 69    |
| Stonehenge (Barcoo - Qld)        | RR[2693] | 0.49        | 1.33        | 3.58        | 41    |
| Stonehenge (Toowoomba - Qld)     | RR[2694] | 0.31        | 0.85        | 2.35        | 27    |
| Stonelands                       | RR[2695] | 0.32        | 0.86        | 2.38        | 34    |
| Stoneleigh (Qld)                 | RR[2696] | 0.25        | 0.71        | 1.93        | 92    |
| Stony Creek (Qld)                | RR[2697] | 0.24        | 0.68        | 1.87        | 214   |
| Storm King                       | RR[2698] | 0.30        | 0.89        | 2.87        | 81    |
| Stoters Hill                     | RR[2699] | 0.43        | 1.18        | 3.54        | 90    |

|                                  |          |             |             |             |       |
|----------------------------------|----------|-------------|-------------|-------------|-------|
| Stratford (Qld)                  | RR[2700] | 0.65        | 1.39        | 2.77        | 907   |
| Strathdickie                     | RR[2701] | 0.30        | 0.80        | 1.95        | 678   |
| Strathfield (Qld)                | RR[2702] | 0.30        | 0.88        | 2.62        | 8     |
| Strathmore (Qld)                 | RR[2703] | 0.46        | 1.38        | 3.51        | 8     |
| Strathpine                       | RR[2704] | 0.78        | 1.15        | 1.64        | 7696  |
| Stretton                         | RR[2705] | 0.12        | 0.27        | 0.57        | 3524  |
| Struck Oil                       | RR[2706] | 0.44        | 1.35        | 3.73        | 158   |
| Stuart (Qld)                     | RR[2707] | 0.53        | 1.13        | 2.24        | 1305  |
| Sturt (Qld)                      | RR[2708] | 0.42        | 1.48        | 5.05        | 0     |
| Sugarloaf (Southern Downs - Qld) | RR[2709] | 0.30        | 0.91        | 2.76        | 98    |
| Sugarloaf (Whitsunday - Qld)     | RR[2710] | 0.23        | 0.77        | 2.15        | 221   |
| Sujeewong                        | RR[2711] | 0.32        | 0.94        | 2.63        | 11    |
| Summerholm                       | RR[2712] | 0.20        | 0.57        | 1.35        | 541   |
| Sumner                           | RR[2713] | 0.20        | 0.60        | 1.56        | 478   |
| Sun Valley (Qld)                 | RR[2714] | 0.44        | 1.04        | 2.08        | 986   |
| Sundown (Cassowary Coast - Qld)  | RR[2715] | 0.37        | 1.09        | 2.88        | 157   |
| Sundown (Southern Downs - Qld)   | RR[2716] | 0.31        | 0.99        | 3.29        | 0     |
| Sunny Nook                       | RR[2717] | 0.27        | 0.83        | 2.37        | 20    |
| Sunnybank                        | RR[2718] | 0.47        | 0.77        | 1.18        | 7589  |
| Sunnybank Hills                  | RR[2719] | 0.34        | 0.52        | 0.77        | 15035 |
| Sunnyside (Qld)                  | RR[2720] | 0.26        | 0.81        | 2.02        | 115   |
| Sunrise Beach                    | RR[2721] | 0.41        | 0.82        | 1.59        | 2755  |
| Sunset                           | RR[2722] | 0.75        | 1.42        | 2.64        | 1621  |
| Sunshine Acres                   | RR[2723] | 0.22        | 0.59        | 1.38        | 757   |
| Sunshine Beach                   | RR[2724] | 0.48        | 0.98        | 1.95        | 2073  |
| Surat                            | RR[2725] | 0.32        | 0.98        | 2.44        | 332   |
| Surbiton                         | RR[2726] | 0.36        | 1.01        | 2.77        | 66    |
| Surfers Paradise                 | RR[2727] | 0.70        | 0.91        | 1.16        | 21739 |
| Susan River                      | RR[2728] | 0.31        | 0.82        | 2.49        | 101   |
| Suttor                           | RR[2729] | 0.32        | 0.94        | 2.87        | 0     |
| Svensson Heights                 | RR[2730] | <b>1.14</b> | <b>1.92</b> | <b>3.03</b> | 2661  |
| Swan Creek (Qld)                 | RR[2731] | 0.24        | 0.72        | 1.97        | 112   |
| Swanbank                         | RR[2732] | 0.26        | 0.77        | 2.05        | 0     |
| Swanfels                         | RR[2733] | 0.23        | 0.67        | 1.86        | 107   |
| Swans Lagoon                     | RR[2734] | 0.34        | 1.08        | 3.59        | 0     |
| Sweers Island                    | RR[2735] | 0.00        | 0.00        | 1.04        | 5     |
| Syndicate                        | RR[2736] | 0.44        | 1.40        | 3.93        | 0     |
| Taabinga                         | RR[2737] | 0.24        | 0.67        | 1.78        | 443   |
| Tablederry                       | RR[2738] | 0.47        | 1.38        | 3.91        | 26    |
| Tablelands (Gladstone - Qld)     | RR[2739] | 0.30        | 0.88        | 2.33        | 0     |
| Tablelands (South Burnett - Qld) | RR[2740] | 0.28        | 0.81        | 2.30        | 88    |
| Tabooba                          | RR[2741] | 0.26        | 0.74        | 2.31        | 54    |
| Tabragalba                       | RR[2742] | 0.26        | 0.75        | 2.15        | 39    |
| Taigum                           | RR[2743] | 0.33        | 0.61        | 1.05        | 5391  |
| Takilberan                       | RR[2744] | 0.28        | 0.83        | 2.43        | 17    |
| Takura                           | RR[2745] | 0.34        | 0.90        | 2.27        | 403   |
| Talaroo                          | RR[2746] | 0.41        | 1.37        | 4.33        | 0     |
| Taldora                          | RR[2747] | 0.54        | 1.48        | 4.27        | 34    |
| Talegalla Weir                   | RR[2748] | 0.31        | 0.86        | 2.32        | 114   |
| Talgai                           | RR[2749] | 0.30        | 0.78        | 2.15        | 87    |



|                     |          |      |      |      |      |
|---------------------|----------|------|------|------|------|
| Tallai              | RR[2750] | 0.23 | 0.49 | 0.92 | 3397 |
| Tallebudgera        | RR[2751] | 0.78 | 1.39 | 2.26 | 2934 |
| Tallebudgera Valley | RR[2752] | 0.29 | 0.68 | 1.46 | 1308 |
| Tallegalla          | RR[2753] | 0.35 | 1.03 | 2.62 | 274  |
| Tam O'Shanter       | RR[2754] | 0.39 | 1.13 | 3.28 | 0    |
| Tamaree             | RR[2755] | 0.20 | 0.56 | 1.36 | 647  |
| Tambo               | RR[2756] | 0.42 | 1.19 | 3.08 | 304  |
| Tamborine           | RR[2757] | 0.50 | 0.92 | 1.63 | 3172 |
| Tamborine Mountain  | RR[2758] | 0.61 | 0.98 | 1.48 | 6209 |
| Tamrookum           | RR[2759] | 0.25 | 0.72 | 2.16 | 72   |
| Tamrookum Creek     | RR[2760] | 0.24 | 0.77 | 2.55 | 29   |
| Tanah Merah         | RR[2761] | 0.32 | 0.62 | 1.16 | 3758 |
| Tanawha             | RR[2762] | 0.26 | 0.57 | 1.36 | 1051 |
| Tanbar              | RR[2763] | 0.38 | 1.28 | 3.70 | 3    |
| Tanby               | RR[2764] | 0.41 | 1.06 | 2.57 | 404  |
| Tandora             | RR[2765] | 0.28 | 0.88 | 2.57 | 3    |
| Tandur              | RR[2766] | 0.23 | 0.65 | 1.85 | 157  |
| Tangorin            | RR[2767] | 0.43 | 1.32 | 3.69 | 38   |
| Tannum Sands        | RR[2768] | 0.18 | 0.39 | 0.80 | 3904 |
| Tannymorel          | RR[2769] | 0.23 | 0.70 | 1.97 | 132  |
| Tansey              | RR[2770] | 0.29 | 0.82 | 2.19 | 111  |
| Tara (Qld)          | RR[2771] | 0.91 | 1.66 | 2.80 | 1912 |
| Tara Station        | RR[2772] | 0.43 | 1.24 | 3.91 | 10   |
| Taragoola           | RR[2773] | 0.27 | 0.76 | 2.54 | 0    |
| Tarampa             | RR[2774] | 0.32 | 0.85 | 2.52 | 263  |
| Taranganba          | RR[2775] | 0.23 | 0.57 | 1.21 | 1815 |
| Tarawera            | RR[2776] | 0.34 | 0.89 | 2.89 | 28   |
| Targinnie           | RR[2777] | 0.30 | 0.94 | 2.73 | 55   |
| Taringa             | RR[2778] | 0.20 | 0.38 | 0.65 | 7435 |
| Tarome              | RR[2779] | 0.22 | 0.68 | 1.82 | 92   |
| Taromeo             | RR[2780] | 0.27 | 0.75 | 1.90 | 285  |
| Tarong              | RR[2781] | 0.27 | 0.84 | 2.24 | 141  |
| Taroom              | RR[2782] | 0.75 | 1.61 | 3.27 | 695  |
| Taroomball          | RR[2783] | 0.27 | 0.72 | 1.72 | 652  |
| Tarragindi          | RR[2784] | 0.80 | 1.18 | 1.68 | 8351 |
| Tarramba            | RR[2785] | 0.27 | 0.87 | 2.72 | 43   |
| Tarzali             | RR[2786] | 0.33 | 0.90 | 2.21 | 331  |
| Taunton (Qld)       | RR[2787] | 0.29 | 0.82 | 2.28 | 58   |
| Taylors Beach (Qld) | RR[2788] | 0.49 | 1.43 | 3.61 | 296  |
| Te Kowai            | RR[2789] | 0.29 | 0.76 | 2.14 | 182  |
| Teddington          | RR[2790] | 0.29 | 0.79 | 2.10 | 206  |
| Teebar              | RR[2791] | 0.29 | 0.86 | 2.68 | 37   |
| Teelah              | RR[2792] | 0.29 | 0.85 | 2.50 | 52   |
| Teelba              | RR[2793] | 0.29 | 0.90 | 2.63 | 28   |
| Telina              | RR[2794] | 0.21 | 0.48 | 1.05 | 1654 |
| Tellebang           | RR[2795] | 0.28 | 0.80 | 2.36 | 52   |
| Templin             | RR[2796] | 0.23 | 0.73 | 2.07 | 80   |
| Teneriffe           | RR[2797] | 0.14 | 0.31 | 0.62 | 4962 |
| Tennyson (Qld)      | RR[2798] | 0.32 | 0.78 | 1.75 | 853  |
| Terrica             | RR[2799] | 0.30 | 0.91 | 2.75 | 14   |

|                             |          |      |      |      |       |
|-----------------------------|----------|------|------|------|-------|
| Teviotville                 | RR[2800] | 0.23 | 0.72 | 1.94 | 99    |
| Tewantin                    | RR[2801] | 1.00 | 1.40 | 1.90 | 9238  |
| Texas (Qld)                 | RR[2802] | 0.56 | 1.42 | 3.10 | 710   |
| Thabeban                    | RR[2803] | 0.47 | 0.94 | 1.80 | 2222  |
| Thagoona                    | RR[2804] | 0.20 | 0.51 | 1.25 | 813   |
| Thallon                     | RR[2805] | 0.25 | 0.81 | 2.27 | 200   |
| Thane                       | RR[2806] | 0.28 | 0.86 | 2.73 | 27    |
| Thanes Creek                | RR[2807] | 0.27 | 0.85 | 2.71 | 30    |
| Thangool                    | RR[2808] | 0.30 | 0.79 | 1.82 | 588   |
| Thargomindah                | RR[2809] | 0.30 | 0.97 | 2.94 | 225   |
| The Bluff (Ipswich - Qld)   | RR[2810] | 0.23 | 0.71 | 1.97 | 35    |
| The Bluff (Toowoomba - Qld) | RR[2811] | 0.31 | 0.86 | 2.53 | 0     |
| The Caves                   | RR[2812] | 0.42 | 1.02 | 2.43 | 573   |
| The Common                  | RR[2813] | 0.42 | 1.27 | 4.03 | 0     |
| The Dawn                    | RR[2814] | 0.20 | 0.59 | 1.50 | 436   |
| The Dimonds                 | RR[2815] | 0.30 | 0.93 | 2.99 | 0     |
| The Falls                   | RR[2816] | 0.23 | 0.71 | 2.18 | 53    |
| The Gap (Brisbane - Qld)    | RR[2817] | 0.83 | 1.15 | 1.51 | 13134 |
| The Gap (Mount Isa - Qld)   | RR[2818] | 0.37 | 0.91 | 2.29 | 672   |
| The Gemfields               | RR[2819] | 0.46 | 1.04 | 2.10 | 1288  |
| The Glen (Qld)              | RR[2820] | 0.28 | 0.82 | 2.46 | 27    |
| The Gums                    | RR[2821] | 0.35 | 1.09 | 2.99 | 126   |
| The Head                    | RR[2822] | 0.20 | 0.70 | 2.32 | 7     |
| The Hermitage               | RR[2823] | 0.26 | 0.75 | 2.19 | 46    |
| The Keppels                 | RR[2824] | 0.21 | 0.90 | 3.61 | 47    |
| The Leap                    | RR[2825] | 0.28 | 0.76 | 1.78 | 532   |
| The Limits                  | RR[2826] | 0.28 | 0.91 | 2.64 | 4     |
| The Mine                    | RR[2827] | 0.38 | 1.13 | 3.36 | 41    |
| The Narrows (Qld)           | RR[2828] | 0.37 | 0.97 | 2.70 | 3     |
| The Palms                   | RR[2829] | 0.20 | 0.51 | 1.23 | 845   |
| The Percy Group             | RR[2830] | 0.19 | 0.94 | 4.12 | 0     |
| The Pines (Qld)             | RR[2831] | 0.27 | 0.81 | 2.55 | 45    |
| The Range (Qld)             | RR[2832] | 0.69 | 1.16 | 1.84 | 4275  |
| The Summit                  | RR[2833] | 0.31 | 0.94 | 2.41 | 338   |
| Theebine                    | RR[2834] | 0.40 | 1.18 | 3.23 | 87    |
| Theodore (Qld)              | RR[2835] | 0.56 | 1.55 | 3.73 | 372   |
| Theresa Creek (Qld)         | RR[2836] | 0.32 | 0.91 | 2.76 | 33    |
| Thinoomba                   | RR[2837] | 0.31 | 0.91 | 2.47 | 31    |
| Thompson Point              | RR[2838] | 0.34 | 1.03 | 3.28 | 10    |
| Thoopara                    | RR[2839] | 0.35 | 0.99 | 2.88 | 31    |
| Thornborough                | RR[2840] | 0.42 | 1.16 | 3.69 | 6     |
| Thorndale                   | RR[2841] | 0.36 | 1.11 | 3.12 | 120   |
| Thorneside                  | RR[2842] | 0.38 | 0.73 | 1.31 | 3079  |
| Thornlands                  | RR[2843] | 0.48 | 0.73 | 1.04 | 11620 |
| Thornton (Qld)              | RR[2844] | 0.29 | 0.82 | 2.15 | 165   |
| Thornton Beach              | RR[2845] | 0.41 | 1.42 | 4.88 | 5     |
| Thornville                  | RR[2846] | 0.38 | 1.08 | 3.34 | 23    |
| Three Moon                  | RR[2847] | 0.29 | 0.82 | 2.28 | 119   |
| Three Rivers                | RR[2848] | 0.65 | 2.10 | 5.94 | 27    |
| Thulimbah                   | RR[2849] | 0.42 | 1.23 | 3.34 | 272   |

|                    |          |             |             |             |      |
|--------------------|----------|-------------|-------------|-------------|------|
| Thuringowa Central | RR[2850] | 0.21        | 0.52        | 1.19        | 1637 |
| Thursday Island    | RR[2851] | 0.74        | 1.50        | 2.73        | 2117 |
| Tiaro              | RR[2852] | 0.57        | 1.41        | 3.00        | 646  |
| Tieri              | RR[2853] | 0.15        | 0.47        | 1.46        | 766  |
| Tin Can Bay        | RR[2854] | <b>1.45</b> | <b>2.52</b> | <b>4.01</b> | 2020 |
| Tinana             | RR[2855] | 0.29        | 0.57        | 0.96        | 4449 |
| Tinana South       | RR[2856] | 0.25        | 0.69        | 1.73        | 409  |
| Tinaroo            | RR[2857] | 0.42        | 1.15        | 2.82        | 268  |
| Tinbeerwah         | RR[2858] | 0.73        | 1.57        | 3.12        | 835  |
| Tingalpa           | RR[2859] | 0.53        | 0.83        | 1.33        | 6738 |
| Tingoora           | RR[2860] | 0.25        | 0.75        | 1.96        | 227  |
| Tingun             | RR[2861] | 0.34        | 0.90        | 2.36        | 116  |
| Tinnanbar          | RR[2862] | 0.22        | 0.84        | 2.67        | 115  |
| Tipton             | RR[2863] | 0.26        | 0.78        | 2.25        | 26   |
| Tirroan            | RR[2864] | 0.24        | 0.76        | 2.22        | 152  |
| Tivoli             | RR[2865] | 0.72        | 1.45        | 2.78        | 1182 |
| Tocal (Qld)        | RR[2866] | 0.45        | 1.38        | 4.16        | 14   |
| Togara             | RR[2867] | 0.30        | 0.91        | 2.70        | 7    |
| Toko               | RR[2868] | 0.47        | 1.55        | 4.75        | 4    |
| Tolga              | RR[2869] | 0.54        | 1.06        | 1.92        | 2181 |
| Toll               | RR[2870] | 0.49        | 1.27        | 2.82        | 530  |
| Toobanna           | RR[2871] | 0.40        | 1.06        | 2.68        | 227  |
| Toobeah            | RR[2872] | 0.36        | 1.07        | 2.92        | 144  |
| Toogoolawah        | RR[2873] | 0.33        | 0.80        | 1.80        | 1077 |
| Toogoom            | RR[2874] | 0.58        | 1.15        | 2.19        | 1743 |
| Toolakea           | RR[2875] | 0.19        | 0.76        | 2.86        | 166  |
| Toolara Forest     | RR[2876] | 0.31        | 0.88        | 2.49        | 0    |
| Toolburra          | RR[2877] | 0.26        | 0.80        | 2.34        | 34   |
| Toolooa            | RR[2878] | 0.24        | 0.67        | 1.64        | 701  |
| Toomulla           | RR[2879] | 0.34        | 1.27        | 3.92        | 164  |
| Toondahra          | RR[2880] | 0.30        | 0.90        | 2.75        | 8    |
| Toonpan            | RR[2881] | 0.33        | 1.00        | 3.01        | 53   |
| Toorbul            | RR[2882] | 0.35        | 0.88        | 2.15        | 829  |
| Toowong            | RR[2883] | 0.47        | 0.73        | 1.07        | 9669 |
| Toowoomba City     | RR[2884] | <b>3.19</b> | <b>4.91</b> | <b>6.98</b> | 1839 |
| Top Camp           | RR[2885] | 0.20        | 0.54        | 1.33        | 665  |
| Topaz              | RR[2886] | 0.45        | 1.38        | 3.78        | 126  |
| Torbanlea          | RR[2887] | 0.44        | 1.05        | 2.32        | 623  |
| Torquay (Qld)      | RR[2888] | <b>1.18</b> | <b>1.75</b> | <b>2.46</b> | 5434 |
| Torrens Creek      | RR[2889] | 0.41        | 1.14        | 3.28        | 67   |
| Torres Strait      | RR[2890] | 0.35        | 1.34        | 4.37        | 0    |
| Torrington (Qld)   | RR[2891] | 0.32        | 0.81        | 2.01        | 726  |
| Towen Mountain     | RR[2892] | 0.24        | 0.69        | 1.87        | 239  |
| Towers Hill        | RR[2893] | 0.39        | 1.11        | 2.71        | 190  |
| Town Common        | RR[2894] | 0.36        | 1.00        | 2.86        | 71   |
| Townson            | RR[2895] | 0.24        | 0.68        | 1.98        | 38   |
| Townsville City    | RR[2896] | <b>1.62</b> | <b>2.51</b> | <b>3.76</b> | 2682 |
| Townview           | RR[2897] | 0.77        | 1.53        | 2.79        | 1565 |
| Traveston          | RR[2898] | 0.20        | 0.59        | 1.53        | 395  |
| Trebonne           | RR[2899] | 0.46        | 1.22        | 3.10        | 350  |

|                     |          |             |             |             |       |
|---------------------|----------|-------------|-------------|-------------|-------|
| Tregony             | RR[2900] | 0.32        | 0.90        | 2.69        | 28    |
| Trinity Beach       | RR[2901] | 0.50        | 0.88        | 1.46        | 4424  |
| Trinity Park        | RR[2902] | 0.38        | 0.79        | 1.45        | 2403  |
| Trotter Creek       | RR[2903] | 0.37        | 1.13        | 3.57        | 10    |
| Trunding            | RR[2904] | 0.24        | 0.64        | 1.58        | 752   |
| Tuan                | RR[2905] | 0.36        | 1.10        | 3.26        | 136   |
| Tuan Forest         | RR[2906] | 0.30        | 0.91        | 2.54        | 0     |
| Tuchekoi            | RR[2907] | 0.26        | 0.73        | 2.00        | 155   |
| Tuckerang           | RR[2908] | 0.29        | 0.82        | 2.34        | 52    |
| Tuen                | RR[2909] | 0.35        | 1.13        | 3.59        | 12    |
| Tugun               | RR[2910] | 0.99        | 1.52        | 2.21        | 5515  |
| Tully               | RR[2911] | <b>2.08</b> | <b>3.30</b> | <b>5.01</b> | 1960  |
| Tully Heads         | RR[2912] | 0.32        | 0.91        | 2.46        | 305   |
| Tummaville          | RR[2913] | 0.29        | 0.80        | 2.35        | 54    |
| Tumoulin            | RR[2914] | 0.35        | 1.05        | 3.08        | 93    |
| Tungamull           | RR[2915] | 0.28        | 0.83        | 2.24        | 355   |
| Turallin            | RR[2916] | 0.29        | 0.82        | 2.32        | 54    |
| Turkey Beach        | RR[2917] | 0.30        | 1.08        | 3.99        | 165   |
| Turrawulla          | RR[2918] | 0.32        | 0.94        | 2.75        | 7     |
| Twin Waters         | RR[2919] | 0.14        | 0.36        | 0.86        | 2357  |
| Two Mile            | RR[2920] | 0.26        | 0.74        | 2.13        | 78    |
| Tyrconnel           | RR[2921] | 0.37        | 1.11        | 3.25        | 26    |
| Ugar Island         | RR[2922] | 0.21        | 1.03        | 4.91        | 50    |
| Ulogie              | RR[2923] | 0.33        | 0.99        | 2.72        | 21    |
| Umagico             | RR[2924] | 0.23        | 0.76        | 2.10        | 253   |
| Umbiram             | RR[2925] | 0.24        | 0.67        | 1.97        | 108   |
| Underwood (Qld)     | RR[2926] | 0.23        | 0.47        | 0.85        | 4865  |
| Undullah            | RR[2927] | 0.23        | 0.64        | 2.03        | 35    |
| Upland              | RR[2928] | 0.44        | 1.14        | 3.98        | 12    |
| Upper Barron        | RR[2929] | 0.33        | 0.89        | 2.21        | 357   |
| Upper Brookfield    | RR[2930] | 0.27        | 0.71        | 1.75        | 616   |
| Upper Caboolture    | RR[2931] | 0.18        | 0.42        | 0.85        | 3190  |
| Upper Coomera       | RR[2932] | 0.16        | 0.27        | 0.41        | 18254 |
| Upper Cooyar Creek  | RR[2933] | 0.27        | 0.85        | 2.24        | 8     |
| Upper Cornish Creek | RR[2934] | 0.41        | 1.23        | 3.52        | 36    |
| Upper Daintree      | RR[2935] | 0.43        | 1.40        | 4.29        | 6     |
| Upper Daradgee      | RR[2936] | 0.51        | 1.53        | 4.17        | 85    |
| Upper Dawson        | RR[2937] | 0.36        | 1.06        | 3.27        | 17    |
| Upper Flagstone     | RR[2938] | 0.24        | 0.63        | 1.73        | 146   |
| Upper Freestone     | RR[2939] | 0.23        | 0.68        | 1.94        | 76    |
| Upper Glastonbury   | RR[2940] | 0.26        | 0.78        | 2.14        | 36    |
| Upper Haughton      | RR[2941] | 0.37        | 1.05        | 2.86        | 62    |
| Upper Kandanga      | RR[2942] | 0.28        | 0.81        | 2.18        | 54    |
| Upper Kedron        | RR[2943] | 0.25        | 0.52        | 0.95        | 2972  |
| Upper Lockyer       | RR[2944] | 0.21        | 0.56        | 1.43        | 431   |
| Upper Mount Gravatt | RR[2945] | 0.76        | 1.16        | 1.63        | 7912  |
| Upper Pilton        | RR[2946] | 0.25        | 0.72        | 2.19        | 58    |
| Upper Pinelands     | RR[2947] | 0.28        | 0.84        | 2.62        | 23    |
| Upper Stone         | RR[2948] | 0.43        | 1.12        | 3.01        | 77    |
| Upper Tenthill      | RR[2949] | 0.20        | 0.62        | 1.67        | 183   |

|                       |          |      |      |      |       |
|-----------------------|----------|------|------|------|-------|
| Upper Warrego         | RR[2950] | 0.34 | 1.09 | 3.25 | 0     |
| Upper Wheatvale       | RR[2951] | 0.24 | 0.83 | 2.52 | 45    |
| Upper Yarraman        | RR[2952] | 0.29 | 0.82 | 2.21 | 83    |
| Urangan               | RR[2953] | 0.83 | 1.21 | 1.71 | 8228  |
| Urraween              | RR[2954] | 0.27 | 0.50 | 0.88 | 5850  |
| Utchee Creek          | RR[2955] | 0.34 | 0.98 | 2.72 | 203   |
| V Gate                | RR[2956] | 0.38 | 1.02 | 3.05 | 20    |
| Valdora               | RR[2957] | 0.20 | 0.60 | 1.56 | 426   |
| Vale View             | RR[2958] | 0.19 | 0.58 | 1.49 | 348   |
| Valentine Plains      | RR[2959] | 0.28 | 0.74 | 1.82 | 313   |
| Valkyrie              | RR[2960] | 0.26 | 0.79 | 2.17 | 96    |
| Valley Of Lagoons     | RR[2961] | 0.42 | 1.08 | 3.21 | 45    |
| Varsity Lakes         | RR[2962] | 0.57 | 0.81 | 1.14 | 12134 |
| Vasa Views            | RR[2963] | 0.42 | 1.11 | 3.03 | 109   |
| Ventnor (Qld)         | RR[2964] | 0.26 | 0.82 | 2.37 | 14    |
| Veradilla             | RR[2965] | 0.22 | 0.65 | 1.80 | 85    |
| Veresdale             | RR[2966] | 0.23 | 0.62 | 1.60 | 322   |
| Veresdale Scrub       | RR[2967] | 0.27 | 0.72 | 1.85 | 371   |
| Vergemont             | RR[2968] | 0.51 | 1.45 | 4.15 | 26    |
| Vernor                | RR[2969] | 0.25 | 0.72 | 1.92 | 192   |
| Verrierdale           | RR[2970] | 0.34 | 0.89 | 1.95 | 615   |
| Veteran               | RR[2971] | 0.27 | 0.68 | 1.66 | 708   |
| Victoria Hill         | RR[2972] | 0.27 | 0.81 | 2.46 | 24    |
| Victoria Plains       | RR[2973] | 0.24 | 0.65 | 1.76 | 301   |
| Victoria Plantation   | RR[2974] | 0.58 | 1.60 | 4.08 | 137   |
| Victoria Point (Qld)  | RR[2975] | 0.64 | 0.90 | 1.25 | 12419 |
| Victoria Vale         | RR[2976] | 0.51 | 1.45 | 4.44 | 0     |
| Victory Heights (Qld) | RR[2977] | 0.29 | 0.75 | 1.84 | 453   |
| Villeneuve            | RR[2978] | 0.46 | 1.19 | 3.47 | 142   |
| Vincent               | RR[2979] | 0.60 | 1.16 | 2.17 | 1752  |
| Vinegar Hill          | RR[2980] | 0.28 | 0.76 | 2.04 | 47    |
| Virginia (Qld)        | RR[2981] | 0.77 | 1.48 | 2.63 | 1762  |
| Wacol                 | RR[2982] | 0.50 | 0.94 | 1.60 | 3651  |
| Wahoon                | RR[2983] | 0.29 | 0.92 | 2.72 | 0     |
| Waikola               | RR[2984] | 0.32 | 0.96 | 2.89 | 22    |
| Wainui                | RR[2985] | 0.24 | 0.78 | 2.48 | 0     |
| Wairuna               | RR[2986] | 0.40 | 1.23 | 3.55 | 0     |
| Wakerley              | RR[2987] | 0.23 | 0.44 | 0.78 | 5980  |
| Walhallow             | RR[2988] | 0.35 | 1.09 | 3.01 | 10    |
| Walkamin              | RR[2989] | 0.55 | 1.31 | 3.27 | 393   |
| Walkers Point         | RR[2990] | 0.31 | 0.91 | 2.48 | 91    |
| Walkerston            | RR[2991] | 0.40 | 0.82 | 1.53 | 2661  |
| Walkervale            | RR[2992] | 0.77 | 1.37 | 2.36 | 2368  |
| Wallaces Creek        | RR[2993] | 0.23 | 0.68 | 1.95 | 58    |
| Wallaman              | RR[2994] | 0.39 | 1.22 | 3.85 | 0     |
| Wallangarra           | RR[2995] | 0.52 | 1.57 | 3.72 | 384   |
| Wallaroo (Qld)        | RR[2996] | 0.31 | 0.98 | 2.97 | 6     |
| Wallaville            | RR[2997] | 0.43 | 1.15 | 2.84 | 316   |
| Walligan              | RR[2998] | 0.47 | 1.15 | 2.84 | 305   |
| Walloon               | RR[2999] | 0.20 | 0.47 | 1.06 | 1316  |

|                     |          |             |             |             |      |
|---------------------|----------|-------------|-------------|-------------|------|
| Wallu               | RR[3000] | 0.29        | 0.93        | 2.95        | 66   |
| Wallumbilla         | RR[3001] | 0.24        | 0.74        | 2.11        | 300  |
| Wallumbilla North   | RR[3002] | 0.32        | 0.87        | 2.29        | 114  |
| Wallumbilla South   | RR[3003] | 0.32        | 0.88        | 2.49        | 50   |
| Walmul              | RR[3004] | 0.36        | 1.09        | 3.31        | 25   |
| Walter Hill         | RR[3005] | 0.44        | 1.20        | 3.12        | 0    |
| Walter Lever Estate | RR[3006] | 0.40        | 1.23        | 3.59        | 45   |
| Walterhall          | RR[3007] | 0.36        | 1.10        | 3.20        | 117  |
| Wamuran             | RR[3008] | 0.55        | 0.99        | 1.77        | 2576 |
| Wamuran Basin       | RR[3009] | 0.31        | 0.90        | 2.60        | 112  |
| Wandal              | RR[3010] | 0.62        | 1.16        | 1.87        | 3331 |
| Wandoan             | RR[3011] | 0.65        | 1.62        | 3.40        | 483  |
| Wangan              | RR[3012] | <b>1.06</b> | <b>2.32</b> | <b>4.67</b> | 508  |
| Wangaratta (Qld)    | RR[3013] | 0.37        | 1.17        | 3.52        | 17   |
| Wangetti            | RR[3014] | 0.34        | 1.07        | 3.29        | 47   |
| Wanjuru             | RR[3015] | 0.43        | 1.26        | 4.56        | 0    |
| Wanora              | RR[3016] | 0.26        | 0.70        | 1.80        | 234  |
| Warana              | RR[3017] | 0.87        | 1.46        | 2.38        | 2981 |
| Warburton (Qld)     | RR[3018] | 0.49        | 1.56        | 4.62        | 0    |
| Ward                | RR[3019] | 0.42        | 1.15        | 3.33        | 55   |
| Warenda             | RR[3020] | 0.50        | 1.52        | 4.33        | 0    |
| Warkon              | RR[3021] | 0.32        | 0.93        | 2.71        | 33   |
| Warner              | RR[3022] | 0.33        | 0.56        | 0.89        | 8530 |
| Warnoah             | RR[3023] | 0.32        | 0.93        | 2.70        | 39   |
| Warnung             | RR[3024] | 0.25        | 0.85        | 2.54        | 11   |
| Warra               | RR[3025] | 0.47        | 1.28        | 3.81        | 153  |
| Warraber Islet      | RR[3026] | 0.63        | 2.12        | 6.57        | 163  |
| Warrami             | RR[3027] | 0.33        | 1.11        | 3.87        | 48   |
| Warrill View        | RR[3028] | 0.22        | 0.60        | 1.75        | 198  |
| Warroo (Qld)        | RR[3029] | 0.29        | 0.92        | 2.66        | 25   |
| Warrubullen         | RR[3030] | 0.40        | 1.23        | 3.53        | 51   |
| Warwick (Qld)       | RR[3031] | 0.79        | 1.14        | 1.60        | 9741 |
| Washpool (Qld)      | RR[3032] | 0.22        | 0.64        | 1.80        | 75   |
| Watalgan            | RR[3033] | 0.26        | 0.85        | 2.68        | 38   |
| Wateranga           | RR[3034] | 0.32        | 0.93        | 2.96        | 3    |
| Waterford (Qld)     | RR[3035] | 0.30        | 0.57        | 1.05        | 4105 |
| Waterford West      | RR[3036] | 0.39        | 0.70        | 1.20        | 5142 |
| Waterloo (Qld)      | RR[3037] | 0.27        | 0.76        | 2.23        | 131  |
| Watsons Crossing    | RR[3038] | 0.25        | 0.91        | 3.40        | 12   |
| Watsonville         | RR[3039] | 0.39        | 1.02        | 2.83        | 158  |
| Wattle Camp         | RR[3040] | 0.33        | 0.86        | 2.12        | 422  |
| Wattle Grove (Qld)  | RR[3041] | 0.29        | 0.85        | 2.43        | 68   |
| Wattle Ridge (Qld)  | RR[3042] | 0.27        | 0.87        | 2.51        | 33   |
| Wattlebank          | RR[3043] | 0.33        | 0.96        | 3.05        | 64   |
| Wagh Pocket         | RR[3044] | 0.49        | 1.55        | 4.41        | 38   |
| Wavell Heights      | RR[3045] | 0.93        | 1.35        | 1.93        | 7606 |
| Waverley (Qld)      | RR[3046] | 0.59        | 1.58        | 4.55        | 17   |
| Wealwandangie       | RR[3047] | 0.33        | 0.99        | 2.77        | 25   |
| Webb                | RR[3048] | <b>1.03</b> | <b>2.67</b> | <b>5.86</b> | 301  |
| Weengallon          | RR[3049] | 0.30        | 0.91        | 2.78        | 30   |

|                             |          |             |             |             |      |
|-----------------------------|----------|-------------|-------------|-------------|------|
| Weerriba                    | RR[3050] | 0.25        | 0.97        | 3.15        | 0    |
| Weipa Airport               | RR[3051] | 0.26        | 1.06        | 4.44        | 0    |
| Weir River                  | RR[3052] | 0.30        | 0.83        | 2.64        | 21   |
| Welcome Creek               | RR[3053] | 0.27        | 0.73        | 1.97        | 354  |
| Wellcamp                    | RR[3054] | 0.30        | 0.84        | 2.22        | 243  |
| Wellesley (Qld)             | RR[3055] | 0.30        | 0.96        | 2.88        | 57   |
| Wellesley Islands           | RR[3056] | 0.30        | 1.26        | 3.34        | 793  |
| Wellington Point            | RR[3057] | 0.56        | 0.85        | 1.26        | 9925 |
| Welsby                      | RR[3058] | 0.31        | 1.30        | 5.09        | 5    |
| Wengenville                 | RR[3059] | 0.31        | 0.87        | 2.40        | 36   |
| Wenlock                     | RR[3060] | 0.35        | 1.18        | 3.64        | 3    |
| Weranga                     | RR[3061] | 0.34        | 0.98        | 2.77        | 168  |
| Weribone                    | RR[3062] | 0.33        | 0.97        | 2.88        | 9    |
| West End (Brisbane - Qld)   | RR[3063] | 0.77        | 1.16        | 1.63        | 8256 |
| West End (Townsville - Qld) | RR[3064] | 0.66        | 1.16        | 1.93        | 3468 |
| West Gladstone              | RR[3065] | 0.56        | 0.99        | 1.69        | 3875 |
| West Haldon                 | RR[3066] | 0.24        | 0.69        | 1.92        | 57   |
| West Ipswich                | RR[3067] | 0.59        | 1.46        | 3.52        | 418  |
| West Mackay                 | RR[3068] | <b>1.24</b> | <b>1.84</b> | <b>2.61</b> | 5097 |
| West Point                  | RR[3069] | 0.74        | 2.61        | 8.42        | 32   |
| West Prairie                | RR[3070] | 0.26        | 0.74        | 1.93        | 65   |
| West Rockhampton            | RR[3071] | 0.87        | 1.69        | 3.08        | 1459 |
| West Stowe                  | RR[3072] | 0.25        | 0.70        | 1.78        | 245  |
| West Wellesley Islands      | RR[3073] | 0.14        | 1.17        | 8.04        | 0    |
| West Woombye                | RR[3074] | 0.36        | 0.83        | 1.83        | 832  |
| Westbrook (Qld)             | RR[3075] | 0.28        | 0.59        | 1.15        | 2798 |
| Westcourt                   | RR[3076] | <b>1.29</b> | <b>2.04</b> | <b>3.15</b> | 3382 |
| Western Creek (Qld)         | RR[3077] | 0.25        | 0.82        | 2.31        | 15   |
| Westgrove                   | RR[3078] | 0.33        | 1.06        | 3.13        | 3    |
| Westlake                    | RR[3079] | 0.22        | 0.47        | 0.95        | 3564 |
| Westmar                     | RR[3080] | 0.28        | 0.90        | 2.77        | 41   |
| Westvale                    | RR[3081] | 0.30        | 0.82        | 2.31        | 0    |
| Westwood (Qld)              | RR[3082] | 0.54        | 1.50        | 3.82        | 138  |
| Wetheron                    | RR[3083] | 0.33        | 0.93        | 2.72        | 37   |
| Weyba Downs                 | RR[3084] | 0.29        | 0.88        | 2.30        | 246  |
| Wharps                      | RR[3085] | 0.40        | 1.25        | 3.65        | 0    |
| Wheatlands                  | RR[3086] | 0.32        | 0.87        | 2.23        | 76   |
| Wheatvale                   | RR[3087] | 0.28        | 0.82        | 2.30        | 49   |
| Whetstone                   | RR[3088] | 0.36        | 0.93        | 2.99        | 53   |
| Whichello                   | RR[3089] | 0.27        | 0.80        | 2.60        | 25   |
| White Mountain              | RR[3090] | 0.25        | 0.74        | 2.21        | 18   |
| White Patch                 | RR[3091] | 0.32        | 1.19        | 4.19        | 127  |
| White Rock (Cairns - Qld)   | RR[3092] | 0.70        | 1.20        | 1.87        | 3684 |
| White Rock (Ipswich - Qld)  | RR[3093] | 0.24        | 0.66        | 1.92        | 3    |
| Whiteside                   | RR[3094] | 0.24        | 0.64        | 1.60        | 606  |
| Whitfield (Qld)             | RR[3095] | 0.82        | 1.36        | 2.21        | 3406 |
| Whitsundays                 | RR[3096] | 0.10        | 0.32        | 0.84        | 2107 |
| Whyanbeel                   | RR[3097] | 0.45        | 1.18        | 3.18        | 142  |
| Widgee                      | RR[3098] | 0.46        | 1.05        | 2.29        | 668  |
| Widgee Crossing North       | RR[3099] | 0.25        | 0.73        | 2.09        | 18   |

|                       |          |             |             |             |      |
|-----------------------|----------|-------------|-------------|-------------|------|
| Widgee Crossing South | RR[3100] | 0.23        | 0.71        | 2.26        | 35   |
| Widgeegoara           | RR[3101] | 0.34        | 1.06        | 3.09        | 26   |
| Wieambilla            | RR[3102] | 0.29        | 0.88        | 2.56        | 70   |
| Wights Mountain       | RR[3103] | 0.21        | 0.55        | 1.48        | 641  |
| Wigton                | RR[3104] | 0.34        | 0.92        | 2.62        | 4    |
| Wildash               | RR[3105] | 0.35        | 0.99        | 2.75        | 54   |
| Wilkesdale            | RR[3106] | 0.32        | 0.90        | 2.34        | 96   |
| Willawong             | RR[3107] | 0.27        | 0.74        | 1.87        | 157  |
| Willow Vale (Qld)     | RR[3108] | 0.13        | 0.37        | 0.89        | 1595 |
| Willowbank            | RR[3109] | 0.18        | 0.47        | 1.20        | 1063 |
| Willows               | RR[3110] | 0.52        | 1.52        | 3.69        | 133  |
| Willowvale (Qld)      | RR[3111] | 0.27        | 0.77        | 2.04        | 78   |
| Wills                 | RR[3112] | 0.47        | 1.49        | 4.69        | 14   |
| Wilson Beach          | RR[3113] | 0.34        | 1.13        | 3.71        | 49   |
| Wilson Valley         | RR[3114] | 0.29        | 0.94        | 3.10        | 14   |
| Wilsons Plains        | RR[3115] | 0.22        | 0.63        | 1.83        | 44   |
| Wilsons Pocket        | RR[3116] | 0.34        | 1.04        | 2.96        | 163  |
| Wilsonton             | RR[3117] | 0.81        | 1.23        | 1.93        | 4798 |
| Wilsonton Heights     | RR[3118] | 0.34        | 0.72        | 1.41        | 2091 |
| Wilston               | RR[3119] | 0.85        | 1.40        | 2.27        | 3124 |
| Winchester            | RR[3120] | 0.29        | 0.84        | 2.54        | 5    |
| Windaroo              | RR[3121] | 0.30        | 0.64        | 1.32        | 2236 |
| Windaera (Qld)        | RR[3122] | 0.28        | 0.81        | 2.37        | 70   |
| Windermere (Qld)      | RR[3123] | 0.36        | 0.91        | 2.47        | 139  |
| Windeyer (Qld)        | RR[3124] | 0.39        | 1.15        | 3.22        | 22   |
| Windorah              | RR[3125] | 0.39        | 1.22        | 3.35        | 94   |
| Windsor (Qld)         | RR[3126] | 1.00        | 1.49        | 2.15        | 5958 |
| Winfield              | RR[3127] | 0.45        | 1.30        | 3.37        | 137  |
| Winston               | RR[3128] | 0.64        | 1.39        | 2.83        | 908  |
| Winton (Qld)          | RR[3129] | <b>2.11</b> | <b>4.12</b> | <b>6.95</b> | 727  |
| Winwill               | RR[3130] | 0.22        | 0.63        | 1.92        | 129  |
| Winya                 | RR[3131] | 0.27        | 0.77        | 2.31        | 58   |
| Wishart (Qld)         | RR[3132] | 0.24        | 0.42        | 0.69        | 8563 |
| Withcott              | RR[3133] | 0.19        | 0.46        | 1.00        | 1447 |
| Witheren              | RR[3134] | 0.29        | 0.75        | 2.02        | 422  |
| Witta                 | RR[3135] | 0.27        | 0.62        | 1.37        | 1036 |
| Wivenhoe Hill         | RR[3136] | 0.27        | 0.82        | 2.70        | 4    |
| Wivenhoe Pocket       | RR[3137] | 0.33        | 0.85        | 2.18        | 355  |
| Wiyarra               | RR[3138] | 0.22        | 0.76        | 2.13        | 16   |
| Woleebee              | RR[3139] | 0.35        | 0.88        | 2.60        | 95   |
| Wolfgang              | RR[3140] | 0.28        | 0.88        | 2.43        | 59   |
| Wolffdene             | RR[3141] | 0.21        | 0.59        | 1.46        | 237  |
| Wolvi                 | RR[3142] | 0.25        | 0.67        | 1.72        | 375  |
| Womalilla             | RR[3143] | 0.36        | 1.02        | 3.15        | 36   |
| Womblebank            | RR[3144] | 0.38        | 1.09        | 3.10        | 10   |
| Womina                | RR[3145] | 0.25        | 0.72        | 1.96        | 185  |
| Wonbah                | RR[3146] | 0.26        | 0.79        | 2.38        | 87   |
| Wonbah Forest         | RR[3147] | 0.27        | 0.85        | 2.64        | 5    |
| Wondai                | RR[3148] | 0.90        | 1.72        | 2.86        | 1626 |
| Wondalli              | RR[3149] | 0.31        | 0.96        | 2.67        | 52   |



|                     |          |             |             |             |      |
|---------------------|----------|-------------|-------------|-------------|------|
| Wondecla            | RR[3150] | 0.31        | 0.83        | 2.03        | 534  |
| Wondunna            | RR[3151] | 0.40        | 0.82        | 1.52        | 2042 |
| Wonga Beach         | RR[3152] | 0.69        | 1.59        | 3.27        | 766  |
| Wongabel            | RR[3153] | 0.36        | 0.99        | 2.77        | 182  |
| Wongaling Beach     | RR[3154] | 0.44        | 1.12        | 2.45        | 1035 |
| Wongawallan         | RR[3155] | 0.42        | 0.95        | 2.07        | 989  |
| Wonglepong          | RR[3156] | 0.31        | 0.82        | 2.09        | 286  |
| Woocoo              | RR[3157] | 0.31        | 0.87        | 2.56        | 44   |
| Woodbine (Qld)      | RR[3158] | 0.24        | 0.69        | 2.00        | 20   |
| Woodbury (Qld)      | RR[3159] | 0.28        | 0.76        | 1.94        | 358  |
| Woodend (Qld)       | RR[3160] | 0.53        | 1.18        | 2.43        | 1060 |
| Wooderson           | RR[3161] | 0.26        | 0.74        | 2.17        | 161  |
| Woodford (Qld)      | RR[3162] | 0.67        | 1.17        | 1.96        | 3033 |
| Woodgate            | RR[3163] | 0.66        | 1.39        | 2.78        | 1074 |
| Woodhill (Qld)      | RR[3164] | 0.20        | 0.54        | 1.41        | 523  |
| Woodlands (Qld)     | RR[3165] | 0.23        | 0.67        | 1.99        | 89   |
| Woodleigh (Qld)     | RR[3166] | 0.23        | 0.85        | 2.83        | 3    |
| Woodmillar          | RR[3167] | 0.29        | 0.89        | 2.65        | 83   |
| Woodridge (Qld)     | RR[3168] | 0.64        | 0.94        | 1.34        | 9565 |
| Woodstock (Qld)     | RR[3169] | 0.70        | 1.88        | 4.56        | 194  |
| Woodwark            | RR[3170] | 0.25        | 0.73        | 2.04        | 295  |
| Woody Point         | RR[3171] | 0.80        | 1.32        | 2.09        | 3793 |
| Woolein             | RR[3172] | 0.29        | 0.91        | 3.03        | 7    |
| Woolgar             | RR[3173] | 0.49        | 1.31        | 4.14        | 5    |
| Woolloongabba       | RR[3174] | 0.64        | 1.05        | 1.67        | 5079 |
| Woolmar             | RR[3175] | 0.26        | 0.69        | 1.70        | 334  |
| Woolmer             | RR[3176] | 0.22        | 0.68        | 1.94        | 31   |
| Woolooga            | RR[3177] | 0.29        | 0.79        | 2.16        | 200  |
| Woolooman           | RR[3178] | 0.20        | 0.66        | 2.20        | 20   |
| Wooloowin           | RR[3179] | <b>1.01</b> | <b>1.65</b> | <b>2.58</b> | 3340 |
| Woolshed            | RR[3180] | 0.25        | 0.72        | 2.08        | 5    |
| Woombye             | RR[3181] | 0.53        | 1.00        | 1.82        | 2541 |
| Woondum             | RR[3182] | 0.22        | 0.68        | 2.08        | 63   |
| Woongarra           | RR[3183] | 0.63        | 1.45        | 3.04        | 460  |
| Woongoolba          | RR[3184] | 0.50        | 1.33        | 3.28        | 224  |
| Woopen Creek        | RR[3185] | 0.38        | 1.05        | 2.89        | 125  |
| Woorabinda          | RR[3186] | 0.40        | 1.02        | 2.51        | 638  |
| Woorim              | RR[3187] | <b>1.05</b> | <b>1.98</b> | <b>3.41</b> | 1631 |
| Wooroolin           | RR[3188] | 0.34        | 0.94        | 2.36        | 262  |
| Wooroona            | RR[3189] | 0.34        | 0.95        | 2.90        | 7    |
| Wooroonden          | RR[3190] | 0.28        | 0.82        | 2.44        | 45   |
| Wooroonooran        | RR[3191] | 0.43        | 1.18        | 3.13        | 0    |
| Wootha              | RR[3192] | 0.29        | 0.86        | 2.62        | 168  |
| Woowoonga           | RR[3193] | 0.31        | 0.88        | 2.72        | 84   |
| Woree               | RR[3194] | 0.57        | 1.02        | 1.65        | 3850 |
| Worongary           | RR[3195] | 0.49        | 0.86        | 1.39        | 4493 |
| Wowan               | RR[3196] | 0.31        | 0.90        | 2.34        | 184  |
| Wrattens Forest     | RR[3197] | 0.30        | 0.83        | 2.37        | 3    |
| Wrights Creek (Qld) | RR[3198] | 0.37        | 1.04        | 3.01        | 132  |
| Wrotham             | RR[3199] | 0.44        | 1.30        | 3.73        | 0    |

|                 |          |             |             |             |       |
|-----------------|----------|-------------|-------------|-------------|-------|
| Wujal Wujal     | RR[3200] | <b>1.06</b> | <b>3.09</b> | <b>7.79</b> | 220   |
| Wulguru         | RR[3201] | 0.41        | 0.76        | 1.34        | 3772  |
| Wulkuraka       | RR[3202] | 0.36        | 0.87        | 1.94        | 880   |
| Wunjunga        | RR[3203] | 0.35        | 1.24        | 3.65        | 9     |
| Wura            | RR[3204] | 0.36        | 1.05        | 3.34        | 8     |
| Wurdong Heights | RR[3205] | 0.22        | 0.58        | 1.55        | 370   |
| Wurtulla        | RR[3206] | 0.52        | 0.93        | 1.47        | 4737  |
| Wuruma Dam      | RR[3207] | 0.31        | 0.82        | 2.43        | 32    |
| Wutul           | RR[3208] | 0.27        | 0.83        | 2.48        | 37    |
| Wyaga           | RR[3209] | 0.31        | 0.83        | 2.68        | 71    |
| Wyalla          | RR[3210] | 0.31        | 0.86        | 2.45        | 31    |
| Wyandra         | RR[3211] | 0.37        | 1.06        | 2.93        | 88    |
| Wyaralong       | RR[3212] | 0.24        | 0.67        | 1.96        | 13    |
| Wyberba         | RR[3213] | 0.27        | 0.96        | 3.04        | 67    |
| Wycarbah        | RR[3214] | 0.44        | 1.39        | 3.60        | 39    |
| Wychie          | RR[3215] | 0.30        | 0.83        | 2.45        | 14    |
| Wycombe         | RR[3216] | 0.32        | 0.98        | 2.86        | 32    |
| Wynnum          | RR[3217] | <b>1.19</b> | <b>1.59</b> | <b>2.08</b> | 10583 |
| Wynnum West     | RR[3218] | <b>1.01</b> | <b>1.44</b> | <b>1.88</b> | 9939  |
| Wyreema         | RR[3219] | 0.33        | 0.75        | 1.67        | 1337  |
| Wyuna (Qld)     | RR[3220] | 0.28        | 0.83        | 2.42        | 35    |
| Yaamba          | RR[3221] | 0.34        | 0.96        | 2.73        | 54    |
| Yabulu          | RR[3222] | 0.32        | 0.81        | 1.88        | 592   |
| Yagaburne       | RR[3223] | 0.28        | 0.85        | 3.00        | 13    |
| Yagoonya        | RR[3224] | 0.46        | 1.40        | 4.14        | 20    |
| Yalangur        | RR[3225] | 0.26        | 0.75        | 1.92        | 57    |
| Yalboroo        | RR[3226] | 0.32        | 0.93        | 2.65        | 124   |
| Yamanto         | RR[3227] | 0.20        | 0.43        | 0.85        | 3704  |
| Yandaran        | RR[3228] | 0.43        | 1.10        | 2.67        | 370   |
| Yandarlo        | RR[3229] | 0.38        | 1.10        | 3.13        | 14    |
| Yandilla        | RR[3230] | 0.26        | 0.77        | 2.56        | 43    |
| Yandina         | RR[3231] | 0.55        | 1.09        | 2.02        | 1933  |
| Yandina Creek   | RR[3232] | 0.24        | 0.57        | 1.39        | 581   |
| Yangan          | RR[3233] | 0.30        | 0.79        | 1.90        | 318   |
| Yargullen       | RR[3234] | 0.25        | 0.75        | 2.18        | 22    |
| Yaroomba        | RR[3235] | 0.20        | 0.50        | 1.21        | 1241  |
| Yarrabah        | RR[3236] | <b>1.81</b> | <b>3.06</b> | <b>4.90</b> | 1692  |
| Yarrabilba      | RR[3237] | 0.12        | 0.32        | 0.72        | 2455  |
| Yarraden        | RR[3238] | 0.42        | 1.30        | 3.93        | 11    |
| Yarraman (Qld)  | RR[3239] | 0.43        | 1.00        | 2.14        | 902   |
| Yarranlea       | RR[3240] | 0.26        | 0.74        | 2.15        | 73    |
| Yarrol          | RR[3241] | 0.30        | 0.85        | 2.25        | 5     |
| Yarwun          | RR[3242] | 0.36        | 1.05        | 2.96        | 97    |
| Yatala          | RR[3243] | 0.23        | 0.55        | 1.21        | 1072  |
| Yeerongpilly    | RR[3244] | 0.45        | 1.01        | 1.99        | 1617  |
| Yelarbon        | RR[3245] | 0.78        | 2.03        | 4.90        | 283   |
| Yenda (Qld)     | RR[3246] | 0.32        | 0.88        | 2.63        | 20    |
| Yengarie        | RR[3247] | 0.24        | 0.70        | 1.76        | 364   |
| Yeppoon         | RR[3248] | <b>1.84</b> | <b>2.55</b> | <b>3.40</b> | 5367  |
| Yeronga         | RR[3249] | 0.99        | 1.52        | 2.23        | 5629  |

|              |          |      |      |      |      |
|--------------|----------|------|------|------|------|
| Yerra        | RR[3250] | 0.31 | 0.83 | 2.20 | 89   |
| Yimbun       | RR[3251] | 0.30 | 0.81 | 2.51 | 30   |
| Yorkeys Knob | RR[3252] | 0.95 | 1.69 | 2.74 | 2365 |
| Yowah        | RR[3253] | 0.37 | 1.11 | 3.03 | 129  |
| Yugar        | RR[3254] | 0.20 | 0.59 | 1.71 | 290  |
| Yulabilla    | RR[3255] | 0.32 | 0.93 | 2.71 | 26   |
| Yuleba       | RR[3256] | 0.27 | 0.85 | 2.37 | 164  |
| Yuleba North | RR[3257] | 0.31 | 0.91 | 2.44 | 58   |
| Yuleba South | RR[3258] | 0.30 | 0.93 | 2.60 | 27   |
| Yungaburra   | RR[3259] | 0.30 | 0.79 | 1.77 | 990  |
| Yuruga       | RR[3260] | 0.38 | 1.09 | 3.10 | 61   |
| Zillmere     | RR[3261] | 0.89 | 1.33 | 1.84 | 7402 |
| Zilzie       | RR[3262] | 0.49 | 1.02 | 1.97 | 2041 |
